# Supplementary material for: In-hospital cardiac arrest in critically ill patients with covid-19: multicenter cohort study
Source: PubMed Central journal article supplement — BMJ. 2020 Sep 30;371:m3513. doi: 10.1136/bmj.m3513 (PMC7525342; doi:10.1136/bmj.m3513), 2020-09-30
Supplement: hays060127.ww1.pdf [file hays060127.ww1.pdf]

## Supplementary Appendix

### In-Hospital Cardiac Arrest in Critically Ill Patients with Covid-19

**STOP**  
**COVID** Study of the Treatment and Outcomes in critically ill  
Patients with COVID-19

## Table of Contents

|                                                                                               |     |
|-----------------------------------------------------------------------------------------------|-----|
| STOP-COVID Investigators.....                                                                 | 3-6 |
| Table S1. List of Participating Sites.....                                                    | 7   |
| Table S2. Definitions of Baseline Characteristics, Comorbidities, and Treatments .....        | 8-9 |
| Table S3. Modified SOFA Score.....                                                            | 10  |
| Table S4. Missing Value Counts and Frequencies.....                                           | 11  |
| Table S5. Duration of CPR (minutes), stratified by age, sex, race and number of ICU beds..... | 12  |
| Table S6: Determinants of hospital mortality post-CPR.....                                    | 13  |
| References.....                                                                               | 14  |

## **STOP-COVID INVESTIGATORS**

**Baylor College of Medicine:** Carl P. Walther\*, Samaya J. Anumudu

**Baylor University Medical Center:** Justin Arunthamakun\*, Kathleen F. Kopecky, Gregory P. Milligan, Peter A. McCullough, Thuy-Duyen Nguyen

**Beth Israel Deaconess Medical Center:** Shahzad Shaefi\*, Megan L. Krajewski, Sidharth Shankar, Ameeka Pannu, Juan D. Valencia

**Boston Medical Center:** Sushrut S. Waikar\*, Zoe A. Kibbelaar

**Cook County Health:** Ambarish M. Athavale\*, Peter Hart, Shristi Upadhyay, Ishaan Vohra, Ajiboye Oyintayo

**Cooper University Health Care:** Adam Green\*, Jean-Sebastien Rachoin, Christa A. Schorr, Lisa Shea

**Duke University Medical Center:** Daniel L. Edmonston\*, Christopher L. Mosher

**Hackensack Meridian Health Mountainside Medical Center:** Alexandre M. Shehata\*, Zaza Cohen, Valerie Allusson, Gabriela Bambrick-Santoyo, Noor ul aain Bhatti, Bijal Mehta, Aquino Williams

**Hackensack Meridian Health Hackensack University Medical Center:** Samantha K. Brenner\*, Patricia Walters, Ronaldo C. Go, Keith M. Rose

**Harvard T.H. Chan School of Public Health:** Miguel A. Hernán

**Harvard University:** Amy M. Zhou, Ethan C. Kim, Rebecca Lisk

**Icahn School of Medicine at Mount Sinai:** Lili Chan\*, Kusum S. Mathews\*, Steven G. Coca, Deena R. Altman, Aparna Saha, Howard Soh, Huei Hsun Wen, Sonali Bose, Emily A. Leven, Jing G. Wang, Gohar Mosoyan, Girish N. Nadkarni, Pattharawin Pattharanitima, Emily J. Gallagher

**Indiana University School of Medicine/Indiana University Health:** Allon N. Friedman\*, John Guirguis, Rajat Kapoor, Christopher Meshberger, Katherine J. Kelly

**Johns Hopkins Hospital:** Chirag R. Parikh\*, Brian T. Garibaldi, Celia P. Corona-Villalobos, Yumeng Wen, Steven Menez, Rubab F. Malik, Elena Cervantes, Samir Gautam

**Kings County Hospital Center:** Mary C. Mallappallil\*, Jie Ouyang, Sabu John, Ernie Yap, Yohannes Melaku, Ibrahim Mohamed, Siddartha Bajracharya, Isha Puri, Mariah Thaxton, Jyotsna Bhattacharya, John Wagner, Leon Boudourakis

**Loma Linda University:** H. Bryant Nguyen\*, Afshin Ahouhim

**Mayo Clinic, Arizona:** Leslie F. Thomas\*, Dheeraj Reddy Sirganagari

**Mayo Clinic, Florida:** Pramod K. Guru\*

**Mayo Clinic, Rochester:** Kianoush Kashani\* and Shahrzad Tehranian

**Medical College of Wisconsin:** Yan Zhou,\* Paul A. Bergl, Jesus Rodriguez, Jatan A. Shah, Mrigank S. Gupta

**MedStar Georgetown University Hospital:** Princy N. Kumar\*, Deepa G. Lazarous, Seble G. Kassaye

**Montefiore Medical Center/Albert Einstein College of Medicine:** Michal L. Melamed\*, Tanya S. Johns, Ryan Mocerino, Kalyan Prudhvi, Denzel Zhu, Rebecca V. Levy, Yorg Azzi, Molly Fisher, Milagros Yunes, Kaltrina Sedaliu, Ladan Golestaneh, Maureen Brogan, Neelja Kumar, Michael Chang, Jyotsana Thakkar

**New York-Presbyterian Queens Hospital:** Ritesh Raichoudhury\*, Akshay Athreya, Mohamed Farag

**New York-Presbyterian/Weill Cornell Medical Center:** Edward J. Schenck\*, Soo Jung Cho, Maria Plataki, Sergio L. Alvarez-Mulett, Luis G. Gomez-Escobar, Di Pan, Stefi Lee, Jamuna Krishnan, William Whalen

**New York University Langone Hospital:** David Charytan\*, Ashley Macina, Sobaata Chaudhry, Benjamin Wu, Frank Modersitzki

**Northwestern Memorial Hospital:** Northwestern University Feinberg School of Medicine - Anand Srivastava\*, Alexander S. Leidner, Carlos Martinez, Jacqueline M. Kruser, Richard G. Wunderink, Alexander J. Hodakowski

**Ochsner Medical Center:** Juan Carlos Q. Velez\*, Eboni G. Price-Haywood, Luis A. Matute-Trochez, Anna E. Hasty, Muner MB. Mohamed

**Oregon Health and Science University Hospital:** Rupali S. Avasare\*, David Zonies\*

**Partners Healthcare:** Brigham and Women's Hospital, Brigham and Women's Faulkner Hospital, Massachusetts General Hospital, and Newton Wellesley Hospital - David E. Leaf\*, Shruti Gupta\*, Meghan E. Sise, Erik T. Newman, Samah Abu Omar, Kapil K. Pokharel, Shreyak Sharma, Harkarandeep Singh, Simon Correa, Tanveer Shaikat, Omer Kamal, Wei Wang, Heather Yang, Jeffery O. Boateng, Meghan Lee, Ian A. Strohbehm, Jiahua Li, Ariel L. Mueller

**ProMedica Health System:** Roberta Redfern,\* Nicholas S. Cairl, Gabriel Naimy, Abeer Abu-Saif, Danyell Hall, Laura Bickley

**Renown Health:** Chris Rowan\*, Farah Madhani-Lovely\*, Vivian S. Cruz, Kristen M. Hess, Alanna L. Jacobs

**Rush University Medical Center:** Vasil Peev\*, Jochen Reiser, John J. Byun, Andrew Vissing, Esha M. Kapania, Zoe Post, Nilam P. Patel, Joy-Marie Hermes

**Rutgers/New Jersey Medical School:** Anne K. Sutherland\*, Ameer Patrawalla, Diana G. Finkel, Barbara A. Danek, Sowminya Arikapudi, Jeffrey M. Paer, Peter Cangialosi, Mark Liotta

**Rutgers/Robert Wood Johnson Medical School:** Jared Radbel\*, Sonika Puri, Jag Sunderram, Matthew T. Scharf, Ayesha Ahmed, Ilya Berim, Jayanth S. Watson

**Stanford Healthcare:** Stanford University School of Medicine – Shuchi Anand\*, Joseph E. Levitt, Pablo Garcia

**Temple University Hospital:** Suzanne M. Boyle\*, Rui Song

**Thomas Jefferson University Hospital:** Jingjing Zhang\*, Sang Hoon Woo, Xiaoying Deng, Goni Katz-Greenberg, Katharine Senter

**Tulane Medical Center:** Moh'd A. Sharshir\*, Vadym V. Rusnak

**United Health Services Hospitals:** Muhammad Imran Ali

**University of Colorado Anschutz Medical Campus:** Anip Bansal\*, Amber S. Podoll, Michel Chonchol, Sunita Sharma, Ellen L. Burnham

**University Hospitals Cleveland Medical Center:** Arash Rashidi\*, Rana Hejal

**University of Alabama-Birmingham Hospital:** Eric Judd\*, Laura Latta, Ashita Tolwani

**University of California-Davis Medical Center:** Timothy E. Albertson\*, Jason Y. Adams

**University of California-Los Angeles Medical Center:** Ronald Reagan-UCLA Medical Center - Steven Y. Chang\*, Rebecca M. Beutler; UCLA Medical Center, Santa Monica – Carl E. Schulze

**University of California-San Diego Medical Center:** Etienne Macedo\*, Harin Rhee

**University of California-San Francisco Medical Center:** Kathleen D. Liu\*, Vasantha K. Jotwani

**University of Chicago Medical Center:** Jay L. Koyner\*

**University of Florida Health-Gainesville:** Chintan V. Shah\*

**University of Florida-Health-Jacksonville:** Vishal Jaikaransingh\*

**University of Illinois Hospital and Health Sciences System:** Stephanie M. Toth-Manikowski\*, Min J. Joo\*, James P. Lash

**University of Kentucky Medical Center:** Javier A. Neyra\*, Nourhan Chaaban, Madona Elias, Yahya Ahmad

**University Medical Center of Southern Nevada:** Alfredo Iardino, Elizabeth H. Au, Jill H. Sharma

**University of Miami Health System:** Marie Anne Sosa\*, Sabrina Taldone, Gabriel Contreras, David De La Zerda, Hayley B. Gershengorn, Bhavarth Shukla, Alessia Feroni, Tanira Ferreira

**University of Michigan:** Salim S. Hayek\*, Penelope Blakely, Hanna Berlin, Tariq U. Azam, Husam Shadid, Michael Pan, Patrick O' Hayer, Chelsea Meloche, Rafey Feroze, Rayan Kaakati,

Danny Perry, Abbas Bitar, Elizabeth Anderson, Kishan J. Padalia, John P. Donnelly, Andrew J. Admon

**University of North Carolina School of Medicine:** Jennifer E. Flythe\*, Matthew J. Tugman, Emily H. Chang

**University of Oklahoma Health Sciences Center:** Brent R. Brown\*

**University of Pennsylvania Health System:** Amanda K. Leonberg-Yoo\*, Ryan C. Spiardi, Todd A. Miano, Meaghan S. Roche, Charles R. Vasquez

**University of Pittsburgh Medical Center:** Amar D. Bansal\*, Natalie C. Ernecoff, Sanjana Kapoor, Siddharth Verma, Huiwen Chen

**University of Tennessee Health Science Center and Memphis VA Medical Center/Methodist**

**University Hospital** – Csaba P. Kovesdy\*, Miklos Z. Molnar\*, Ambreen Azhar

**University of Texas Southwestern Medical Center and Parkland Health and Hospital System:** S. Susan Hedayati\*, Mridula V. Nadamuni, Shani Shastri, Duwayne L. Willett

**University of Vermont Larner College of Medicine:** Samuel A.P. Short

**University of Virginia Health System:** Amanda D. Renaghan\*, Kyle B. Enfield

**University of Washington Medical Center:** Pavan K. Bhatraju\*, A. Bilal Malik

**Vanderbilt University Medical Center:** Matthew W. Semler

**Washington University in St. Louis/Barnes Jewish Hospital:** Anitha Vijayan\*, Christina Mariyam Joy, Tingting Li, Seth Goldberg, Patricia F. Kao

**Wellforce Health System:** Lowell General Hospital - Greg L. Schumaker\*, Tufts Medical Center - Nitender Goyal\*, Anthony J. Faugno, Greg L. Schumaker, Caroline M. Hsu, Asma Tariq, Leah Meyer, Ravi K. Kshirsagar, Daniel E. Weiner, Aju Jose

**Westchester Medical Center:** Marta Christov\*, Jennifer Griffiths, Sanjeev Gupta, Aromma Kapoor

**Yale School of Medicine:** Perry Wilson,\* Tanima Arora, Ugochukwu Ugwuowo

\*Site Principal Investigator

**Table S1. List of Participating Sites**

|                                                                |
|----------------------------------------------------------------|
| <b>Northeast</b>                                               |
| Beth Israel Deaconess Medical Center                           |
| Brigham and Women's Faulkner Hospital                          |
| Brigham and Women's Hospital                                   |
| Cooper University Health Care                                  |
| Hackensack Meridian Health                                     |
| Hackensack University Medical Center                           |
| Hackensack Mountainside Hospital                               |
| Johns Hopkins Hospital                                         |
| Kings County Hospital Center                                   |
| Lowell General Hospital                                        |
| Massachusetts General Hospital                                 |
| MedStar Georgetown University Hospital                         |
| Montefiore Medical Center                                      |
| Mount Sinai                                                    |
| Newton Wellesley Hospital                                      |
| New York-Presbyterian Queens Hospital                          |
| New York-Presbyterian/Weill Cornell Medical Center             |
| New York University Langone Hospital                           |
| Rutgers/New Jersey Medical School                              |
| Rutgers/Robert Wood Johnson Medical School                     |
| Temple University Hospital                                     |
| Jefferson Health                                               |
| Tufts Medical Center                                           |
| United Health Services Hospitals                               |
| University of Pennsylvania Health System                       |
| University of Pittsburgh Medical Center                        |
| Westchester Medical Center                                     |
| Yale University Medical Center                                 |
| <b>South</b>                                                   |
| Baylor College of Medicine, Houston                            |
| Baylor University Medical Center/Baylor Scott White and Health |
| Duke University Medical Center                                 |
| Mayo Clinic, Florida                                           |
| Memphis VA Medical Center                                      |
| Methodist University Hospital                                  |
| Ochsner Medical Center                                         |
| Tulane Medical Center                                          |
| University of Alabama-Birmingham Hospital                      |

|                                                            |
|------------------------------------------------------------|
| University of Florida Health-Gainesville                   |
| University of Florida Health-Jacksonville                  |
| University of Miami Health System                          |
| University of North Carolina Hospitals                     |
| University of Texas Southwestern Medical Center            |
| University of Virginia Health System                       |
| <b>Midwest</b>                                             |
| Barnes-Jewish Hospital                                     |
| Cook County Health                                         |
| Froedtert Hospital                                         |
| Indiana University Health Methodist Hospital               |
| Mayo Clinic, Rochester                                     |
| Northwestern Memorial Hospital                             |
| Promedica Health System                                    |
| Rush University Medical Center                             |
| University Hospitals Cleveland Medical Center              |
| University of Chicago Medical Center                       |
| University of Illinois Hospital and Health Sciences System |
| University of Kentucky Hospital                            |
| University of Michigan Hospital                            |
| University of Oklahoma Health Sciences Center              |
| <b>West</b>                                                |
| Loma Linda University Medical Center                       |
| Mayo Clinic, Arizona                                       |
| Oregon Health and Science University Hospital              |
| Renown Health                                              |
| Stanford Healthcare                                        |
| University of California-Davis Medical Center              |
| University of California-Los Angeles Medical Center        |
| University of California-San Diego Medical Center          |
| University of California-San Francisco Medical Center      |
| UCHealth University of Colorado                            |
| University Medical Center of Southern Nevada               |
| University of Washington Medical Center                    |

**Table S2. Definitions of Baseline Characteristics, Comorbidities, and Treatments**

| <b>Baseline Characteristics</b>            |                                                                                                                                                                                                                          |
|--------------------------------------------|--------------------------------------------------------------------------------------------------------------------------------------------------------------------------------------------------------------------------|
| Baseline serum creatinine                  | Lowest value (mg/dl) within 365 to 7 days prior to hospital admission. If not available, serum creatinine on hospital admission                                                                                          |
| Healthcare worker                          | Physician, nurse, technician, or other medical professional who provides direct care to patients (does not include ancillary staff such as clerks, pharmacists, or kitchen/cleaning staff)                               |
| Home medications                           | Medications that the patient was taking at home within 1 week prior to admission. Does not include those started at an outside hospital if the patient was transferred.                                                  |
| Anticoagulation                            | Therapeutic anticoagulants, not including anti-platelet agents like aspirin or clopidogrel                                                                                                                               |
| Immunosuppressant drugs                    | Chemotherapy (in the 30 days prior to admission), corticosteroids >10 mg prednisone/day (or equivalent), calcineurin inhibitors (systemic, not topical), mycophenolate mofetil, azathioprine, rituximab, other           |
| <b>Coexisting Conditions</b>               |                                                                                                                                                                                                                          |
| Asthma                                     | Per chart review                                                                                                                                                                                                         |
| Atrial fibrillation/flutter                | Per chart review                                                                                                                                                                                                         |
| Bone marrow transplant                     | Per chart review                                                                                                                                                                                                         |
| Cancer                                     | Per chart review; active malignancy (other than non-melanoma skin cancer) treated in the past year. Defined as cancer of the lung, breast, colorectal, prostate, gastric, pancreatic, melanoma, ovarian, brain, or other |
| Chronic kidney disease                     | Baseline eGFR <60 ml/min/1.73m <sup>2</sup> on at least two consecutive values at least 12 weeks apart prior to hospital admission. If not available, defined as per chart review                                        |
| Chronic liver disease                      | Cirrhosis, alcohol-related liver disease, nonalcoholic fatty liver disease, autoimmune hepatitis, hepatitis B or hepatitis C, primary biliary cirrhosis, or other                                                        |
| Chronic obstructive pulmonary disease      | Per chart review                                                                                                                                                                                                         |
| Congestive heart failure                   | Per chart review; heart failure with preserved versus reduced ejection fraction                                                                                                                                          |
| Coronary artery disease                    | Per chart review; any history of angina, myocardial infarction, or coronary artery bypass graft surgery                                                                                                                  |
| Diabetes mellitus                          | Per chart review; insulin versus non-insulin dependent                                                                                                                                                                   |
| End stage renal disease                    | Per chart review; on hemodialysis or peritoneal dialysis                                                                                                                                                                 |
| History of alcohol abuse                   | Per chart review                                                                                                                                                                                                         |
| HIV/AIDS                                   | Per chart review                                                                                                                                                                                                         |
| Homelessness                               | Per chart review                                                                                                                                                                                                         |
| Hypertension                               | Per chart review                                                                                                                                                                                                         |
| Solid organ transplant                     | Per chart review (kidney, liver, heart, lung, other)                                                                                                                                                                     |
| Smoking                                    | Per chart review; does not include vaping or smoking of non-tobacco products. Non-smoker, former smoker, current smoker                                                                                                  |
| <b>Longitudinal Treatments<sup>a</sup></b> |                                                                                                                                                                                                                          |



|                                     |                                                                                                 |
|-------------------------------------|-------------------------------------------------------------------------------------------------|
| Extracorporeal membrane oxygenation | Veno-venous, veno-arterial, or veno-arterial-venous                                             |
| Mechanical cardiac support          | Impella, intra-aortic balloon pump, LVAD, RVAD, other                                           |
| Mechanical ventilation              | Invasive mechanical ventilation                                                                 |
| Renal replacement therapy           | CRRT 24 hours/day, CRRT ≤12 hours a day, intermittent hemodialysis, peritoneal dialysis, other. |
| PaO <sub>2</sub> <sup>b</sup>       | Lowest PaO <sub>2</sub> available during each 24 hour day (midnight to midnight)                |
| FiO <sub>2</sub> <sup>b</sup>       | FiO <sub>2</sub> corresponding to lowest PaO <sub>2</sub>                                       |
| PEEP <sup>b</sup>                   | Highest PEEP available during each 24 hour day (midnight to midnight)                           |
| Vasopressors                        | Maximum number of vasopressors required each day                                                |

Abbreviations: COVID-19, coronavirus-19; CRRT, continuous renal replacement therapy; eGFR, estimated glomerular filtration rate; FiO<sub>2</sub>, fraction of inspired oxygen; HIV/AIDs, human immunodeficiency syndrome/acquired immunodeficiency virus; LVAD, left ventricular assist device; PaO<sub>2</sub>, partial pressure of oxygen; PEEP, positive end-expiratory pressure; RVAD, right ventricular assist device.

<sup>a</sup>Longitudinal treatments and outcomes were recorded daily for the first 14 days following admission to the ICU. If multiple values were present, the lowest PaO<sub>2</sub> available, along with the corresponding FiO<sub>2</sub> at the time, was recorded, while the highest PEEP on each day was recorded. If the patient had an outcome, the date of the outcome was recorded.

<sup>b</sup>Only applies to patients on mechanical ventilation with an arterial blood gas available.

**Table S3. Modified SOFA Score.** The value from ICU day 1 was used. If unavailable on ICU day 1, the value from ICU day 2 was used. If neither was available, a score of 0 was used for that component.<sup>1-3</sup>

|                                                             | SOFA Score            |                        |                      |                           |                                       |
|-------------------------------------------------------------|-----------------------|------------------------|----------------------|---------------------------|---------------------------------------|
|                                                             | 0                     | 1                      | 2                    | 3                         | 4                                     |
| <b>SOFA Renal (Cr [mg/dl], UOP [ml/day], and acute RRT)</b> | Cr<1.2 and UOP≥500    | Cr 1.2-1.9 and UOP≥500 | Cr 2-3.4 and UOP≥500 | Cr 3.5-4.9 or UOP 200-499 | Cr ≥5 or UOP<200 or acute RRT or ESKD |
| <b>SOFA Liver (Bilirubin, mg/dl)</b>                        | <1.2                  | 1.2-1.9                | 2.0-5.9              | 6.0-11.9                  | ≥12                                   |
| <b>SOFA Coagulation (Platelets, K/mm<sup>3</sup>)</b>       | ≥150                  | 100-149                | 50-99                | 20-49                     | <20                                   |
| <b>SOFA Respiratory (PaO<sub>2</sub>:FiO<sub>2</sub>)</b>   | ≥400 or not intubated | 300-399                | 200-299              | 100-199                   | <100                                  |
| <b>SOFA Cardiovascular (#vasopressors/inotropes)</b>        | 0                     | 1                      | 2                    | 3                         | ≥4                                    |
| <b>SOFA CNS</b>                                             | No AMS                |                        | AMS                  |                           |                                       |

Abbreviations: AMS, altered mental status; Cr, creatinine (mg/dl); ESKD, end-stage kidney disease; RRT, renal replacement therapy; UOP, urine output.

**Table S4: Missing Value Counts and Frequencies**

| <b>Variable</b>                                    | <b>Count</b> | <b>Percentage</b> |
|----------------------------------------------------|--------------|-------------------|
| <b>Institution characteristics</b>                 |              |                   |
| Institution type                                   | 0            | 0                 |
| Number of ICU beds                                 | 0            | 0                 |
| <b>Demographics</b>                                |              |                   |
| Age                                                | 0            | 0                 |
| Sex                                                | 0            | 0                 |
| Race                                               | 1258         | 25.1              |
| Body mass index                                    | 198          | 3.9               |
| <b>Coexisting conditions</b>                       |              |                   |
| Smoking status                                     | 699          | 13.9              |
| Diabetes mellitus                                  | 0            | 0                 |
| Hypertension                                       | 0            | 0                 |
| Coronary artery disease                            | 0            | 0                 |
| Congestive heart failure                           | 0            | 0                 |
| Chronic obstructive pulmonary disease              | 0            | 0                 |
| Chronic or end stage kidney disease                | 0            | 0                 |
| Active malignancy                                  | 0            | 0                 |
| <b>Laboratory values on day 1 of ICU admission</b> |              |                   |
| White-cell count                                   | 314          | 6.3               |
| Lymphocyte count                                   | 1006         | 20.1              |
| Hemoglobin                                         | 312          | 6.2               |
| Platelet count                                     | 337          | 6.7               |
| Creatinine                                         | 269          | 5.4               |
| Albumin                                            | 961          | 19.1              |
| Aspartate aminotransferase                         | 949          | 18.9              |
| Alanine aminotransferase                           | 920          | 18.3              |
| Total bilirubin                                    | 938          | 18.7              |
| Lactate                                            | 1915         | 38.2              |
| Arterial pH                                        | 1640         | 32.7              |
| D-dimer                                            | 2221         | 44.3              |
| C-reactive protein                                 | 1845         | 36.8              |
| Ferritin                                           | 2041         | 40.7              |
| <b>Complications</b>                               |              |                   |
| Invasive mechanical ventilation                    | 0            | 0                 |
| On extracorporeal membrane oxygenation             | 0            | 0                 |
| Newly diagnosed reduced left ventricular function  | 0            | 0                 |
| On vasopressors                                    | 0            | 0                 |
| Acute kidney injury requiring RRT                  | 0            | 0                 |
| <b>Outcomes</b>                                    |              |                   |
| ICU length-of-stay                                 | 0            | 0                 |
| Vital status                                       | 0            | 0                 |

ICU: intensive care unit; RRT: renal replacement therapy

**Table S5: Duration of CPR (minutes) stratified by age, sex, race, and number of ICU beds**

|                      | <b>Median (IQR)</b> |
|----------------------|---------------------|
| Age Category, years  |                     |
| <45                  | 13 (7-20)           |
| 45-64                | 10 (5-20)           |
| 65-79                | 10 (5-18)           |
| ≥80                  | 7 (4-14)            |
| Male                 | 10 (5-19)           |
| Female               | 10 (5-18)           |
| White (non-Hispanic) | 11 (6-18)           |
| Black (non-Hispanic) | 11 (5-17)           |
| Number of ICU beds   |                     |
| ≥100                 | 10 (3-21)           |
| 50-99                | 14 (5-24)           |
| <50                  | 10 (6-15)           |

**Table S6: Determinants of hospital mortality post-CPR.** N=400. Number of deaths =352.

|                                                  | <b>Adjusted Odds Ratio<br/>(95%CI) for Death</b> | <b>P-value</b> |
|--------------------------------------------------|--------------------------------------------------|----------------|
| <b>Model 1:</b>                                  |                                                  |                |
| Age Category, years                              |                                                  |                |
| <45                                              | Reference                                        |                |
| 45-64                                            | 2.11 (0.86-5.19)                                 | 0.10           |
| 65-79                                            | 1.83 (0.72-4.66)                                 | 0.20           |
| ≥80                                              | 8.66 (1.00-75.22)                                | 0.050          |
| Male sex                                         | 2.42 (1.25-4.71)                                 | 0.009          |
| Number of ICU beds                               |                                                  |                |
| ≥100                                             | Reference                                        |                |
| 50-99                                            | 2.74 (1.23-6.12)                                 | 0.014          |
| <50                                              | 9.72 (4.40-21.47)                                | <0.001         |
| mSOFA score, per 2                               | 1.13 (0.88-1.44)                                 | 0.33           |
| <b>Model 2: Model 1 + initial cardiac rhythm</b> |                                                  |                |
| Ventricular fibrillation                         | Reference                                        |                |
| Pulseless ventricular tachycardia                | 1.99 (0.27-14.58)                                | 0.50           |
| Pulseless electrical activity                    | 1.33 (0.26-6.85)                                 | 0.73           |
| Asystole                                         | 1.97 (0.33-11.83)                                | 0.46           |

CPR: cardiopulmonary resuscitation; ICU: intensive care unit; mSOFA: modified Sequential Organ Failure Assessment score

## References

1. Raith EP, Udy AA, Bailey M, et al. Prognostic Accuracy of the SOFA Score, SIRS Criteria, and qSOFA Score for In-Hospital Mortality Among Adults With Suspected Infection Admitted to the Intensive Care Unit. *JAMA* 2017;317:290-300.
2. Jentzer JC, Bennett C, Wiley BM, et al. Predictive Value of the Sequential Organ Failure Assessment Score for Mortality in a Contemporary Cardiac Intensive Care Unit Population. *J Am Heart Assoc* 2018;7.
3. Aakre C, Franco PM, Ferreyra M, Kitson J, Li M, Herasevich V. Prospective validation of a near real-time EHR-integrated automated SOFA score calculator. *Int J Med Inform* 2017;103:1-6.
