# Supplementary material for: In-hospital cardiac arrest in critically ill patients with covid-19: multicenter cohort study
Source: PubMed Central journal article supplement — BMJ. 2020 Sep 30;371:m3513. doi: 10.1136/bmj.m3513 (PMC7525342; doi:10.1136/bmj.m3513), 2020-09-30
Supplement: hays060127.ww2.pdf [file hays060127.ww2.pdf]

## STOP-COVID: Study of the Treatment and Outcomes in critically ill Patients with COVID-19

Codebook ▾

### Data Dictionary Codebook

08/18/2020 3:31 pm

[^ Collapse all instruments](#)

| #                                                                                                       | Variable / Field Name                                              | Field Label<br><i>Field Note</i>                                                                                                                                                                                                                                                                                                                                                                                                                                                                                                                                                                                                                                                                     | Field Attributes (Field Type, Validation, Choices, Calculations, etc.)                                        |   |     |   |    |
|---------------------------------------------------------------------------------------------------------|--------------------------------------------------------------------|------------------------------------------------------------------------------------------------------------------------------------------------------------------------------------------------------------------------------------------------------------------------------------------------------------------------------------------------------------------------------------------------------------------------------------------------------------------------------------------------------------------------------------------------------------------------------------------------------------------------------------------------------------------------------------------------------|---------------------------------------------------------------------------------------------------------------|---|-----|---|----|
| Instrument: <b>Confirmation of eligibility</b> (confirmation_of_eligibility) <a href="#">^ Collapse</a> |                                                                    |                                                                                                                                                                                                                                                                                                                                                                                                                                                                                                                                                                                                                                                                                                      |                                                                                                               |   |     |   |    |
| 1                                                                                                       | study_id                                                           | Study ID                                                                                                                                                                                                                                                                                                                                                                                                                                                                                                                                                                                                                                                                                             | text                                                                                                          |   |     |   |    |
| 2                                                                                                       | instructions                                                       | Section Header: <i>The questions in this instrument will confirm whether the patient is eligible</i><br>Once all questions have been answered in an instrument, change the status from "incomplete" to "complete". Supplemental instructions, FAQ, and tips can be downloaded here. Please read this document carefully before you begin entering data. Note, the FAQ section of this document will be updated every 1-2 days.                                                                                                                                                                                                                                                                       | descriptive                                                                                                   |   |     |   |    |
| 3                                                                                                       | lab_converter                                                      | Lab value converter can be downloaded here (to convert the units for CRP, D-Dimer, and lactate, if needed)                                                                                                                                                                                                                                                                                                                                                                                                                                                                                                                                                                                           | descriptive                                                                                                   |   |     |   |    |
| 4                                                                                                       | adult                                                              | Adult aged 18 or older?                                                                                                                                                                                                                                                                                                                                                                                                                                                                                                                                                                                                                                                                              | yesno, Required<br><table border="1"> <tr><td>1</td><td>Yes</td></tr> <tr><td>0</td><td>No</td></tr> </table> | 1 | Yes | 0 | No |
| 1                                                                                                       | Yes                                                                |                                                                                                                                                                                                                                                                                                                                                                                                                                                                                                                                                                                                                                                                                                      |                                                                                                               |   |     |   |    |
| 0                                                                                                       | No                                                                 |                                                                                                                                                                                                                                                                                                                                                                                                                                                                                                                                                                                                                                                                                                      |                                                                                                               |   |     |   |    |
| 5                                                                                                       | not_adult<br>Show the field ONLY if:<br>[adult] = '0'              | STOP, THIS PATIENT IS NOT ELIGIBLE                                                                                                                                                                                                                                                                                                                                                                                                                                                                                                                                                                                                                                                                   | descriptive                                                                                                   |   |     |   |    |
| 6                                                                                                       | covid_confirm<br>Show the field ONLY if:<br>[adult] = '1'          | Laboratory-confirmed diagnosis of COVID-19?                                                                                                                                                                                                                                                                                                                                                                                                                                                                                                                                                                                                                                                          | yesno, Required<br><table border="1"> <tr><td>1</td><td>Yes</td></tr> <tr><td>0</td><td>No</td></tr> </table> | 1 | Yes | 0 | No |
| 1                                                                                                       | Yes                                                                |                                                                                                                                                                                                                                                                                                                                                                                                                                                                                                                                                                                                                                                                                                      |                                                                                                               |   |     |   |    |
| 0                                                                                                       | No                                                                 |                                                                                                                                                                                                                                                                                                                                                                                                                                                                                                                                                                                                                                                                                                      |                                                                                                               |   |     |   |    |
| 7                                                                                                       | not_covid<br>Show the field ONLY if:<br>[covid_confirm] = '0'      | STOP, THIS PATIENT IS NOT ELIGIBLE                                                                                                                                                                                                                                                                                                                                                                                                                                                                                                                                                                                                                                                                   | descriptive                                                                                                   |   |     |   |    |
| 8                                                                                                       | date_covidtest<br>Show the field ONLY if:<br>[covid_confirm] = '1' | Date the positive COVID-19 test was obtained-Refers to the date the patient was tested, not the date the result came back-If multiple tests were sent, provide the date of the initial positive test, even if it was obtained at an outside facility-Ok to use an estimate if exact date unavailable                                                                                                                                                                                                                                                                                                                                                                                                 | text (date_mdy), Required                                                                                     |   |     |   |    |
| 9                                                                                                       | hosp_icu_covid<br>Show the field ONLY if:<br>[covid_confirm] = '1' | Hospitalized in the ICU for illness related to COVID-19? Do not include patients admitted to the ICU for reasons unrelated to COVID-19 who later tested positive on "routine surveillance" only and never showed signs or symptoms consistent with COVID-19. Patients in non-ICU rooms that have been "converted" into ICU rooms for surge capacity are eligible under any of the following conditions: a) being treated by an ICU team b) receiving invasive mechanical ventilation or ECMO c) receiving continuous renal replacement therapy (e.g., CVVH) d) receiving vasopressors/inotropes or mechanical cardiac support (e.g., LVAD) in a room where this would traditionally not be permitted | yesno, Required<br><table border="1"> <tr><td>1</td><td>Yes</td></tr> <tr><td>0</td><td>No</td></tr> </table> | 1 | Yes | 0 | No |
| 1                                                                                                       | Yes                                                                |                                                                                                                                                                                                                                                                                                                                                                                                                                                                                                                                                                                                                                                                                                      |                                                                                                               |   |     |   |    |
| 0                                                                                                       | No                                                                 |                                                                                                                                                                                                                                                                                                                                                                                                                                                                                                                                                                                                                                                                                                      |                                                                                                               |   |     |   |    |
| 10                                                                                                      | not_hosp<br>Show the field ONLY if:<br>[hosp_icu_covid] = '0'      | STOP, THIS PATIENT IS NOT ELIGIBLE                                                                                                                                                                                                                                                                                                                                                                                                                                                                                                                                                                                                                                                                   | descriptive                                                                                                   |   |     |   |    |

|    |                                                                   |                                                   |                                                                                                                                                            |   |            |   |            |   |          |
|----|-------------------------------------------------------------------|---------------------------------------------------|------------------------------------------------------------------------------------------------------------------------------------------------------------|---|------------|---|------------|---|----------|
| 11 | eligible_yes<br>Show the field ONLY if:<br>[hosp_icu_covid] = '1' | THIS PATIENT IS ELIGIBLE, PROCEED WITH DATA ENTRY | descriptive                                                                                                                                                |   |            |   |            |   |          |
| 12 | notes_eligibility                                                 | Additional Notes (if any)                         | notes                                                                                                                                                      |   |            |   |            |   |          |
| 13 | confirmation_of_eligibility_complete                              | Section Header: <i>Form Status</i><br>Complete?   | dropdown<br><table border="1"> <tr><td>0</td><td>Incomplete</td></tr> <tr><td>1</td><td>Unverified</td></tr> <tr><td>2</td><td>Complete</td></tr> </table> | 0 | Incomplete | 1 | Unverified | 2 | Complete |
| 0  | Incomplete                                                        |                                                   |                                                                                                                                                            |   |            |   |            |   |          |
| 1  | Unverified                                                        |                                                   |                                                                                                                                                            |   |            |   |            |   |          |
| 2  | Complete                                                          |                                                   |                                                                                                                                                            |   |            |   |            |   |          |

Instrument: **Institutional Data** (institutional\_data)

[^ Collapse](#)

|    |                                                                    |                                                                                                                                                                                                                                                                                        |                                                                                                                                                            |   |               |   |                     |   |          |
|----|--------------------------------------------------------------------|----------------------------------------------------------------------------------------------------------------------------------------------------------------------------------------------------------------------------------------------------------------------------------------|------------------------------------------------------------------------------------------------------------------------------------------------------------|---|---------------|---|---------------------|---|----------|
| 14 | data_enterer                                                       | Enter your name<br>The name of the person entering data, not the name of the patient                                                                                                                                                                                                   | text, Required                                                                                                                                             |   |               |   |                     |   |          |
| 15 | enterer_email                                                      | Enter your email address                                                                                                                                                                                                                                                               | text, Required                                                                                                                                             |   |               |   |                     |   |          |
| 16 | hospital_type                                                      | Was the patient admitted to the main hospital within your medical center, or to a satellite/affiliate of the main hospital? If admitted to one hospital and then transferred to another, please review the answer to Question 7 in the FAQ section of the REDCap instructions document | radio, Required<br><table border="1"> <tr><td>1</td><td>Main Hospital</td></tr> <tr><td>2</td><td>Satellite/affiliate</td></tr> </table>                   | 1 | Main Hospital | 2 | Satellite/affiliate |   |          |
| 1  | Main Hospital                                                      |                                                                                                                                                                                                                                                                                        |                                                                                                                                                            |   |               |   |                     |   |          |
| 2  | Satellite/affiliate                                                |                                                                                                                                                                                                                                                                                        |                                                                                                                                                            |   |               |   |                     |   |          |
| 17 | main_name<br>Show the field ONLY if:<br>[hospital_type] = '1'      | Enter name of the main hospital                                                                                                                                                                                                                                                        | text, Required                                                                                                                                             |   |               |   |                     |   |          |
| 18 | affiliate_name<br>Show the field ONLY if:<br>[hospital_type] = '2' | Enter name of satellite/affiliate                                                                                                                                                                                                                                                      | text, Required                                                                                                                                             |   |               |   |                     |   |          |
| 19 | number_beds                                                        | How many regular adult ICU beds does this hospital have? Do not include surge capacity beds-If the patient was admitted to a satellite/affiliate hospital, only enter the #ICU beds at that specific site                                                                              | text (integer, Min: 1, Max: 500), Required                                                                                                                 |   |               |   |                     |   |          |
| 20 | state                                                              | Indicate the state (2-letter abbreviation) in which the hospital is located                                                                                                                                                                                                            | text (alpha_only), Required                                                                                                                                |   |               |   |                     |   |          |
| 21 | notes_institute                                                    | Additional Notes (if any)                                                                                                                                                                                                                                                              | notes                                                                                                                                                      |   |               |   |                     |   |          |
| 22 | institutional_data_complete                                        | Section Header: <i>Form Status</i><br>Complete?                                                                                                                                                                                                                                        | dropdown<br><table border="1"> <tr><td>0</td><td>Incomplete</td></tr> <tr><td>1</td><td>Unverified</td></tr> <tr><td>2</td><td>Complete</td></tr> </table> | 0 | Incomplete    | 1 | Unverified          | 2 | Complete |
| 0  | Incomplete                                                         |                                                                                                                                                                                                                                                                                        |                                                                                                                                                            |   |               |   |                     |   |          |
| 1  | Unverified                                                         |                                                                                                                                                                                                                                                                                        |                                                                                                                                                            |   |               |   |                     |   |          |
| 2  | Complete                                                           |                                                                                                                                                                                                                                                                                        |                                                                                                                                                            |   |               |   |                     |   |          |

Instrument: **Demographics, Symptoms, Comorbidities, Home Medications** (demographics\_symptoms\_comorbidities\_home\_medication)

[^ Collapse](#)

|    |                        |                |                                                                                                                                                                                                     |   |                    |   |                        |   |                        |
|----|------------------------|----------------|-----------------------------------------------------------------------------------------------------------------------------------------------------------------------------------------------------|---|--------------------|---|------------------------|---|------------------------|
| 23 | age                    | Age (in years) | text (number, Min: 18, Max: 115), Required                                                                                                                                                          |   |                    |   |                        |   |                        |
| 24 | male                   | Gender         | radio, Required<br><table border="1"> <tr><td>1</td><td>Male</td></tr> <tr><td>2</td><td>Female</td></tr> </table>                                                                                  | 1 | Male               | 2 | Female                 |   |                        |
| 1  | Male                   |                |                                                                                                                                                                                                     |   |                    |   |                        |   |                        |
| 2  | Female                 |                |                                                                                                                                                                                                     |   |                    |   |                        |   |                        |
| 25 | ethnicity              | Ethnicity      | radio, Required<br><table border="1"> <tr><td>0</td><td>Hispanic or Latino</td></tr> <tr><td>1</td><td>Not Hispanic or Latino</td></tr> <tr><td>2</td><td>Unknown / Not Reported</td></tr> </table> | 0 | Hispanic or Latino | 1 | Not Hispanic or Latino | 2 | Unknown / Not Reported |
| 0  | Hispanic or Latino     |                |                                                                                                                                                                                                     |   |                    |   |                        |   |                        |
| 1  | Not Hispanic or Latino |                |                                                                                                                                                                                                     |   |                    |   |                        |   |                        |
| 2  | Unknown / Not Reported |                |                                                                                                                                                                                                     |   |                    |   |                        |   |                        |

|    |                                                                                                                                            |                                                                                                   |                                                                                                                                                                                                                                                                                                                                                                                                                                                                            |   |                   |   |                                  |   |                                                                        |   |                                          |   |                                           |   |                    |   |                        |
|----|--------------------------------------------------------------------------------------------------------------------------------------------|---------------------------------------------------------------------------------------------------|----------------------------------------------------------------------------------------------------------------------------------------------------------------------------------------------------------------------------------------------------------------------------------------------------------------------------------------------------------------------------------------------------------------------------------------------------------------------------|---|-------------------|---|----------------------------------|---|------------------------------------------------------------------------|---|------------------------------------------|---|-------------------------------------------|---|--------------------|---|------------------------|
| 26 | race                                                                                                                                       | RaceDo not select, "Unknown / Not Reported" unless this information is truly unavailable          | radio, Required<br><table border="1"> <tr><td>1</td><td>White</td></tr> <tr><td>2</td><td>Black or African American</td></tr> <tr><td>3</td><td>Asian</td></tr> <tr><td>4</td><td>American Indian/Alaska Native</td></tr> <tr><td>5</td><td>Native Hawaiian or Other Pacific Islander</td></tr> <tr><td>6</td><td>More Than One Race</td></tr> <tr><td>7</td><td>Unknown / Not Reported</td></tr> </table>                                                                 | 1 | White             | 2 | Black or African American        | 3 | Asian                                                                  | 4 | American Indian/Alaska Native            | 5 | Native Hawaiian or Other Pacific Islander | 6 | More Than One Race | 7 | Unknown / Not Reported |
| 1  | White                                                                                                                                      |                                                                                                   |                                                                                                                                                                                                                                                                                                                                                                                                                                                                            |   |                   |   |                                  |   |                                                                        |   |                                          |   |                                           |   |                    |   |                        |
| 2  | Black or African American                                                                                                                  |                                                                                                   |                                                                                                                                                                                                                                                                                                                                                                                                                                                                            |   |                   |   |                                  |   |                                                                        |   |                                          |   |                                           |   |                    |   |                        |
| 3  | Asian                                                                                                                                      |                                                                                                   |                                                                                                                                                                                                                                                                                                                                                                                                                                                                            |   |                   |   |                                  |   |                                                                        |   |                                          |   |                                           |   |                    |   |                        |
| 4  | American Indian/Alaska Native                                                                                                              |                                                                                                   |                                                                                                                                                                                                                                                                                                                                                                                                                                                                            |   |                   |   |                                  |   |                                                                        |   |                                          |   |                                           |   |                    |   |                        |
| 5  | Native Hawaiian or Other Pacific Islander                                                                                                  |                                                                                                   |                                                                                                                                                                                                                                                                                                                                                                                                                                                                            |   |                   |   |                                  |   |                                                                        |   |                                          |   |                                           |   |                    |   |                        |
| 6  | More Than One Race                                                                                                                         |                                                                                                   |                                                                                                                                                                                                                                                                                                                                                                                                                                                                            |   |                   |   |                                  |   |                                                                        |   |                                          |   |                                           |   |                    |   |                        |
| 7  | Unknown / Not Reported                                                                                                                     |                                                                                                   |                                                                                                                                                                                                                                                                                                                                                                                                                                                                            |   |                   |   |                                  |   |                                                                        |   |                                          |   |                                           |   |                    |   |                        |
| 27 | pregnant<br>Show the field ONLY if:<br>[male] = '2'                                                                                        | Pregnant at the time of ICU admission?                                                            | yesno, Required<br><table border="1"> <tr><td>1</td><td>Yes</td></tr> <tr><td>0</td><td>No</td></tr> </table>                                                                                                                                                                                                                                                                                                                                                              | 1 | Yes               | 0 | No                               |   |                                                                        |   |                                          |   |                                           |   |                    |   |                        |
| 1  | Yes                                                                                                                                        |                                                                                                   |                                                                                                                                                                                                                                                                                                                                                                                                                                                                            |   |                   |   |                                  |   |                                                                        |   |                                          |   |                                           |   |                    |   |                        |
| 0  | No                                                                                                                                         |                                                                                                   |                                                                                                                                                                                                                                                                                                                                                                                                                                                                            |   |                   |   |                                  |   |                                                                        |   |                                          |   |                                           |   |                    |   |                        |
| 28 | weeks_preg<br>Show the field ONLY if:<br>[pregnant] = '1'                                                                                  | How many weeks pregnant on ICU admission?<br><i>Round up or down to the nearest integer value</i> | text (integer, Min: 0, Max: 42), Required                                                                                                                                                                                                                                                                                                                                                                                                                                  |   |                   |   |                                  |   |                                                                        |   |                                          |   |                                           |   |                    |   |                        |
| 29 | due_date<br>Show the field ONLY if:<br>[pregnant] = '1'                                                                                    | Enter the patient's estimated date of confinementAlso known as the patient's "due" date           | text (date_mdy), Required                                                                                                                                                                                                                                                                                                                                                                                                                                                  |   |                   |   |                                  |   |                                                                        |   |                                          |   |                                           |   |                    |   |                        |
| 30 | delivery<br>Show the field ONLY if:<br>[pregnant] = '1'                                                                                    | Delivery during the critical illness hospitalization?If termination of pregnancy, select "yes"    | yesno, Required<br><table border="1"> <tr><td>1</td><td>Yes</td></tr> <tr><td>0</td><td>No</td></tr> </table>                                                                                                                                                                                                                                                                                                                                                              | 1 | Yes               | 0 | No                               |   |                                                                        |   |                                          |   |                                           |   |                    |   |                        |
| 1  | Yes                                                                                                                                        |                                                                                                   |                                                                                                                                                                                                                                                                                                                                                                                                                                                                            |   |                   |   |                                  |   |                                                                        |   |                                          |   |                                           |   |                    |   |                        |
| 0  | No                                                                                                                                         |                                                                                                   |                                                                                                                                                                                                                                                                                                                                                                                                                                                                            |   |                   |   |                                  |   |                                                                        |   |                                          |   |                                           |   |                    |   |                        |
| 31 | mode_delivery<br>Show the field ONLY if:<br>[delivery] = '1'                                                                               | Mode of delivery                                                                                  | radio, Required<br><table border="1"> <tr><td>1</td><td>Vaginal</td></tr> <tr><td>2</td><td>Cesarean (c-section)</td></tr> <tr><td>3</td><td>Vacuum-assisted</td></tr> <tr><td>4</td><td>Forceps-assisted</td></tr> <tr><td>5</td><td>Termination of pregnancy</td></tr> </table>                                                                                                                                                                                          | 1 | Vaginal           | 2 | Cesarean (c-section)             | 3 | Vacuum-assisted                                                        | 4 | Forceps-assisted                         | 5 | Termination of pregnancy                  |   |                    |   |                        |
| 1  | Vaginal                                                                                                                                    |                                                                                                   |                                                                                                                                                                                                                                                                                                                                                                                                                                                                            |   |                   |   |                                  |   |                                                                        |   |                                          |   |                                           |   |                    |   |                        |
| 2  | Cesarean (c-section)                                                                                                                       |                                                                                                   |                                                                                                                                                                                                                                                                                                                                                                                                                                                                            |   |                   |   |                                  |   |                                                                        |   |                                          |   |                                           |   |                    |   |                        |
| 3  | Vacuum-assisted                                                                                                                            |                                                                                                   |                                                                                                                                                                                                                                                                                                                                                                                                                                                                            |   |                   |   |                                  |   |                                                                        |   |                                          |   |                                           |   |                    |   |                        |
| 4  | Forceps-assisted                                                                                                                           |                                                                                                   |                                                                                                                                                                                                                                                                                                                                                                                                                                                                            |   |                   |   |                                  |   |                                                                        |   |                                          |   |                                           |   |                    |   |                        |
| 5  | Termination of pregnancy                                                                                                                   |                                                                                                   |                                                                                                                                                                                                                                                                                                                                                                                                                                                                            |   |                   |   |                                  |   |                                                                        |   |                                          |   |                                           |   |                    |   |                        |
| 32 | fetus_alive<br>Show the field ONLY if:<br>[mode_delivery] = '1' or [mode_delivery] = '2' or [mode_delivery] = '3' or [mode_delivery] = '4' | Fetus alive at delivery?                                                                          | yesno, Required<br><table border="1"> <tr><td>1</td><td>Yes</td></tr> <tr><td>0</td><td>No</td></tr> </table>                                                                                                                                                                                                                                                                                                                                                              | 1 | Yes               | 0 | No                               |   |                                                                        |   |                                          |   |                                           |   |                    |   |                        |
| 1  | Yes                                                                                                                                        |                                                                                                   |                                                                                                                                                                                                                                                                                                                                                                                                                                                                            |   |                   |   |                                  |   |                                                                        |   |                                          |   |                                           |   |                    |   |                        |
| 0  | No                                                                                                                                         |                                                                                                   |                                                                                                                                                                                                                                                                                                                                                                                                                                                                            |   |                   |   |                                  |   |                                                                        |   |                                          |   |                                           |   |                    |   |                        |
| 33 | date_delivery<br>Show the field ONLY if:<br>[delivery] = '1'                                                                               | Date of delivery                                                                                  | text (date_mdy), Required                                                                                                                                                                                                                                                                                                                                                                                                                                                  |   |                   |   |                                  |   |                                                                        |   |                                          |   |                                           |   |                    |   |                        |
| 34 | indication_delivery<br>Show the field ONLY if:<br>[delivery] = '1'                                                                         | Indication for delivery                                                                           | radio, Required<br><table border="1"> <tr><td>1</td><td>Spontaneous labor</td></tr> <tr><td>2</td><td>Spontaneous rupture of membranes</td></tr> <tr><td>3</td><td>Nonreassuring fetal status (e.g., changes in fetal heart rate tracing)</td></tr> <tr><td>4</td><td>Preeclampsia or gestational hypertension</td></tr> <tr><td>5</td><td>Fetal growth restriction</td></tr> <tr><td>6</td><td>Stillbirth</td></tr> <tr><td>7</td><td>Other indication</td></tr> </table> | 1 | Spontaneous labor | 2 | Spontaneous rupture of membranes | 3 | Nonreassuring fetal status (e.g., changes in fetal heart rate tracing) | 4 | Preeclampsia or gestational hypertension | 5 | Fetal growth restriction                  | 6 | Stillbirth         | 7 | Other indication       |
| 1  | Spontaneous labor                                                                                                                          |                                                                                                   |                                                                                                                                                                                                                                                                                                                                                                                                                                                                            |   |                   |   |                                  |   |                                                                        |   |                                          |   |                                           |   |                    |   |                        |
| 2  | Spontaneous rupture of membranes                                                                                                           |                                                                                                   |                                                                                                                                                                                                                                                                                                                                                                                                                                                                            |   |                   |   |                                  |   |                                                                        |   |                                          |   |                                           |   |                    |   |                        |
| 3  | Nonreassuring fetal status (e.g., changes in fetal heart rate tracing)                                                                     |                                                                                                   |                                                                                                                                                                                                                                                                                                                                                                                                                                                                            |   |                   |   |                                  |   |                                                                        |   |                                          |   |                                           |   |                    |   |                        |
| 4  | Preeclampsia or gestational hypertension                                                                                                   |                                                                                                   |                                                                                                                                                                                                                                                                                                                                                                                                                                                                            |   |                   |   |                                  |   |                                                                        |   |                                          |   |                                           |   |                    |   |                        |
| 5  | Fetal growth restriction                                                                                                                   |                                                                                                   |                                                                                                                                                                                                                                                                                                                                                                                                                                                                            |   |                   |   |                                  |   |                                                                        |   |                                          |   |                                           |   |                    |   |                        |
| 6  | Stillbirth                                                                                                                                 |                                                                                                   |                                                                                                                                                                                                                                                                                                                                                                                                                                                                            |   |                   |   |                                  |   |                                                                        |   |                                          |   |                                           |   |                    |   |                        |
| 7  | Other indication                                                                                                                           |                                                                                                   |                                                                                                                                                                                                                                                                                                                                                                                                                                                                            |   |                   |   |                                  |   |                                                                        |   |                                          |   |                                           |   |                    |   |                        |
| 35 | other_delivery<br>Show the field ONLY if:<br>[indication_delivery] = '7'                                                                   | Enter the other indication for delivery                                                           | text, Required                                                                                                                                                                                                                                                                                                                                                                                                                                                             |   |                   |   |                                  |   |                                                                        |   |                                          |   |                                           |   |                    |   |                        |

|    |                                                                                            |                                                                                                                                                                                                                                                                                       |                                                                                                                                                                                                                                                                                                                                                                                                                                                                                                                                                                                                                                                                                                                                                                                                                                                                                                                                                                                                                                                                                                   |   |                              |       |                                        |             |                                   |   |                                            |            |                 |             |                                             |   |             |                  |   |             |          |   |             |       |   |             |        |   |             |                     |    |              |                    |    |              |          |    |              |                       |    |              |                                    |    |              |                    |    |              |                   |
|----|--------------------------------------------------------------------------------------------|---------------------------------------------------------------------------------------------------------------------------------------------------------------------------------------------------------------------------------------------------------------------------------------|---------------------------------------------------------------------------------------------------------------------------------------------------------------------------------------------------------------------------------------------------------------------------------------------------------------------------------------------------------------------------------------------------------------------------------------------------------------------------------------------------------------------------------------------------------------------------------------------------------------------------------------------------------------------------------------------------------------------------------------------------------------------------------------------------------------------------------------------------------------------------------------------------------------------------------------------------------------------------------------------------------------------------------------------------------------------------------------------------|---|------------------------------|-------|----------------------------------------|-------------|-----------------------------------|---|--------------------------------------------|------------|-----------------|-------------|---------------------------------------------|---|-------------|------------------|---|-------------|----------|---|-------------|-------|---|-------------|--------|---|-------------|---------------------|----|--------------|--------------------|----|--------------|----------|----|--------------|-----------------------|----|--------------|------------------------------------|----|--------------|--------------------|----|--------------|-------------------|
| 36 | <p>indication_c_section</p> <p>Show the field ONLY if:<br/>[mode_delivery] = '2'</p>       | <p>Indication for cesarean (c-section) delivery</p>                                                                                                                                                                                                                                   | <p>radio, Required</p> <table border="1"> <tr><td>1</td><td>Failure to progress in labor</td></tr> <tr><td>2</td><td>Nonreassuring fetal heart rate tracing</td></tr> <tr><td>3</td><td>Breech presentation</td></tr> <tr><td>4</td><td>Prior cesarean delivery or uterine surgery</td></tr> <tr><td>5</td><td>Placenta previa</td></tr> <tr><td>6</td><td>Elective in the setting of critical illness</td></tr> <tr><td>7</td><td>Other</td></tr> </table>                                                                                                                                                                                                                                                                                                                                                                                                                                                                                                                                                                                                                                       | 1 | Failure to progress in labor | 2     | Nonreassuring fetal heart rate tracing | 3           | Breech presentation               | 4 | Prior cesarean delivery or uterine surgery | 5          | Placenta previa | 6           | Elective in the setting of critical illness | 7 | Other       |                  |   |             |          |   |             |       |   |             |        |   |             |                     |    |              |                    |    |              |          |    |              |                       |    |              |                                    |    |              |                    |    |              |                   |
| 1  | Failure to progress in labor                                                               |                                                                                                                                                                                                                                                                                       |                                                                                                                                                                                                                                                                                                                                                                                                                                                                                                                                                                                                                                                                                                                                                                                                                                                                                                                                                                                                                                                                                                   |   |                              |       |                                        |             |                                   |   |                                            |            |                 |             |                                             |   |             |                  |   |             |          |   |             |       |   |             |        |   |             |                     |    |              |                    |    |              |          |    |              |                       |    |              |                                    |    |              |                    |    |              |                   |
| 2  | Nonreassuring fetal heart rate tracing                                                     |                                                                                                                                                                                                                                                                                       |                                                                                                                                                                                                                                                                                                                                                                                                                                                                                                                                                                                                                                                                                                                                                                                                                                                                                                                                                                                                                                                                                                   |   |                              |       |                                        |             |                                   |   |                                            |            |                 |             |                                             |   |             |                  |   |             |          |   |             |       |   |             |        |   |             |                     |    |              |                    |    |              |          |    |              |                       |    |              |                                    |    |              |                    |    |              |                   |
| 3  | Breech presentation                                                                        |                                                                                                                                                                                                                                                                                       |                                                                                                                                                                                                                                                                                                                                                                                                                                                                                                                                                                                                                                                                                                                                                                                                                                                                                                                                                                                                                                                                                                   |   |                              |       |                                        |             |                                   |   |                                            |            |                 |             |                                             |   |             |                  |   |             |          |   |             |       |   |             |        |   |             |                     |    |              |                    |    |              |          |    |              |                       |    |              |                                    |    |              |                    |    |              |                   |
| 4  | Prior cesarean delivery or uterine surgery                                                 |                                                                                                                                                                                                                                                                                       |                                                                                                                                                                                                                                                                                                                                                                                                                                                                                                                                                                                                                                                                                                                                                                                                                                                                                                                                                                                                                                                                                                   |   |                              |       |                                        |             |                                   |   |                                            |            |                 |             |                                             |   |             |                  |   |             |          |   |             |       |   |             |        |   |             |                     |    |              |                    |    |              |          |    |              |                       |    |              |                                    |    |              |                    |    |              |                   |
| 5  | Placenta previa                                                                            |                                                                                                                                                                                                                                                                                       |                                                                                                                                                                                                                                                                                                                                                                                                                                                                                                                                                                                                                                                                                                                                                                                                                                                                                                                                                                                                                                                                                                   |   |                              |       |                                        |             |                                   |   |                                            |            |                 |             |                                             |   |             |                  |   |             |          |   |             |       |   |             |        |   |             |                     |    |              |                    |    |              |          |    |              |                       |    |              |                                    |    |              |                    |    |              |                   |
| 6  | Elective in the setting of critical illness                                                |                                                                                                                                                                                                                                                                                       |                                                                                                                                                                                                                                                                                                                                                                                                                                                                                                                                                                                                                                                                                                                                                                                                                                                                                                                                                                                                                                                                                                   |   |                              |       |                                        |             |                                   |   |                                            |            |                 |             |                                             |   |             |                  |   |             |          |   |             |       |   |             |        |   |             |                     |    |              |                    |    |              |          |    |              |                       |    |              |                                    |    |              |                    |    |              |                   |
| 7  | Other                                                                                      |                                                                                                                                                                                                                                                                                       |                                                                                                                                                                                                                                                                                                                                                                                                                                                                                                                                                                                                                                                                                                                                                                                                                                                                                                                                                                                                                                                                                                   |   |                              |       |                                        |             |                                   |   |                                            |            |                 |             |                                             |   |             |                  |   |             |          |   |             |       |   |             |        |   |             |                     |    |              |                    |    |              |          |    |              |                       |    |              |                                    |    |              |                    |    |              |                   |
| 37 | <p>fetus_outcome</p> <p>Show the field ONLY if:<br/>[pregnant] = '1'</p>                   | <p>Enter the outcome of the fetus by the end of the hospitalization (e.g., "both the mother and fetus survived the hospitalization", or "fetus terminated at week XXX due to XXX", etc.)</p>                                                                                          | <p>notes, Required</p>                                                                                                                                                                                                                                                                                                                                                                                                                                                                                                                                                                                                                                                                                                                                                                                                                                                                                                                                                                                                                                                                            |   |                              |       |                                        |             |                                   |   |                                            |            |                 |             |                                             |   |             |                  |   |             |          |   |             |       |   |             |        |   |             |                     |    |              |                    |    |              |          |    |              |                       |    |              |                                    |    |              |                    |    |              |                   |
| 38 | <p>source_admit</p>                                                                        | <p>Source of admission to the ICU</p>                                                                                                                                                                                                                                                 | <p>radio, Required</p> <table border="1"> <tr><td>1</td><td>Emergency department</td></tr> <tr><td>2</td><td>Hospital ward</td></tr> <tr><td>3</td><td>Transfer from another hospital</td></tr> <tr><td>4</td><td>Other</td></tr> </table>                                                                                                                                                                                                                                                                                                                                                                                                                                                                                                                                                                                                                                                                                                                                                                                                                                                        | 1 | Emergency department         | 2     | Hospital ward                          | 3           | Transfer from another hospital    | 4 | Other                                      |            |                 |             |                                             |   |             |                  |   |             |          |   |             |       |   |             |        |   |             |                     |    |              |                    |    |              |          |    |              |                       |    |              |                                    |    |              |                    |    |              |                   |
| 1  | Emergency department                                                                       |                                                                                                                                                                                                                                                                                       |                                                                                                                                                                                                                                                                                                                                                                                                                                                                                                                                                                                                                                                                                                                                                                                                                                                                                                                                                                                                                                                                                                   |   |                              |       |                                        |             |                                   |   |                                            |            |                 |             |                                             |   |             |                  |   |             |          |   |             |       |   |             |        |   |             |                     |    |              |                    |    |              |          |    |              |                       |    |              |                                    |    |              |                    |    |              |                   |
| 2  | Hospital ward                                                                              |                                                                                                                                                                                                                                                                                       |                                                                                                                                                                                                                                                                                                                                                                                                                                                                                                                                                                                                                                                                                                                                                                                                                                                                                                                                                                                                                                                                                                   |   |                              |       |                                        |             |                                   |   |                                            |            |                 |             |                                             |   |             |                  |   |             |          |   |             |       |   |             |        |   |             |                     |    |              |                    |    |              |          |    |              |                       |    |              |                                    |    |              |                    |    |              |                   |
| 3  | Transfer from another hospital                                                             |                                                                                                                                                                                                                                                                                       |                                                                                                                                                                                                                                                                                                                                                                                                                                                                                                                                                                                                                                                                                                                                                                                                                                                                                                                                                                                                                                                                                                   |   |                              |       |                                        |             |                                   |   |                                            |            |                 |             |                                             |   |             |                  |   |             |          |   |             |       |   |             |        |   |             |                     |    |              |                    |    |              |          |    |              |                       |    |              |                                    |    |              |                    |    |              |                   |
| 4  | Other                                                                                      |                                                                                                                                                                                                                                                                                       |                                                                                                                                                                                                                                                                                                                                                                                                                                                                                                                                                                                                                                                                                                                                                                                                                                                                                                                                                                                                                                                                                                   |   |                              |       |                                        |             |                                   |   |                                            |            |                 |             |                                             |   |             |                  |   |             |          |   |             |       |   |             |        |   |             |                     |    |              |                    |    |              |          |    |              |                       |    |              |                                    |    |              |                    |    |              |                   |
| 39 | <p>infection_setting</p>                                                                   | <p>Suspected setting in which COVID-19 infection occurred*Healthcare worker is defined as a doctor, nurse, technician, or other medical professional who provides direct care to patients (do not include ancillary staff such as clerks, pharmacists, or kitchen/cleaning staff)</p> | <p>radio, Required</p> <table border="1"> <tr><td>1</td><td>Community-acquired</td></tr> <tr><td>2</td><td>Nosocomial</td></tr> <tr><td>3</td><td>Occupational (healthcare worker)*</td></tr> <tr><td>4</td><td>Unknown</td></tr> </table>                                                                                                                                                                                                                                                                                                                                                                                                                                                                                                                                                                                                                                                                                                                                                                                                                                                        | 1 | Community-acquired           | 2     | Nosocomial                             | 3           | Occupational (healthcare worker)* | 4 | Unknown                                    |            |                 |             |                                             |   |             |                  |   |             |          |   |             |       |   |             |        |   |             |                     |    |              |                    |    |              |          |    |              |                       |    |              |                                    |    |              |                    |    |              |                   |
| 1  | Community-acquired                                                                         |                                                                                                                                                                                                                                                                                       |                                                                                                                                                                                                                                                                                                                                                                                                                                                                                                                                                                                                                                                                                                                                                                                                                                                                                                                                                                                                                                                                                                   |   |                              |       |                                        |             |                                   |   |                                            |            |                 |             |                                             |   |             |                  |   |             |          |   |             |       |   |             |        |   |             |                     |    |              |                    |    |              |          |    |              |                       |    |              |                                    |    |              |                    |    |              |                   |
| 2  | Nosocomial                                                                                 |                                                                                                                                                                                                                                                                                       |                                                                                                                                                                                                                                                                                                                                                                                                                                                                                                                                                                                                                                                                                                                                                                                                                                                                                                                                                                                                                                                                                                   |   |                              |       |                                        |             |                                   |   |                                            |            |                 |             |                                             |   |             |                  |   |             |          |   |             |       |   |             |        |   |             |                     |    |              |                    |    |              |          |    |              |                       |    |              |                                    |    |              |                    |    |              |                   |
| 3  | Occupational (healthcare worker)*                                                          |                                                                                                                                                                                                                                                                                       |                                                                                                                                                                                                                                                                                                                                                                                                                                                                                                                                                                                                                                                                                                                                                                                                                                                                                                                                                                                                                                                                                                   |   |                              |       |                                        |             |                                   |   |                                            |            |                 |             |                                             |   |             |                  |   |             |          |   |             |       |   |             |        |   |             |                     |    |              |                    |    |              |          |    |              |                       |    |              |                                    |    |              |                    |    |              |                   |
| 4  | Unknown                                                                                    |                                                                                                                                                                                                                                                                                       |                                                                                                                                                                                                                                                                                                                                                                                                                                                                                                                                                                                                                                                                                                                                                                                                                                                                                                                                                                                                                                                                                                   |   |                              |       |                                        |             |                                   |   |                                            |            |                 |             |                                             |   |             |                  |   |             |          |   |             |       |   |             |        |   |             |                     |    |              |                    |    |              |          |    |              |                       |    |              |                                    |    |              |                    |    |              |                   |
| 40 | <p>type_healthcare_worker</p> <p>Show the field ONLY if:<br/>[infection_setting] = '3'</p> | <p>Type of healthcare worker</p>                                                                                                                                                                                                                                                      | <p>radio, Required</p> <table border="1"> <tr><td>1</td><td>Doctor</td></tr> <tr><td>2</td><td>Nurse</td></tr> <tr><td>3</td><td>Other</td></tr> </table>                                                                                                                                                                                                                                                                                                                                                                                                                                                                                                                                                                                                                                                                                                                                                                                                                                                                                                                                         | 1 | Doctor                       | 2     | Nurse                                  | 3           | Other                             |   |                                            |            |                 |             |                                             |   |             |                  |   |             |          |   |             |       |   |             |        |   |             |                     |    |              |                    |    |              |          |    |              |                       |    |              |                                    |    |              |                    |    |              |                   |
| 1  | Doctor                                                                                     |                                                                                                                                                                                                                                                                                       |                                                                                                                                                                                                                                                                                                                                                                                                                                                                                                                                                                                                                                                                                                                                                                                                                                                                                                                                                                                                                                                                                                   |   |                              |       |                                        |             |                                   |   |                                            |            |                 |             |                                             |   |             |                  |   |             |          |   |             |       |   |             |        |   |             |                     |    |              |                    |    |              |          |    |              |                       |    |              |                                    |    |              |                    |    |              |                   |
| 2  | Nurse                                                                                      |                                                                                                                                                                                                                                                                                       |                                                                                                                                                                                                                                                                                                                                                                                                                                                                                                                                                                                                                                                                                                                                                                                                                                                                                                                                                                                                                                                                                                   |   |                              |       |                                        |             |                                   |   |                                            |            |                 |             |                                             |   |             |                  |   |             |          |   |             |       |   |             |        |   |             |                     |    |              |                    |    |              |          |    |              |                       |    |              |                                    |    |              |                    |    |              |                   |
| 3  | Other                                                                                      |                                                                                                                                                                                                                                                                                       |                                                                                                                                                                                                                                                                                                                                                                                                                                                                                                                                                                                                                                                                                                                                                                                                                                                                                                                                                                                                                                                                                                   |   |                              |       |                                        |             |                                   |   |                                            |            |                 |             |                                             |   |             |                  |   |             |          |   |             |       |   |             |        |   |             |                     |    |              |                    |    |              |          |    |              |                       |    |              |                                    |    |              |                    |    |              |                   |
| 41 | <p>date_symptoms</p>                                                                       | <p>Date symptoms first began?Ok to use an estimate if exact date is unavailable</p>                                                                                                                                                                                                   | <p>text (date_mdy), Required</p>                                                                                                                                                                                                                                                                                                                                                                                                                                                                                                                                                                                                                                                                                                                                                                                                                                                                                                                                                                                                                                                                  |   |                              |       |                                        |             |                                   |   |                                            |            |                 |             |                                             |   |             |                  |   |             |          |   |             |       |   |             |        |   |             |                     |    |              |                    |    |              |          |    |              |                       |    |              |                                    |    |              |                    |    |              |                   |
| 42 | <p>symptoms</p>                                                                            | <p>Symptom(s) that began prior to ICU admission (select all that apply)Include symptoms that began at home as well as those that began in the hospital prior to ICU admission</p>                                                                                                     | <p>checkbox, Required</p> <table border="1"> <tr><td>1</td><td>symptoms__1</td><td>Cough</td></tr> <tr><td>2</td><td>symptoms__2</td><td>Sputum production</td></tr> <tr><td>3</td><td>symptoms__3</td><td>Hemoptysis</td></tr> <tr><td>4</td><td>symptoms__4</td><td>Sore throat</td></tr> <tr><td>5</td><td>symptoms__5</td><td>Nasal congestion</td></tr> <tr><td>6</td><td>symptoms__6</td><td>Headache</td></tr> <tr><td>7</td><td>symptoms__7</td><td>Fever</td></tr> <tr><td>8</td><td>symptoms__8</td><td>Chills</td></tr> <tr><td>9</td><td>symptoms__9</td><td>Shortness of breath</td></tr> <tr><td>10</td><td>symptoms__10</td><td>Nausea or vomiting</td></tr> <tr><td>11</td><td>symptoms__11</td><td>Diarrhea</td></tr> <tr><td>12</td><td>symptoms__12</td><td>Myalgia or arthralgia</td></tr> <tr><td>13</td><td>symptoms__13</td><td>Confusion or altered mental status</td></tr> <tr><td>14</td><td>symptoms__14</td><td>Fatigue or malaise</td></tr> <tr><td>15</td><td>symptoms__15</td><td>None of the above</td></tr> </table> <p>Field Annotation: @NONEOFTHEABOVE=15</p> | 1 | symptoms__1                  | Cough | 2                                      | symptoms__2 | Sputum production                 | 3 | symptoms__3                                | Hemoptysis | 4               | symptoms__4 | Sore throat                                 | 5 | symptoms__5 | Nasal congestion | 6 | symptoms__6 | Headache | 7 | symptoms__7 | Fever | 8 | symptoms__8 | Chills | 9 | symptoms__9 | Shortness of breath | 10 | symptoms__10 | Nausea or vomiting | 11 | symptoms__11 | Diarrhea | 12 | symptoms__12 | Myalgia or arthralgia | 13 | symptoms__13 | Confusion or altered mental status | 14 | symptoms__14 | Fatigue or malaise | 15 | symptoms__15 | None of the above |
| 1  | symptoms__1                                                                                | Cough                                                                                                                                                                                                                                                                                 |                                                                                                                                                                                                                                                                                                                                                                                                                                                                                                                                                                                                                                                                                                                                                                                                                                                                                                                                                                                                                                                                                                   |   |                              |       |                                        |             |                                   |   |                                            |            |                 |             |                                             |   |             |                  |   |             |          |   |             |       |   |             |        |   |             |                     |    |              |                    |    |              |          |    |              |                       |    |              |                                    |    |              |                    |    |              |                   |
| 2  | symptoms__2                                                                                | Sputum production                                                                                                                                                                                                                                                                     |                                                                                                                                                                                                                                                                                                                                                                                                                                                                                                                                                                                                                                                                                                                                                                                                                                                                                                                                                                                                                                                                                                   |   |                              |       |                                        |             |                                   |   |                                            |            |                 |             |                                             |   |             |                  |   |             |          |   |             |       |   |             |        |   |             |                     |    |              |                    |    |              |          |    |              |                       |    |              |                                    |    |              |                    |    |              |                   |
| 3  | symptoms__3                                                                                | Hemoptysis                                                                                                                                                                                                                                                                            |                                                                                                                                                                                                                                                                                                                                                                                                                                                                                                                                                                                                                                                                                                                                                                                                                                                                                                                                                                                                                                                                                                   |   |                              |       |                                        |             |                                   |   |                                            |            |                 |             |                                             |   |             |                  |   |             |          |   |             |       |   |             |        |   |             |                     |    |              |                    |    |              |          |    |              |                       |    |              |                                    |    |              |                    |    |              |                   |
| 4  | symptoms__4                                                                                | Sore throat                                                                                                                                                                                                                                                                           |                                                                                                                                                                                                                                                                                                                                                                                                                                                                                                                                                                                                                                                                                                                                                                                                                                                                                                                                                                                                                                                                                                   |   |                              |       |                                        |             |                                   |   |                                            |            |                 |             |                                             |   |             |                  |   |             |          |   |             |       |   |             |        |   |             |                     |    |              |                    |    |              |          |    |              |                       |    |              |                                    |    |              |                    |    |              |                   |
| 5  | symptoms__5                                                                                | Nasal congestion                                                                                                                                                                                                                                                                      |                                                                                                                                                                                                                                                                                                                                                                                                                                                                                                                                                                                                                                                                                                                                                                                                                                                                                                                                                                                                                                                                                                   |   |                              |       |                                        |             |                                   |   |                                            |            |                 |             |                                             |   |             |                  |   |             |          |   |             |       |   |             |        |   |             |                     |    |              |                    |    |              |          |    |              |                       |    |              |                                    |    |              |                    |    |              |                   |
| 6  | symptoms__6                                                                                | Headache                                                                                                                                                                                                                                                                              |                                                                                                                                                                                                                                                                                                                                                                                                                                                                                                                                                                                                                                                                                                                                                                                                                                                                                                                                                                                                                                                                                                   |   |                              |       |                                        |             |                                   |   |                                            |            |                 |             |                                             |   |             |                  |   |             |          |   |             |       |   |             |        |   |             |                     |    |              |                    |    |              |          |    |              |                       |    |              |                                    |    |              |                    |    |              |                   |
| 7  | symptoms__7                                                                                | Fever                                                                                                                                                                                                                                                                                 |                                                                                                                                                                                                                                                                                                                                                                                                                                                                                                                                                                                                                                                                                                                                                                                                                                                                                                                                                                                                                                                                                                   |   |                              |       |                                        |             |                                   |   |                                            |            |                 |             |                                             |   |             |                  |   |             |          |   |             |       |   |             |        |   |             |                     |    |              |                    |    |              |          |    |              |                       |    |              |                                    |    |              |                    |    |              |                   |
| 8  | symptoms__8                                                                                | Chills                                                                                                                                                                                                                                                                                |                                                                                                                                                                                                                                                                                                                                                                                                                                                                                                                                                                                                                                                                                                                                                                                                                                                                                                                                                                                                                                                                                                   |   |                              |       |                                        |             |                                   |   |                                            |            |                 |             |                                             |   |             |                  |   |             |          |   |             |       |   |             |        |   |             |                     |    |              |                    |    |              |          |    |              |                       |    |              |                                    |    |              |                    |    |              |                   |
| 9  | symptoms__9                                                                                | Shortness of breath                                                                                                                                                                                                                                                                   |                                                                                                                                                                                                                                                                                                                                                                                                                                                                                                                                                                                                                                                                                                                                                                                                                                                                                                                                                                                                                                                                                                   |   |                              |       |                                        |             |                                   |   |                                            |            |                 |             |                                             |   |             |                  |   |             |          |   |             |       |   |             |        |   |             |                     |    |              |                    |    |              |          |    |              |                       |    |              |                                    |    |              |                    |    |              |                   |
| 10 | symptoms__10                                                                               | Nausea or vomiting                                                                                                                                                                                                                                                                    |                                                                                                                                                                                                                                                                                                                                                                                                                                                                                                                                                                                                                                                                                                                                                                                                                                                                                                                                                                                                                                                                                                   |   |                              |       |                                        |             |                                   |   |                                            |            |                 |             |                                             |   |             |                  |   |             |          |   |             |       |   |             |        |   |             |                     |    |              |                    |    |              |          |    |              |                       |    |              |                                    |    |              |                    |    |              |                   |
| 11 | symptoms__11                                                                               | Diarrhea                                                                                                                                                                                                                                                                              |                                                                                                                                                                                                                                                                                                                                                                                                                                                                                                                                                                                                                                                                                                                                                                                                                                                                                                                                                                                                                                                                                                   |   |                              |       |                                        |             |                                   |   |                                            |            |                 |             |                                             |   |             |                  |   |             |          |   |             |       |   |             |        |   |             |                     |    |              |                    |    |              |          |    |              |                       |    |              |                                    |    |              |                    |    |              |                   |
| 12 | symptoms__12                                                                               | Myalgia or arthralgia                                                                                                                                                                                                                                                                 |                                                                                                                                                                                                                                                                                                                                                                                                                                                                                                                                                                                                                                                                                                                                                                                                                                                                                                                                                                                                                                                                                                   |   |                              |       |                                        |             |                                   |   |                                            |            |                 |             |                                             |   |             |                  |   |             |          |   |             |       |   |             |        |   |             |                     |    |              |                    |    |              |          |    |              |                       |    |              |                                    |    |              |                    |    |              |                   |
| 13 | symptoms__13                                                                               | Confusion or altered mental status                                                                                                                                                                                                                                                    |                                                                                                                                                                                                                                                                                                                                                                                                                                                                                                                                                                                                                                                                                                                                                                                                                                                                                                                                                                                                                                                                                                   |   |                              |       |                                        |             |                                   |   |                                            |            |                 |             |                                             |   |             |                  |   |             |          |   |             |       |   |             |        |   |             |                     |    |              |                    |    |              |          |    |              |                       |    |              |                                    |    |              |                    |    |              |                   |
| 14 | symptoms__14                                                                               | Fatigue or malaise                                                                                                                                                                                                                                                                    |                                                                                                                                                                                                                                                                                                                                                                                                                                                                                                                                                                                                                                                                                                                                                                                                                                                                                                                                                                                                                                                                                                   |   |                              |       |                                        |             |                                   |   |                                            |            |                 |             |                                             |   |             |                  |   |             |          |   |             |       |   |             |        |   |             |                     |    |              |                    |    |              |          |    |              |                       |    |              |                                    |    |              |                    |    |              |                   |
| 15 | symptoms__15                                                                               | None of the above                                                                                                                                                                                                                                                                     |                                                                                                                                                                                                                                                                                                                                                                                                                                                                                                                                                                                                                                                                                                                                                                                                                                                                                                                                                                                                                                                                                                   |   |                              |       |                                        |             |                                   |   |                                            |            |                 |             |                                             |   |             |                  |   |             |          |   |             |       |   |             |        |   |             |                     |    |              |                    |    |              |          |    |              |                       |    |              |                                    |    |              |                    |    |              |                   |
| 43 | <p>other_symptoms</p>                                                                      | <p>Other symptom(s) that began prior to ICU admission? Examples include chest pain/tightness, dizziness, and anosmia (lack of smell)</p>                                                                                                                                              | <p>notes</p>                                                                                                                                                                                                                                                                                                                                                                                                                                                                                                                                                                                                                                                                                                                                                                                                                                                                                                                                                                                                                                                                                      |   |                              |       |                                        |             |                                   |   |                                            |            |                 |             |                                             |   |             |                  |   |             |          |   |             |       |   |             |        |   |             |                     |    |              |                    |    |              |          |    |              |                       |    |              |                                    |    |              |                    |    |              |                   |

|    |                                                                                 |                                                                                                                                                                                                         |                                                                                                                                                                                                                                                                                                                                                                                                                                                                                                                                                                                                                                                                                                                                                                                                                                                                                        |   |                        |                   |                       |                        |                |   |                        |                                |   |                        |                                  |   |                        |                             |   |                        |      |   |                        |        |   |                        |                    |   |                        |                   |
|----|---------------------------------------------------------------------------------|---------------------------------------------------------------------------------------------------------------------------------------------------------------------------------------------------------|----------------------------------------------------------------------------------------------------------------------------------------------------------------------------------------------------------------------------------------------------------------------------------------------------------------------------------------------------------------------------------------------------------------------------------------------------------------------------------------------------------------------------------------------------------------------------------------------------------------------------------------------------------------------------------------------------------------------------------------------------------------------------------------------------------------------------------------------------------------------------------------|---|------------------------|-------------------|-----------------------|------------------------|----------------|---|------------------------|--------------------------------|---|------------------------|----------------------------------|---|------------------------|-----------------------------|---|------------------------|------|---|------------------------|--------|---|------------------------|--------------------|---|------------------------|-------------------|
| 44 | comorbidity_cv_pulm                                                             | Cardiovascular and pulmonary comorbidities prior to ICU admission*CAD includes any history of angina, myocardial infarction, or coronary artery bypass graft surgery**CHF includes both HFrEF and HFpEF | checkbox, Required<br><table border="1" data-bbox="1044 111 1523 552"> <tr> <td>1</td> <td>comorbidity_cv_pulm__1</td> <td>Diabetes mellitus</td> </tr> <tr> <td>2</td> <td>comorbidity_cv_pulm__2</td> <td>Hypertension</td> </tr> <tr> <td>3</td> <td>comorbidity_cv_pulm__3</td> <td>Coronary artery disease (CAD)*</td> </tr> <tr> <td>4</td> <td>comorbidity_cv_pulm__4</td> <td>Congestive heart failure (CHF)**</td> </tr> <tr> <td>5</td> <td>comorbidity_cv_pulm__5</td> <td>Atrial fibrillation/flutter</td> </tr> <tr> <td>6</td> <td>comorbidity_cv_pulm__6</td> <td>COPD</td> </tr> <tr> <td>7</td> <td>comorbidity_cv_pulm__7</td> <td>Asthma</td> </tr> <tr> <td>8</td> <td>comorbidity_cv_pulm__8</td> <td>Other lung disease</td> </tr> <tr> <td>9</td> <td>comorbidity_cv_pulm__9</td> <td>None of the above</td> </tr> </table> Field Annotation: @NONEOFTHEABOVE=9 | 1 | comorbidity_cv_pulm__1 | Diabetes mellitus | 2                     | comorbidity_cv_pulm__2 | Hypertension   | 3 | comorbidity_cv_pulm__3 | Coronary artery disease (CAD)* | 4 | comorbidity_cv_pulm__4 | Congestive heart failure (CHF)** | 5 | comorbidity_cv_pulm__5 | Atrial fibrillation/flutter | 6 | comorbidity_cv_pulm__6 | COPD | 7 | comorbidity_cv_pulm__7 | Asthma | 8 | comorbidity_cv_pulm__8 | Other lung disease | 9 | comorbidity_cv_pulm__9 | None of the above |
| 1  | comorbidity_cv_pulm__1                                                          | Diabetes mellitus                                                                                                                                                                                       |                                                                                                                                                                                                                                                                                                                                                                                                                                                                                                                                                                                                                                                                                                                                                                                                                                                                                        |   |                        |                   |                       |                        |                |   |                        |                                |   |                        |                                  |   |                        |                             |   |                        |      |   |                        |        |   |                        |                    |   |                        |                   |
| 2  | comorbidity_cv_pulm__2                                                          | Hypertension                                                                                                                                                                                            |                                                                                                                                                                                                                                                                                                                                                                                                                                                                                                                                                                                                                                                                                                                                                                                                                                                                                        |   |                        |                   |                       |                        |                |   |                        |                                |   |                        |                                  |   |                        |                             |   |                        |      |   |                        |        |   |                        |                    |   |                        |                   |
| 3  | comorbidity_cv_pulm__3                                                          | Coronary artery disease (CAD)*                                                                                                                                                                          |                                                                                                                                                                                                                                                                                                                                                                                                                                                                                                                                                                                                                                                                                                                                                                                                                                                                                        |   |                        |                   |                       |                        |                |   |                        |                                |   |                        |                                  |   |                        |                             |   |                        |      |   |                        |        |   |                        |                    |   |                        |                   |
| 4  | comorbidity_cv_pulm__4                                                          | Congestive heart failure (CHF)**                                                                                                                                                                        |                                                                                                                                                                                                                                                                                                                                                                                                                                                                                                                                                                                                                                                                                                                                                                                                                                                                                        |   |                        |                   |                       |                        |                |   |                        |                                |   |                        |                                  |   |                        |                             |   |                        |      |   |                        |        |   |                        |                    |   |                        |                   |
| 5  | comorbidity_cv_pulm__5                                                          | Atrial fibrillation/flutter                                                                                                                                                                             |                                                                                                                                                                                                                                                                                                                                                                                                                                                                                                                                                                                                                                                                                                                                                                                                                                                                                        |   |                        |                   |                       |                        |                |   |                        |                                |   |                        |                                  |   |                        |                             |   |                        |      |   |                        |        |   |                        |                    |   |                        |                   |
| 6  | comorbidity_cv_pulm__6                                                          | COPD                                                                                                                                                                                                    |                                                                                                                                                                                                                                                                                                                                                                                                                                                                                                                                                                                                                                                                                                                                                                                                                                                                                        |   |                        |                   |                       |                        |                |   |                        |                                |   |                        |                                  |   |                        |                             |   |                        |      |   |                        |        |   |                        |                    |   |                        |                   |
| 7  | comorbidity_cv_pulm__7                                                          | Asthma                                                                                                                                                                                                  |                                                                                                                                                                                                                                                                                                                                                                                                                                                                                                                                                                                                                                                                                                                                                                                                                                                                                        |   |                        |                   |                       |                        |                |   |                        |                                |   |                        |                                  |   |                        |                             |   |                        |      |   |                        |        |   |                        |                    |   |                        |                   |
| 8  | comorbidity_cv_pulm__8                                                          | Other lung disease                                                                                                                                                                                      |                                                                                                                                                                                                                                                                                                                                                                                                                                                                                                                                                                                                                                                                                                                                                                                                                                                                                        |   |                        |                   |                       |                        |                |   |                        |                                |   |                        |                                  |   |                        |                             |   |                        |      |   |                        |        |   |                        |                    |   |                        |                   |
| 9  | comorbidity_cv_pulm__9                                                          | None of the above                                                                                                                                                                                       |                                                                                                                                                                                                                                                                                                                                                                                                                                                                                                                                                                                                                                                                                                                                                                                                                                                                                        |   |                        |                   |                       |                        |                |   |                        |                                |   |                        |                                  |   |                        |                             |   |                        |      |   |                        |        |   |                        |                    |   |                        |                   |
| 45 | iddm_or_niddm<br>Show the field ONLY if:<br>[comorbidity_cv_pulm(1)] = '1'      | Was the diabetes insulin-dependent or non-insulin-dependent?                                                                                                                                            | radio, Required<br><table border="1" data-bbox="1044 644 1295 724"> <tr> <td>1</td> <td>Insulin-dependent</td> </tr> <tr> <td>2</td> <td>Non-insulin-dependent</td> </tr> </table>                                                                                                                                                                                                                                                                                                                                                                                                                                                                                                                                                                                                                                                                                                     | 1 | Insulin-dependent      | 2                 | Non-insulin-dependent |                        |                |   |                        |                                |   |                        |                                  |   |                        |                             |   |                        |      |   |                        |        |   |                        |                    |   |                        |                   |
| 1  | Insulin-dependent                                                               |                                                                                                                                                                                                         |                                                                                                                                                                                                                                                                                                                                                                                                                                                                                                                                                                                                                                                                                                                                                                                                                                                                                        |   |                        |                   |                       |                        |                |   |                        |                                |   |                        |                                  |   |                        |                             |   |                        |      |   |                        |        |   |                        |                    |   |                        |                   |
| 2  | Non-insulin-dependent                                                           |                                                                                                                                                                                                         |                                                                                                                                                                                                                                                                                                                                                                                                                                                                                                                                                                                                                                                                                                                                                                                                                                                                                        |   |                        |                   |                       |                        |                |   |                        |                                |   |                        |                                  |   |                        |                             |   |                        |      |   |                        |        |   |                        |                    |   |                        |                   |
| 46 | other_lung_disease<br>Show the field ONLY if:<br>[comorbidity_cv_pulm(8)] = '1' | Enter the other lung disease                                                                                                                                                                            | text, Required                                                                                                                                                                                                                                                                                                                                                                                                                                                                                                                                                                                                                                                                                                                                                                                                                                                                         |   |                        |                   |                       |                        |                |   |                        |                                |   |                        |                                  |   |                        |                             |   |                        |      |   |                        |        |   |                        |                    |   |                        |                   |
| 47 | smoker                                                                          | Tobacco smoking statusDo not include vaping or smoking of non-tobacco products                                                                                                                          | radio, Required<br><table border="1" data-bbox="1044 873 1230 1035"> <tr> <td>1</td> <td>Non-smoker</td> </tr> <tr> <td>2</td> <td>Former smoker</td> </tr> <tr> <td>3</td> <td>Current smoker</td> </tr> <tr> <td>4</td> <td>Unknown</td> </tr> </table>                                                                                                                                                                                                                                                                                                                                                                                                                                                                                                                                                                                                                              | 1 | Non-smoker             | 2                 | Former smoker         | 3                      | Current smoker | 4 | Unknown                |                                |   |                        |                                  |   |                        |                             |   |                        |      |   |                        |        |   |                        |                    |   |                        |                   |
| 1  | Non-smoker                                                                      |                                                                                                                                                                                                         |                                                                                                                                                                                                                                                                                                                                                                                                                                                                                                                                                                                                                                                                                                                                                                                                                                                                                        |   |                        |                   |                       |                        |                |   |                        |                                |   |                        |                                  |   |                        |                             |   |                        |      |   |                        |        |   |                        |                    |   |                        |                   |
| 2  | Former smoker                                                                   |                                                                                                                                                                                                         |                                                                                                                                                                                                                                                                                                                                                                                                                                                                                                                                                                                                                                                                                                                                                                                                                                                                                        |   |                        |                   |                       |                        |                |   |                        |                                |   |                        |                                  |   |                        |                             |   |                        |      |   |                        |        |   |                        |                    |   |                        |                   |
| 3  | Current smoker                                                                  |                                                                                                                                                                                                         |                                                                                                                                                                                                                                                                                                                                                                                                                                                                                                                                                                                                                                                                                                                                                                                                                                                                                        |   |                        |                   |                       |                        |                |   |                        |                                |   |                        |                                  |   |                        |                             |   |                        |      |   |                        |        |   |                        |                    |   |                        |                   |
| 4  | Unknown                                                                         |                                                                                                                                                                                                         |                                                                                                                                                                                                                                                                                                                                                                                                                                                                                                                                                                                                                                                                                                                                                                                                                                                                                        |   |                        |                   |                       |                        |                |   |                        |                                |   |                        |                                  |   |                        |                             |   |                        |      |   |                        |        |   |                        |                    |   |                        |                   |
| 48 | packyears<br>Show the field ONLY if:<br>[smoker] = '2' or [smoker] = '3'        | How many pack-years of smoking history?If not available enter, "N/A"                                                                                                                                    | text, Required                                                                                                                                                                                                                                                                                                                                                                                                                                                                                                                                                                                                                                                                                                                                                                                                                                                                         |   |                        |                   |                       |                        |                |   |                        |                                |   |                        |                                  |   |                        |                             |   |                        |      |   |                        |        |   |                        |                    |   |                        |                   |
| 49 | alcohol                                                                         | History of alcohol abuse                                                                                                                                                                                | radio, Required<br><table border="1" data-bbox="1044 1211 1174 1329"> <tr> <td>1</td> <td>Yes</td> </tr> <tr> <td>2</td> <td>No</td> </tr> <tr> <td>3</td> <td>Unknown</td> </tr> </table>                                                                                                                                                                                                                                                                                                                                                                                                                                                                                                                                                                                                                                                                                             | 1 | Yes                    | 2                 | No                    | 3                      | Unknown        |   |                        |                                |   |                        |                                  |   |                        |                             |   |                        |      |   |                        |        |   |                        |                    |   |                        |                   |
| 1  | Yes                                                                             |                                                                                                                                                                                                         |                                                                                                                                                                                                                                                                                                                                                                                                                                                                                                                                                                                                                                                                                                                                                                                                                                                                                        |   |                        |                   |                       |                        |                |   |                        |                                |   |                        |                                  |   |                        |                             |   |                        |      |   |                        |        |   |                        |                    |   |                        |                   |
| 2  | No                                                                              |                                                                                                                                                                                                         |                                                                                                                                                                                                                                                                                                                                                                                                                                                                                                                                                                                                                                                                                                                                                                                                                                                                                        |   |                        |                   |                       |                        |                |   |                        |                                |   |                        |                                  |   |                        |                             |   |                        |      |   |                        |        |   |                        |                    |   |                        |                   |
| 3  | Unknown                                                                         |                                                                                                                                                                                                         |                                                                                                                                                                                                                                                                                                                                                                                                                                                                                                                                                                                                                                                                                                                                                                                                                                                                                        |   |                        |                   |                       |                        |                |   |                        |                                |   |                        |                                  |   |                        |                             |   |                        |      |   |                        |        |   |                        |                    |   |                        |                   |
| 50 | homeless                                                                        | Currently homeless                                                                                                                                                                                      | radio, Required<br><table border="1" data-bbox="1044 1373 1174 1491"> <tr> <td>1</td> <td>Yes</td> </tr> <tr> <td>2</td> <td>No</td> </tr> <tr> <td>3</td> <td>Unknown</td> </tr> </table>                                                                                                                                                                                                                                                                                                                                                                                                                                                                                                                                                                                                                                                                                             | 1 | Yes                    | 2                 | No                    | 3                      | Unknown        |   |                        |                                |   |                        |                                  |   |                        |                             |   |                        |      |   |                        |        |   |                        |                    |   |                        |                   |
| 1  | Yes                                                                             |                                                                                                                                                                                                         |                                                                                                                                                                                                                                                                                                                                                                                                                                                                                                                                                                                                                                                                                                                                                                                                                                                                                        |   |                        |                   |                       |                        |                |   |                        |                                |   |                        |                                  |   |                        |                             |   |                        |      |   |                        |        |   |                        |                    |   |                        |                   |
| 2  | No                                                                              |                                                                                                                                                                                                         |                                                                                                                                                                                                                                                                                                                                                                                                                                                                                                                                                                                                                                                                                                                                                                                                                                                                                        |   |                        |                   |                       |                        |                |   |                        |                                |   |                        |                                  |   |                        |                             |   |                        |      |   |                        |        |   |                        |                    |   |                        |                   |
| 3  | Unknown                                                                         |                                                                                                                                                                                                         |                                                                                                                                                                                                                                                                                                                                                                                                                                                                                                                                                                                                                                                                                                                                                                                                                                                                                        |   |                        |                   |                       |                        |                |   |                        |                                |   |                        |                                  |   |                        |                             |   |                        |      |   |                        |        |   |                        |                    |   |                        |                   |

|    |                                                                                                           |                                                                                                                                                                                                                                                                                                                                                                                                                                                                                                                                                                                       |                                                                                                                                                                                                                                                                                                                                                                                                                                                                                                                                                                                                                                                                                                                                                                                                                                                           |   |                        |                 |                             |                       |                                             |   |                         |                         |                 |                       |                   |   |                       |                      |   |                       |                           |   |                       |                        |   |                      |                        |   |                      |                   |
|----|-----------------------------------------------------------------------------------------------------------|---------------------------------------------------------------------------------------------------------------------------------------------------------------------------------------------------------------------------------------------------------------------------------------------------------------------------------------------------------------------------------------------------------------------------------------------------------------------------------------------------------------------------------------------------------------------------------------|-----------------------------------------------------------------------------------------------------------------------------------------------------------------------------------------------------------------------------------------------------------------------------------------------------------------------------------------------------------------------------------------------------------------------------------------------------------------------------------------------------------------------------------------------------------------------------------------------------------------------------------------------------------------------------------------------------------------------------------------------------------------------------------------------------------------------------------------------------------|---|------------------------|-----------------|-----------------------------|-----------------------|---------------------------------------------|---|-------------------------|-------------------------|-----------------|-----------------------|-------------------|---|-----------------------|----------------------|---|-----------------------|---------------------------|---|-----------------------|------------------------|---|----------------------|------------------------|---|----------------------|-------------------|
| 51 | comorbidity_other                                                                                         | Additional comorbidities prior to ICU admission*Chronic Kidney Disease (CKD) is defined as a baseline eGFR< 60 on at least two consecutive values at least 12 weeks apart prior to hospital admission. If not available, defined as per medical history**Chronic liver disease includes cirrhosis, alcohol-related liver disease, nonalcoholic fatty liver disease, autoimmune hepatitis, hepatitis B or hepatitis C, primary biliary cirrhosis, and others***Active malignancy is defined as any malignancy (other than non-melanoma skin cancer) that was treated in the prior year | checkbox, Required<br><table border="1" data-bbox="1044 111 1523 552"> <tr><td>1</td><td>comorbidity_other__1</td><td>CKD*</td></tr> <tr><td>2</td><td>comorbidity_other__2</td><td>ESRD on hemodialysis or peritoneal dialysis</td></tr> <tr><td>3</td><td>comorbidity_other__3</td><td>Chronic liver disease**</td></tr> <tr><td>4</td><td>comorbidity_other__4</td><td>HIV/AIDS</td></tr> <tr><td>5</td><td>comorbidity_other__5</td><td>Active malignancy***</td></tr> <tr><td>6</td><td>comorbidity_other__6</td><td>Solid organ transplant</td></tr> <tr><td>7</td><td>comorbidity_other__7</td><td>Bone marrow transplant</td></tr> <tr><td>8</td><td>comorbidity_other__8</td><td>Other immunodeficiency</td></tr> <tr><td>9</td><td>comorbidity_other__9</td><td>None of the above</td></tr> </table> <p>Field Annotation: @NONEOFTHEABOVE=9</p> | 1 | comorbidity_other__1   | CKD*            | 2                           | comorbidity_other__2  | ESRD on hemodialysis or peritoneal dialysis | 3 | comorbidity_other__3    | Chronic liver disease** | 4               | comorbidity_other__4  | HIV/AIDS          | 5 | comorbidity_other__5  | Active malignancy*** | 6 | comorbidity_other__6  | Solid organ transplant    | 7 | comorbidity_other__7  | Bone marrow transplant | 8 | comorbidity_other__8 | Other immunodeficiency | 9 | comorbidity_other__9 | None of the above |
| 1  | comorbidity_other__1                                                                                      | CKD*                                                                                                                                                                                                                                                                                                                                                                                                                                                                                                                                                                                  |                                                                                                                                                                                                                                                                                                                                                                                                                                                                                                                                                                                                                                                                                                                                                                                                                                                           |   |                        |                 |                             |                       |                                             |   |                         |                         |                 |                       |                   |   |                       |                      |   |                       |                           |   |                       |                        |   |                      |                        |   |                      |                   |
| 2  | comorbidity_other__2                                                                                      | ESRD on hemodialysis or peritoneal dialysis                                                                                                                                                                                                                                                                                                                                                                                                                                                                                                                                           |                                                                                                                                                                                                                                                                                                                                                                                                                                                                                                                                                                                                                                                                                                                                                                                                                                                           |   |                        |                 |                             |                       |                                             |   |                         |                         |                 |                       |                   |   |                       |                      |   |                       |                           |   |                       |                        |   |                      |                        |   |                      |                   |
| 3  | comorbidity_other__3                                                                                      | Chronic liver disease**                                                                                                                                                                                                                                                                                                                                                                                                                                                                                                                                                               |                                                                                                                                                                                                                                                                                                                                                                                                                                                                                                                                                                                                                                                                                                                                                                                                                                                           |   |                        |                 |                             |                       |                                             |   |                         |                         |                 |                       |                   |   |                       |                      |   |                       |                           |   |                       |                        |   |                      |                        |   |                      |                   |
| 4  | comorbidity_other__4                                                                                      | HIV/AIDS                                                                                                                                                                                                                                                                                                                                                                                                                                                                                                                                                                              |                                                                                                                                                                                                                                                                                                                                                                                                                                                                                                                                                                                                                                                                                                                                                                                                                                                           |   |                        |                 |                             |                       |                                             |   |                         |                         |                 |                       |                   |   |                       |                      |   |                       |                           |   |                       |                        |   |                      |                        |   |                      |                   |
| 5  | comorbidity_other__5                                                                                      | Active malignancy***                                                                                                                                                                                                                                                                                                                                                                                                                                                                                                                                                                  |                                                                                                                                                                                                                                                                                                                                                                                                                                                                                                                                                                                                                                                                                                                                                                                                                                                           |   |                        |                 |                             |                       |                                             |   |                         |                         |                 |                       |                   |   |                       |                      |   |                       |                           |   |                       |                        |   |                      |                        |   |                      |                   |
| 6  | comorbidity_other__6                                                                                      | Solid organ transplant                                                                                                                                                                                                                                                                                                                                                                                                                                                                                                                                                                |                                                                                                                                                                                                                                                                                                                                                                                                                                                                                                                                                                                                                                                                                                                                                                                                                                                           |   |                        |                 |                             |                       |                                             |   |                         |                         |                 |                       |                   |   |                       |                      |   |                       |                           |   |                       |                        |   |                      |                        |   |                      |                   |
| 7  | comorbidity_other__7                                                                                      | Bone marrow transplant                                                                                                                                                                                                                                                                                                                                                                                                                                                                                                                                                                |                                                                                                                                                                                                                                                                                                                                                                                                                                                                                                                                                                                                                                                                                                                                                                                                                                                           |   |                        |                 |                             |                       |                                             |   |                         |                         |                 |                       |                   |   |                       |                      |   |                       |                           |   |                       |                        |   |                      |                        |   |                      |                   |
| 8  | comorbidity_other__8                                                                                      | Other immunodeficiency                                                                                                                                                                                                                                                                                                                                                                                                                                                                                                                                                                |                                                                                                                                                                                                                                                                                                                                                                                                                                                                                                                                                                                                                                                                                                                                                                                                                                                           |   |                        |                 |                             |                       |                                             |   |                         |                         |                 |                       |                   |   |                       |                      |   |                       |                           |   |                       |                        |   |                      |                        |   |                      |                   |
| 9  | comorbidity_other__9                                                                                      | None of the above                                                                                                                                                                                                                                                                                                                                                                                                                                                                                                                                                                     |                                                                                                                                                                                                                                                                                                                                                                                                                                                                                                                                                                                                                                                                                                                                                                                                                                                           |   |                        |                 |                             |                       |                                             |   |                         |                         |                 |                       |                   |   |                       |                      |   |                       |                           |   |                       |                        |   |                      |                        |   |                      |                   |
| 52 | dialysis_modality_prior<br>Show the field ONLY if: [comorbidity_other(2)] = '1'                           | Dialysis modality prior to hospital admission                                                                                                                                                                                                                                                                                                                                                                                                                                                                                                                                         | radio, Required<br><table border="1" data-bbox="1044 644 1292 762"> <tr><td>1</td><td>In-center hemodialysis</td></tr> <tr><td>2</td><td>Home hemodialysis</td></tr> <tr><td>3</td><td>Peritoneal dialysis</td></tr> </table>                                                                                                                                                                                                                                                                                                                                                                                                                                                                                                                                                                                                                             | 1 | In-center hemodialysis | 2               | Home hemodialysis           | 3                     | Peritoneal dialysis                         |   |                         |                         |                 |                       |                   |   |                       |                      |   |                       |                           |   |                       |                        |   |                      |                        |   |                      |                   |
| 1  | In-center hemodialysis                                                                                    |                                                                                                                                                                                                                                                                                                                                                                                                                                                                                                                                                                                       |                                                                                                                                                                                                                                                                                                                                                                                                                                                                                                                                                                                                                                                                                                                                                                                                                                                           |   |                        |                 |                             |                       |                                             |   |                         |                         |                 |                       |                   |   |                       |                      |   |                       |                           |   |                       |                        |   |                      |                        |   |                      |                   |
| 2  | Home hemodialysis                                                                                         |                                                                                                                                                                                                                                                                                                                                                                                                                                                                                                                                                                                       |                                                                                                                                                                                                                                                                                                                                                                                                                                                                                                                                                                                                                                                                                                                                                                                                                                                           |   |                        |                 |                             |                       |                                             |   |                         |                         |                 |                       |                   |   |                       |                      |   |                       |                           |   |                       |                        |   |                      |                        |   |                      |                   |
| 3  | Peritoneal dialysis                                                                                       |                                                                                                                                                                                                                                                                                                                                                                                                                                                                                                                                                                                       |                                                                                                                                                                                                                                                                                                                                                                                                                                                                                                                                                                                                                                                                                                                                                                                                                                                           |   |                        |                 |                             |                       |                                             |   |                         |                         |                 |                       |                   |   |                       |                      |   |                       |                           |   |                       |                        |   |                      |                        |   |                      |                   |
| 53 | type_access<br>Show the field ONLY if: [dialysis_modality_prior] = '1' or [dialysis_modality_prior] = '2' | Type of vascular access used prior to hospital admission                                                                                                                                                                                                                                                                                                                                                                                                                                                                                                                              | radio, Required<br><table border="1" data-bbox="1044 806 1325 924"> <tr><td>1</td><td>Catheter</td></tr> <tr><td>2</td><td>Arteriovenous fistula (AVF)</td></tr> <tr><td>3</td><td>Arteriovenous graft (AVG)</td></tr> </table>                                                                                                                                                                                                                                                                                                                                                                                                                                                                                                                                                                                                                           | 1 | Catheter               | 2               | Arteriovenous fistula (AVF) | 3                     | Arteriovenous graft (AVG)                   |   |                         |                         |                 |                       |                   |   |                       |                      |   |                       |                           |   |                       |                        |   |                      |                        |   |                      |                   |
| 1  | Catheter                                                                                                  |                                                                                                                                                                                                                                                                                                                                                                                                                                                                                                                                                                                       |                                                                                                                                                                                                                                                                                                                                                                                                                                                                                                                                                                                                                                                                                                                                                                                                                                                           |   |                        |                 |                             |                       |                                             |   |                         |                         |                 |                       |                   |   |                       |                      |   |                       |                           |   |                       |                        |   |                      |                        |   |                      |                   |
| 2  | Arteriovenous fistula (AVF)                                                                               |                                                                                                                                                                                                                                                                                                                                                                                                                                                                                                                                                                                       |                                                                                                                                                                                                                                                                                                                                                                                                                                                                                                                                                                                                                                                                                                                                                                                                                                                           |   |                        |                 |                             |                       |                                             |   |                         |                         |                 |                       |                   |   |                       |                      |   |                       |                           |   |                       |                        |   |                      |                        |   |                      |                   |
| 3  | Arteriovenous graft (AVG)                                                                                 |                                                                                                                                                                                                                                                                                                                                                                                                                                                                                                                                                                                       |                                                                                                                                                                                                                                                                                                                                                                                                                                                                                                                                                                                                                                                                                                                                                                                                                                                           |   |                        |                 |                             |                       |                                             |   |                         |                         |                 |                       |                   |   |                       |                      |   |                       |                           |   |                       |                        |   |                      |                        |   |                      |                   |
| 54 | duration_dialysis<br>Show the field ONLY if: [comorbidity_other(2)] = '1'                                 | How long had the patient been receiving maintenance dialysis therapy prior to ICU admission?                                                                                                                                                                                                                                                                                                                                                                                                                                                                                          | radio, Required<br><table border="1" data-bbox="1044 968 1325 1205"> <tr><td>1</td><td>&lt; 6 months</td></tr> <tr><td>2</td><td>Between 6 and 12 months</td></tr> <tr><td>3</td><td>Between 1 and 2.9 years</td></tr> <tr><td>4</td><td>Between 3 and 4.9 years</td></tr> <tr><td>5</td><td>5 or more years</td></tr> <tr><td>6</td><td>Unknown</td></tr> </table>                                                                                                                                                                                                                                                                                                                                                                                                                                                                                       | 1 | < 6 months             | 2               | Between 6 and 12 months     | 3                     | Between 1 and 2.9 years                     | 4 | Between 3 and 4.9 years | 5                       | 5 or more years | 6                     | Unknown           |   |                       |                      |   |                       |                           |   |                       |                        |   |                      |                        |   |                      |                   |
| 1  | < 6 months                                                                                                |                                                                                                                                                                                                                                                                                                                                                                                                                                                                                                                                                                                       |                                                                                                                                                                                                                                                                                                                                                                                                                                                                                                                                                                                                                                                                                                                                                                                                                                                           |   |                        |                 |                             |                       |                                             |   |                         |                         |                 |                       |                   |   |                       |                      |   |                       |                           |   |                       |                        |   |                      |                        |   |                      |                   |
| 2  | Between 6 and 12 months                                                                                   |                                                                                                                                                                                                                                                                                                                                                                                                                                                                                                                                                                                       |                                                                                                                                                                                                                                                                                                                                                                                                                                                                                                                                                                                                                                                                                                                                                                                                                                                           |   |                        |                 |                             |                       |                                             |   |                         |                         |                 |                       |                   |   |                       |                      |   |                       |                           |   |                       |                        |   |                      |                        |   |                      |                   |
| 3  | Between 1 and 2.9 years                                                                                   |                                                                                                                                                                                                                                                                                                                                                                                                                                                                                                                                                                                       |                                                                                                                                                                                                                                                                                                                                                                                                                                                                                                                                                                                                                                                                                                                                                                                                                                                           |   |                        |                 |                             |                       |                                             |   |                         |                         |                 |                       |                   |   |                       |                      |   |                       |                           |   |                       |                        |   |                      |                        |   |                      |                   |
| 4  | Between 3 and 4.9 years                                                                                   |                                                                                                                                                                                                                                                                                                                                                                                                                                                                                                                                                                                       |                                                                                                                                                                                                                                                                                                                                                                                                                                                                                                                                                                                                                                                                                                                                                                                                                                                           |   |                        |                 |                             |                       |                                             |   |                         |                         |                 |                       |                   |   |                       |                      |   |                       |                           |   |                       |                        |   |                      |                        |   |                      |                   |
| 5  | 5 or more years                                                                                           |                                                                                                                                                                                                                                                                                                                                                                                                                                                                                                                                                                                       |                                                                                                                                                                                                                                                                                                                                                                                                                                                                                                                                                                                                                                                                                                                                                                                                                                                           |   |                        |                 |                             |                       |                                             |   |                         |                         |                 |                       |                   |   |                       |                      |   |                       |                           |   |                       |                        |   |                      |                        |   |                      |                   |
| 6  | Unknown                                                                                                   |                                                                                                                                                                                                                                                                                                                                                                                                                                                                                                                                                                                       |                                                                                                                                                                                                                                                                                                                                                                                                                                                                                                                                                                                                                                                                                                                                                                                                                                                           |   |                        |                 |                             |                       |                                             |   |                         |                         |                 |                       |                   |   |                       |                      |   |                       |                           |   |                       |                        |   |                      |                        |   |                      |                   |
| 55 | hx_failed_txplant<br>Show the field ONLY if: [comorbidity_other(2)] = '1'                                 | Does the patient have a history of a failed kidney transplant?                                                                                                                                                                                                                                                                                                                                                                                                                                                                                                                        | radio, Required<br><table border="1" data-bbox="1044 1247 1174 1365"> <tr><td>1</td><td>Yes</td></tr> <tr><td>2</td><td>No</td></tr> <tr><td>3</td><td>Unknown</td></tr> </table>                                                                                                                                                                                                                                                                                                                                                                                                                                                                                                                                                                                                                                                                         | 1 | Yes                    | 2               | No                          | 3                     | Unknown                                     |   |                         |                         |                 |                       |                   |   |                       |                      |   |                       |                           |   |                       |                        |   |                      |                        |   |                      |                   |
| 1  | Yes                                                                                                       |                                                                                                                                                                                                                                                                                                                                                                                                                                                                                                                                                                                       |                                                                                                                                                                                                                                                                                                                                                                                                                                                                                                                                                                                                                                                                                                                                                                                                                                                           |   |                        |                 |                             |                       |                                             |   |                         |                         |                 |                       |                   |   |                       |                      |   |                       |                           |   |                       |                        |   |                      |                        |   |                      |                   |
| 2  | No                                                                                                        |                                                                                                                                                                                                                                                                                                                                                                                                                                                                                                                                                                                       |                                                                                                                                                                                                                                                                                                                                                                                                                                                                                                                                                                                                                                                                                                                                                                                                                                                           |   |                        |                 |                             |                       |                                             |   |                         |                         |                 |                       |                   |   |                       |                      |   |                       |                           |   |                       |                        |   |                      |                        |   |                      |                   |
| 3  | Unknown                                                                                                   |                                                                                                                                                                                                                                                                                                                                                                                                                                                                                                                                                                                       |                                                                                                                                                                                                                                                                                                                                                                                                                                                                                                                                                                                                                                                                                                                                                                                                                                                           |   |                        |                 |                             |                       |                                             |   |                         |                         |                 |                       |                   |   |                       |                      |   |                       |                           |   |                       |                        |   |                      |                        |   |                      |                   |
| 56 | type_liver_disease<br>Show the field ONLY if: [comorbidity_other(3)] = '1'                                | Type of chronic liver disease                                                                                                                                                                                                                                                                                                                                                                                                                                                                                                                                                         | checkbox, Required<br><table border="1" data-bbox="1044 1409 1523 1717"> <tr><td>1</td><td>type_liver_disease__1</td><td>Alcohol-related</td></tr> <tr><td>2</td><td>type_liver_disease__2</td><td>Non-alcoholic fatty liver disease/NASH</td></tr> <tr><td>3</td><td>type_liver_disease__3</td><td>Hepatitis B virus</td></tr> <tr><td>4</td><td>type_liver_disease__4</td><td>Hepatitis C virus</td></tr> <tr><td>5</td><td>type_liver_disease__5</td><td>Autoimmune hepatitis</td></tr> <tr><td>6</td><td>type_liver_disease__6</td><td>Primary biliary cirrhosis</td></tr> <tr><td>7</td><td>type_liver_disease__7</td><td>Other</td></tr> </table>                                                                                                                                                                                                   | 1 | type_liver_disease__1  | Alcohol-related | 2                           | type_liver_disease__2 | Non-alcoholic fatty liver disease/NASH      | 3 | type_liver_disease__3   | Hepatitis B virus       | 4               | type_liver_disease__4 | Hepatitis C virus | 5 | type_liver_disease__5 | Autoimmune hepatitis | 6 | type_liver_disease__6 | Primary biliary cirrhosis | 7 | type_liver_disease__7 | Other                  |   |                      |                        |   |                      |                   |
| 1  | type_liver_disease__1                                                                                     | Alcohol-related                                                                                                                                                                                                                                                                                                                                                                                                                                                                                                                                                                       |                                                                                                                                                                                                                                                                                                                                                                                                                                                                                                                                                                                                                                                                                                                                                                                                                                                           |   |                        |                 |                             |                       |                                             |   |                         |                         |                 |                       |                   |   |                       |                      |   |                       |                           |   |                       |                        |   |                      |                        |   |                      |                   |
| 2  | type_liver_disease__2                                                                                     | Non-alcoholic fatty liver disease/NASH                                                                                                                                                                                                                                                                                                                                                                                                                                                                                                                                                |                                                                                                                                                                                                                                                                                                                                                                                                                                                                                                                                                                                                                                                                                                                                                                                                                                                           |   |                        |                 |                             |                       |                                             |   |                         |                         |                 |                       |                   |   |                       |                      |   |                       |                           |   |                       |                        |   |                      |                        |   |                      |                   |
| 3  | type_liver_disease__3                                                                                     | Hepatitis B virus                                                                                                                                                                                                                                                                                                                                                                                                                                                                                                                                                                     |                                                                                                                                                                                                                                                                                                                                                                                                                                                                                                                                                                                                                                                                                                                                                                                                                                                           |   |                        |                 |                             |                       |                                             |   |                         |                         |                 |                       |                   |   |                       |                      |   |                       |                           |   |                       |                        |   |                      |                        |   |                      |                   |
| 4  | type_liver_disease__4                                                                                     | Hepatitis C virus                                                                                                                                                                                                                                                                                                                                                                                                                                                                                                                                                                     |                                                                                                                                                                                                                                                                                                                                                                                                                                                                                                                                                                                                                                                                                                                                                                                                                                                           |   |                        |                 |                             |                       |                                             |   |                         |                         |                 |                       |                   |   |                       |                      |   |                       |                           |   |                       |                        |   |                      |                        |   |                      |                   |
| 5  | type_liver_disease__5                                                                                     | Autoimmune hepatitis                                                                                                                                                                                                                                                                                                                                                                                                                                                                                                                                                                  |                                                                                                                                                                                                                                                                                                                                                                                                                                                                                                                                                                                                                                                                                                                                                                                                                                                           |   |                        |                 |                             |                       |                                             |   |                         |                         |                 |                       |                   |   |                       |                      |   |                       |                           |   |                       |                        |   |                      |                        |   |                      |                   |
| 6  | type_liver_disease__6                                                                                     | Primary biliary cirrhosis                                                                                                                                                                                                                                                                                                                                                                                                                                                                                                                                                             |                                                                                                                                                                                                                                                                                                                                                                                                                                                                                                                                                                                                                                                                                                                                                                                                                                                           |   |                        |                 |                             |                       |                                             |   |                         |                         |                 |                       |                   |   |                       |                      |   |                       |                           |   |                       |                        |   |                      |                        |   |                      |                   |
| 7  | type_liver_disease__7                                                                                     | Other                                                                                                                                                                                                                                                                                                                                                                                                                                                                                                                                                                                 |                                                                                                                                                                                                                                                                                                                                                                                                                                                                                                                                                                                                                                                                                                                                                                                                                                                           |   |                        |                 |                             |                       |                                             |   |                         |                         |                 |                       |                   |   |                       |                      |   |                       |                           |   |                       |                        |   |                      |                        |   |                      |                   |
| 57 | other_liver<br>Show the field ONLY if: [type_liver_disease(7)] = '1'                                      | Enter other chronic liver disease                                                                                                                                                                                                                                                                                                                                                                                                                                                                                                                                                     | text, Required                                                                                                                                                                                                                                                                                                                                                                                                                                                                                                                                                                                                                                                                                                                                                                                                                                            |   |                        |                 |                             |                       |                                             |   |                         |                         |                 |                       |                   |   |                       |                      |   |                       |                           |   |                       |                        |   |                      |                        |   |                      |                   |

|    |                                                                                 |                                                                                                                                                                                                                                             |                                                                                                                                                                                                                                                                                                                                                                                                                                                                                                                                                                                                                                                                                                                                  |   |                       |             |    |                       |               |   |                       |                                             |   |                       |                 |   |                       |                         |   |                       |                   |   |                |          |   |                |                |   |                |              |    |                 |              |
|----|---------------------------------------------------------------------------------|---------------------------------------------------------------------------------------------------------------------------------------------------------------------------------------------------------------------------------------------|----------------------------------------------------------------------------------------------------------------------------------------------------------------------------------------------------------------------------------------------------------------------------------------------------------------------------------------------------------------------------------------------------------------------------------------------------------------------------------------------------------------------------------------------------------------------------------------------------------------------------------------------------------------------------------------------------------------------------------|---|-----------------------|-------------|----|-----------------------|---------------|---|-----------------------|---------------------------------------------|---|-----------------------|-----------------|---|-----------------------|-------------------------|---|-----------------------|-------------------|---|----------------|----------|---|----------------|----------------|---|----------------|--------------|----|-----------------|--------------|
| 58 | cancer_type<br>Show the field ONLY if:<br>[comorbidity_other(5)] = '1'          | Type of malignancy                                                                                                                                                                                                                          | checkbox, Required<br><table border="1"> <tr><td>1</td><td>cancer_type__1</td><td>Lung cancer</td></tr> <tr><td>2</td><td>cancer_type__2</td><td>Breast cancer</td></tr> <tr><td>3</td><td>cancer_type__3</td><td>Colorectal cancer</td></tr> <tr><td>4</td><td>cancer_type__4</td><td>Prostate cancer</td></tr> <tr><td>5</td><td>cancer_type__5</td><td>Gastric cancer</td></tr> <tr><td>6</td><td>cancer_type__6</td><td>Pancreatic cancer</td></tr> <tr><td>7</td><td>cancer_type__7</td><td>Melanoma</td></tr> <tr><td>8</td><td>cancer_type__8</td><td>Ovarian cancer</td></tr> <tr><td>9</td><td>cancer_type__9</td><td>Brain cancer</td></tr> <tr><td>10</td><td>cancer_type__10</td><td>Other cancer</td></tr> </table> | 1 | cancer_type__1        | Lung cancer | 2  | cancer_type__2        | Breast cancer | 3 | cancer_type__3        | Colorectal cancer                           | 4 | cancer_type__4        | Prostate cancer | 5 | cancer_type__5        | Gastric cancer          | 6 | cancer_type__6        | Pancreatic cancer | 7 | cancer_type__7 | Melanoma | 8 | cancer_type__8 | Ovarian cancer | 9 | cancer_type__9 | Brain cancer | 10 | cancer_type__10 | Other cancer |
| 1  | cancer_type__1                                                                  | Lung cancer                                                                                                                                                                                                                                 |                                                                                                                                                                                                                                                                                                                                                                                                                                                                                                                                                                                                                                                                                                                                  |   |                       |             |    |                       |               |   |                       |                                             |   |                       |                 |   |                       |                         |   |                       |                   |   |                |          |   |                |                |   |                |              |    |                 |              |
| 2  | cancer_type__2                                                                  | Breast cancer                                                                                                                                                                                                                               |                                                                                                                                                                                                                                                                                                                                                                                                                                                                                                                                                                                                                                                                                                                                  |   |                       |             |    |                       |               |   |                       |                                             |   |                       |                 |   |                       |                         |   |                       |                   |   |                |          |   |                |                |   |                |              |    |                 |              |
| 3  | cancer_type__3                                                                  | Colorectal cancer                                                                                                                                                                                                                           |                                                                                                                                                                                                                                                                                                                                                                                                                                                                                                                                                                                                                                                                                                                                  |   |                       |             |    |                       |               |   |                       |                                             |   |                       |                 |   |                       |                         |   |                       |                   |   |                |          |   |                |                |   |                |              |    |                 |              |
| 4  | cancer_type__4                                                                  | Prostate cancer                                                                                                                                                                                                                             |                                                                                                                                                                                                                                                                                                                                                                                                                                                                                                                                                                                                                                                                                                                                  |   |                       |             |    |                       |               |   |                       |                                             |   |                       |                 |   |                       |                         |   |                       |                   |   |                |          |   |                |                |   |                |              |    |                 |              |
| 5  | cancer_type__5                                                                  | Gastric cancer                                                                                                                                                                                                                              |                                                                                                                                                                                                                                                                                                                                                                                                                                                                                                                                                                                                                                                                                                                                  |   |                       |             |    |                       |               |   |                       |                                             |   |                       |                 |   |                       |                         |   |                       |                   |   |                |          |   |                |                |   |                |              |    |                 |              |
| 6  | cancer_type__6                                                                  | Pancreatic cancer                                                                                                                                                                                                                           |                                                                                                                                                                                                                                                                                                                                                                                                                                                                                                                                                                                                                                                                                                                                  |   |                       |             |    |                       |               |   |                       |                                             |   |                       |                 |   |                       |                         |   |                       |                   |   |                |          |   |                |                |   |                |              |    |                 |              |
| 7  | cancer_type__7                                                                  | Melanoma                                                                                                                                                                                                                                    |                                                                                                                                                                                                                                                                                                                                                                                                                                                                                                                                                                                                                                                                                                                                  |   |                       |             |    |                       |               |   |                       |                                             |   |                       |                 |   |                       |                         |   |                       |                   |   |                |          |   |                |                |   |                |              |    |                 |              |
| 8  | cancer_type__8                                                                  | Ovarian cancer                                                                                                                                                                                                                              |                                                                                                                                                                                                                                                                                                                                                                                                                                                                                                                                                                                                                                                                                                                                  |   |                       |             |    |                       |               |   |                       |                                             |   |                       |                 |   |                       |                         |   |                       |                   |   |                |          |   |                |                |   |                |              |    |                 |              |
| 9  | cancer_type__9                                                                  | Brain cancer                                                                                                                                                                                                                                |                                                                                                                                                                                                                                                                                                                                                                                                                                                                                                                                                                                                                                                                                                                                  |   |                       |             |    |                       |               |   |                       |                                             |   |                       |                 |   |                       |                         |   |                       |                   |   |                |          |   |                |                |   |                |              |    |                 |              |
| 10 | cancer_type__10                                                                 | Other cancer                                                                                                                                                                                                                                |                                                                                                                                                                                                                                                                                                                                                                                                                                                                                                                                                                                                                                                                                                                                  |   |                       |             |    |                       |               |   |                       |                                             |   |                       |                 |   |                       |                         |   |                       |                   |   |                |          |   |                |                |   |                |              |    |                 |              |
| 59 | other_cancer<br>Show the field ONLY if:<br>[cancer_type(10)] = '1'              | Enter the other malignancy                                                                                                                                                                                                                  | text, Required                                                                                                                                                                                                                                                                                                                                                                                                                                                                                                                                                                                                                                                                                                                   |   |                       |             |    |                       |               |   |                       |                                             |   |                       |                 |   |                       |                         |   |                       |                   |   |                |          |   |                |                |   |                |              |    |                 |              |
| 60 | solid_txplant_type<br>Show the field ONLY if:<br>[comorbidity_other(6)] = '1'   | Type of solid organ transplant                                                                                                                                                                                                              | checkbox, Required<br><table border="1"> <tr><td>1</td><td>solid_txplant_type__1</td><td>Kidney</td></tr> <tr><td>2</td><td>solid_txplant_type__2</td><td>Liver</td></tr> <tr><td>3</td><td>solid_txplant_type__3</td><td>Heart</td></tr> <tr><td>4</td><td>solid_txplant_type__4</td><td>Lung</td></tr> <tr><td>5</td><td>solid_txplant_type__5</td><td>Other</td></tr> </table>                                                                                                                                                                                                                                                                                                                                                | 1 | solid_txplant_type__1 | Kidney      | 2  | solid_txplant_type__2 | Liver         | 3 | solid_txplant_type__3 | Heart                                       | 4 | solid_txplant_type__4 | Lung            | 5 | solid_txplant_type__5 | Other                   |   |                       |                   |   |                |          |   |                |                |   |                |              |    |                 |              |
| 1  | solid_txplant_type__1                                                           | Kidney                                                                                                                                                                                                                                      |                                                                                                                                                                                                                                                                                                                                                                                                                                                                                                                                                                                                                                                                                                                                  |   |                       |             |    |                       |               |   |                       |                                             |   |                       |                 |   |                       |                         |   |                       |                   |   |                |          |   |                |                |   |                |              |    |                 |              |
| 2  | solid_txplant_type__2                                                           | Liver                                                                                                                                                                                                                                       |                                                                                                                                                                                                                                                                                                                                                                                                                                                                                                                                                                                                                                                                                                                                  |   |                       |             |    |                       |               |   |                       |                                             |   |                       |                 |   |                       |                         |   |                       |                   |   |                |          |   |                |                |   |                |              |    |                 |              |
| 3  | solid_txplant_type__3                                                           | Heart                                                                                                                                                                                                                                       |                                                                                                                                                                                                                                                                                                                                                                                                                                                                                                                                                                                                                                                                                                                                  |   |                       |             |    |                       |               |   |                       |                                             |   |                       |                 |   |                       |                         |   |                       |                   |   |                |          |   |                |                |   |                |              |    |                 |              |
| 4  | solid_txplant_type__4                                                           | Lung                                                                                                                                                                                                                                        |                                                                                                                                                                                                                                                                                                                                                                                                                                                                                                                                                                                                                                                                                                                                  |   |                       |             |    |                       |               |   |                       |                                             |   |                       |                 |   |                       |                         |   |                       |                   |   |                |          |   |                |                |   |                |              |    |                 |              |
| 5  | solid_txplant_type__5                                                           | Other                                                                                                                                                                                                                                       |                                                                                                                                                                                                                                                                                                                                                                                                                                                                                                                                                                                                                                                                                                                                  |   |                       |             |    |                       |               |   |                       |                                             |   |                       |                 |   |                       |                         |   |                       |                   |   |                |          |   |                |                |   |                |              |    |                 |              |
| 61 | other_solid_txplant<br>Show the field ONLY if:<br>[solid_txplant_type(5)] = '1' | Enter the other solid organ transplant type                                                                                                                                                                                                 | text, Required                                                                                                                                                                                                                                                                                                                                                                                                                                                                                                                                                                                                                                                                                                                   |   |                       |             |    |                       |               |   |                       |                                             |   |                       |                 |   |                       |                         |   |                       |                   |   |                |          |   |                |                |   |                |              |    |                 |              |
| 62 | other_immunodef<br>Show the field ONLY if:<br>[comorbidity_other(8)] = '1'      | Enter the other immunodeficiency                                                                                                                                                                                                            | text, Required                                                                                                                                                                                                                                                                                                                                                                                                                                                                                                                                                                                                                                                                                                                   |   |                       |             |    |                       |               |   |                       |                                             |   |                       |                 |   |                       |                         |   |                       |                   |   |                |          |   |                |                |   |                |              |    |                 |              |
| 63 | bl_cr_avail                                                                     | At least one baseline serum creatinine value available?<br>Defined as a value between 365 to 7 days PRIOR to hospitalization                                                                                                                | yesno, Required<br><table border="1"> <tr><td>1</td><td>Yes</td></tr> <tr><td>0</td><td>No</td></tr> </table>                                                                                                                                                                                                                                                                                                                                                                                                                                                                                                                                                                                                                    | 1 | Yes                   | 0           | No |                       |               |   |                       |                                             |   |                       |                 |   |                       |                         |   |                       |                   |   |                |          |   |                |                |   |                |              |    |                 |              |
| 1  | Yes                                                                             |                                                                                                                                                                                                                                             |                                                                                                                                                                                                                                                                                                                                                                                                                                                                                                                                                                                                                                                                                                                                  |   |                       |             |    |                       |               |   |                       |                                             |   |                       |                 |   |                       |                         |   |                       |                   |   |                |          |   |                |                |   |                |              |    |                 |              |
| 0  | No                                                                              |                                                                                                                                                                                                                                             |                                                                                                                                                                                                                                                                                                                                                                                                                                                                                                                                                                                                                                                                                                                                  |   |                       |             |    |                       |               |   |                       |                                             |   |                       |                 |   |                       |                         |   |                       |                   |   |                |          |   |                |                |   |                |              |    |                 |              |
| 64 | baseline_cr<br>Show the field ONLY if:<br>[bl_cr_avail] = '1'                   | Baseline serum creatinine (mg/dl) Defined as the LOWEST value within 365 to 7 days prior to hospital admission                                                                                                                              | text (number, Min: 0.1, Max: 11), Required                                                                                                                                                                                                                                                                                                                                                                                                                                                                                                                                                                                                                                                                                       |   |                       |             |    |                       |               |   |                       |                                             |   |                       |                 |   |                       |                         |   |                       |                   |   |                |          |   |                |                |   |                |              |    |                 |              |
| 65 | cr_hosp_adm                                                                     | Serum creatinine (mg/dl) on HOSPITAL admission                                                                                                                                                                                              | text, Required                                                                                                                                                                                                                                                                                                                                                                                                                                                                                                                                                                                                                                                                                                                   |   |                       |             |    |                       |               |   |                       |                                             |   |                       |                 |   |                       |                         |   |                       |                   |   |                |          |   |                |                |   |                |              |    |                 |              |
| 66 | home_meds_anti_htn                                                              | Anti-hypertensive meds prior to hospital admission (select all that apply) ACE-Is include lisinopril, fosinopril, captopril, and others ARBs include losartan, valsartan, irbesartan, and others MRAs include spironolactone and eplerenone | checkbox, Required<br><table border="1"> <tr><td>1</td><td>home_meds_anti_htn__1</td><td>ACE-I</td></tr> <tr><td>2</td><td>home_meds_anti_htn__2</td><td>ARB</td></tr> <tr><td>3</td><td>home_meds_anti_htn__3</td><td>Mineralocorticoid receptor antagonist (MRA)</td></tr> <tr><td>4</td><td>home_meds_anti_htn__4</td><td>Beta-blocker</td></tr> <tr><td>5</td><td>home_meds_anti_htn__5</td><td>Other anti-hypertensive</td></tr> <tr><td>6</td><td>home_meds_anti_htn__6</td><td>None of the above</td></tr> </table><br>Field Annotation: @NONEOFTHEABOVE=6                                                                                                                                                                | 1 | home_meds_anti_htn__1 | ACE-I       | 2  | home_meds_anti_htn__2 | ARB           | 3 | home_meds_anti_htn__3 | Mineralocorticoid receptor antagonist (MRA) | 4 | home_meds_anti_htn__4 | Beta-blocker    | 5 | home_meds_anti_htn__5 | Other anti-hypertensive | 6 | home_meds_anti_htn__6 | None of the above |   |                |          |   |                |                |   |                |              |    |                 |              |
| 1  | home_meds_anti_htn__1                                                           | ACE-I                                                                                                                                                                                                                                       |                                                                                                                                                                                                                                                                                                                                                                                                                                                                                                                                                                                                                                                                                                                                  |   |                       |             |    |                       |               |   |                       |                                             |   |                       |                 |   |                       |                         |   |                       |                   |   |                |          |   |                |                |   |                |              |    |                 |              |
| 2  | home_meds_anti_htn__2                                                           | ARB                                                                                                                                                                                                                                         |                                                                                                                                                                                                                                                                                                                                                                                                                                                                                                                                                                                                                                                                                                                                  |   |                       |             |    |                       |               |   |                       |                                             |   |                       |                 |   |                       |                         |   |                       |                   |   |                |          |   |                |                |   |                |              |    |                 |              |
| 3  | home_meds_anti_htn__3                                                           | Mineralocorticoid receptor antagonist (MRA)                                                                                                                                                                                                 |                                                                                                                                                                                                                                                                                                                                                                                                                                                                                                                                                                                                                                                                                                                                  |   |                       |             |    |                       |               |   |                       |                                             |   |                       |                 |   |                       |                         |   |                       |                   |   |                |          |   |                |                |   |                |              |    |                 |              |
| 4  | home_meds_anti_htn__4                                                           | Beta-blocker                                                                                                                                                                                                                                |                                                                                                                                                                                                                                                                                                                                                                                                                                                                                                                                                                                                                                                                                                                                  |   |                       |             |    |                       |               |   |                       |                                             |   |                       |                 |   |                       |                         |   |                       |                   |   |                |          |   |                |                |   |                |              |    |                 |              |
| 5  | home_meds_anti_htn__5                                                           | Other anti-hypertensive                                                                                                                                                                                                                     |                                                                                                                                                                                                                                                                                                                                                                                                                                                                                                                                                                                                                                                                                                                                  |   |                       |             |    |                       |               |   |                       |                                             |   |                       |                 |   |                       |                         |   |                       |                   |   |                |          |   |                |                |   |                |              |    |                 |              |
| 6  | home_meds_anti_htn__6                                                           | None of the above                                                                                                                                                                                                                           |                                                                                                                                                                                                                                                                                                                                                                                                                                                                                                                                                                                                                                                                                                                                  |   |                       |             |    |                       |               |   |                       |                                             |   |                       |                 |   |                       |                         |   |                       |                   |   |                |          |   |                |                |   |                |              |    |                 |              |
| 67 | other_anti_htn<br>Show the field ONLY if:<br>[home_meds_anti_htn(5)] = '1'      | Enter the other anti-hypertensive(s) If entering more than one, separate with commas                                                                                                                                                        | text, Required                                                                                                                                                                                                                                                                                                                                                                                                                                                                                                                                                                                                                                                                                                                   |   |                       |             |    |                       |               |   |                       |                                             |   |                       |                 |   |                       |                         |   |                       |                   |   |                |          |   |                |                |   |                |              |    |                 |              |

|    |                                                                      |                                                                                                                                                                                                                                                                                                                                                                                                                                                       |                                                                                                                                                                                                                                                                                                                                                                                                                                                                                                                                                                                                                                                                                                                                                                                                           |   |                       |                     |            |                       |                                                      |   |                       |                               |   |                       |                                   |   |                       |                       |   |                       |                   |   |                    |                                       |   |                    |                   |   |                    |                   |
|----|----------------------------------------------------------------------|-------------------------------------------------------------------------------------------------------------------------------------------------------------------------------------------------------------------------------------------------------------------------------------------------------------------------------------------------------------------------------------------------------------------------------------------------------|-----------------------------------------------------------------------------------------------------------------------------------------------------------------------------------------------------------------------------------------------------------------------------------------------------------------------------------------------------------------------------------------------------------------------------------------------------------------------------------------------------------------------------------------------------------------------------------------------------------------------------------------------------------------------------------------------------------------------------------------------------------------------------------------------------------|---|-----------------------|---------------------|------------|-----------------------|------------------------------------------------------|---|-----------------------|-------------------------------|---|-----------------------|-----------------------------------|---|-----------------------|-----------------------|---|-----------------------|-------------------|---|--------------------|---------------------------------------|---|--------------------|-------------------|---|--------------------|-------------------|
| 68 | home_meds_other                                                      | Other meds prior to hospital admission (select all that apply).Note: only refers to home meds (don't include meds started at an outside hospital)Statins include atorvastatin, pravastatin, rosuvastatin, and others NSAIDs include ibuprofen (Advil, Motrin), naproxen (Aleve), and others For vitamins C and D, do not include if the only source was a multivitamin*Include these meds if any were taken within 1 week prior to hospital admission | checkbox, Required<br><table border="1" data-bbox="1042 111 1503 474"> <tr><td>1</td><td>home_meds_other__1</td><td>Statin</td></tr> <tr><td>2</td><td>home_meds_other__2</td><td>NSAID</td></tr> <tr><td>3</td><td>home_meds_other__3</td><td>Aspirin</td></tr> <tr><td>4</td><td>home_meds_other__4</td><td>Vitamin C</td></tr> <tr><td>5</td><td>home_meds_other__5</td><td>Vitamin D</td></tr> <tr><td>6</td><td>home_meds_other__6</td><td>Chloroquine*</td></tr> <tr><td>7</td><td>home_meds_other__7</td><td>Hydroxychloroquine*</td></tr> <tr><td>8</td><td>home_meds_other__8</td><td>Azithromycin*</td></tr> <tr><td>9</td><td>home_meds_other__9</td><td>None of the above</td></tr> </table> <p>Field Annotation: @NONEOFTHEABOVE=9</p>                                                       | 1 | home_meds_other__1    | Statin              | 2          | home_meds_other__2    | NSAID                                                | 3 | home_meds_other__3    | Aspirin                       | 4 | home_meds_other__4    | Vitamin C                         | 5 | home_meds_other__5    | Vitamin D             | 6 | home_meds_other__6    | Chloroquine*      | 7 | home_meds_other__7 | Hydroxychloroquine*                   | 8 | home_meds_other__8 | Azithromycin*     | 9 | home_meds_other__9 | None of the above |
| 1  | home_meds_other__1                                                   | Statin                                                                                                                                                                                                                                                                                                                                                                                                                                                |                                                                                                                                                                                                                                                                                                                                                                                                                                                                                                                                                                                                                                                                                                                                                                                                           |   |                       |                     |            |                       |                                                      |   |                       |                               |   |                       |                                   |   |                       |                       |   |                       |                   |   |                    |                                       |   |                    |                   |   |                    |                   |
| 2  | home_meds_other__2                                                   | NSAID                                                                                                                                                                                                                                                                                                                                                                                                                                                 |                                                                                                                                                                                                                                                                                                                                                                                                                                                                                                                                                                                                                                                                                                                                                                                                           |   |                       |                     |            |                       |                                                      |   |                       |                               |   |                       |                                   |   |                       |                       |   |                       |                   |   |                    |                                       |   |                    |                   |   |                    |                   |
| 3  | home_meds_other__3                                                   | Aspirin                                                                                                                                                                                                                                                                                                                                                                                                                                               |                                                                                                                                                                                                                                                                                                                                                                                                                                                                                                                                                                                                                                                                                                                                                                                                           |   |                       |                     |            |                       |                                                      |   |                       |                               |   |                       |                                   |   |                       |                       |   |                       |                   |   |                    |                                       |   |                    |                   |   |                    |                   |
| 4  | home_meds_other__4                                                   | Vitamin C                                                                                                                                                                                                                                                                                                                                                                                                                                             |                                                                                                                                                                                                                                                                                                                                                                                                                                                                                                                                                                                                                                                                                                                                                                                                           |   |                       |                     |            |                       |                                                      |   |                       |                               |   |                       |                                   |   |                       |                       |   |                       |                   |   |                    |                                       |   |                    |                   |   |                    |                   |
| 5  | home_meds_other__5                                                   | Vitamin D                                                                                                                                                                                                                                                                                                                                                                                                                                             |                                                                                                                                                                                                                                                                                                                                                                                                                                                                                                                                                                                                                                                                                                                                                                                                           |   |                       |                     |            |                       |                                                      |   |                       |                               |   |                       |                                   |   |                       |                       |   |                       |                   |   |                    |                                       |   |                    |                   |   |                    |                   |
| 6  | home_meds_other__6                                                   | Chloroquine*                                                                                                                                                                                                                                                                                                                                                                                                                                          |                                                                                                                                                                                                                                                                                                                                                                                                                                                                                                                                                                                                                                                                                                                                                                                                           |   |                       |                     |            |                       |                                                      |   |                       |                               |   |                       |                                   |   |                       |                       |   |                       |                   |   |                    |                                       |   |                    |                   |   |                    |                   |
| 7  | home_meds_other__7                                                   | Hydroxychloroquine*                                                                                                                                                                                                                                                                                                                                                                                                                                   |                                                                                                                                                                                                                                                                                                                                                                                                                                                                                                                                                                                                                                                                                                                                                                                                           |   |                       |                     |            |                       |                                                      |   |                       |                               |   |                       |                                   |   |                       |                       |   |                       |                   |   |                    |                                       |   |                    |                   |   |                    |                   |
| 8  | home_meds_other__8                                                   | Azithromycin*                                                                                                                                                                                                                                                                                                                                                                                                                                         |                                                                                                                                                                                                                                                                                                                                                                                                                                                                                                                                                                                                                                                                                                                                                                                                           |   |                       |                     |            |                       |                                                      |   |                       |                               |   |                       |                                   |   |                       |                       |   |                       |                   |   |                    |                                       |   |                    |                   |   |                    |                   |
| 9  | home_meds_other__9                                                   | None of the above                                                                                                                                                                                                                                                                                                                                                                                                                                     |                                                                                                                                                                                                                                                                                                                                                                                                                                                                                                                                                                                                                                                                                                                                                                                                           |   |                       |                     |            |                       |                                                      |   |                       |                               |   |                       |                                   |   |                       |                       |   |                       |                   |   |                    |                                       |   |                    |                   |   |                    |                   |
| 69 | home_meds_anticoag                                                   | Therapeutic anticoagulants prior to admissionDo not include anti-platelet agents such as aspirin or clopidogrel (Plavix) as "other anticoagulant"                                                                                                                                                                                                                                                                                                     | checkbox, Required<br><table border="1" data-bbox="1042 569 1523 888"> <tr><td>1</td><td>home_meds_anticoag__1</td><td>Warfarin (Coumadin)</td></tr> <tr><td>2</td><td>home_meds_anticoag__2</td><td>Lovenox (Enoxaparin)</td></tr> <tr><td>3</td><td>home_meds_anticoag__3</td><td>Apixaban (Eliquis)</td></tr> <tr><td>4</td><td>home_meds_anticoag__4</td><td>Rivaroxaban (Xarelto)</td></tr> <tr><td>5</td><td>home_meds_anticoag__5</td><td>Other anticoagulant</td></tr> <tr><td>6</td><td>home_meds_anticoag__6</td><td>None of the above</td></tr> </table> <p>Field Annotation: @NONEOFTHEABOVE=6</p>                                                                                                                                                                                            | 1 | home_meds_anticoag__1 | Warfarin (Coumadin) | 2          | home_meds_anticoag__2 | Lovenox (Enoxaparin)                                 | 3 | home_meds_anticoag__3 | Apixaban (Eliquis)            | 4 | home_meds_anticoag__4 | Rivaroxaban (Xarelto)             | 5 | home_meds_anticoag__5 | Other anticoagulant   | 6 | home_meds_anticoag__6 | None of the above |   |                    |                                       |   |                    |                   |   |                    |                   |
| 1  | home_meds_anticoag__1                                                | Warfarin (Coumadin)                                                                                                                                                                                                                                                                                                                                                                                                                                   |                                                                                                                                                                                                                                                                                                                                                                                                                                                                                                                                                                                                                                                                                                                                                                                                           |   |                       |                     |            |                       |                                                      |   |                       |                               |   |                       |                                   |   |                       |                       |   |                       |                   |   |                    |                                       |   |                    |                   |   |                    |                   |
| 2  | home_meds_anticoag__2                                                | Lovenox (Enoxaparin)                                                                                                                                                                                                                                                                                                                                                                                                                                  |                                                                                                                                                                                                                                                                                                                                                                                                                                                                                                                                                                                                                                                                                                                                                                                                           |   |                       |                     |            |                       |                                                      |   |                       |                               |   |                       |                                   |   |                       |                       |   |                       |                   |   |                    |                                       |   |                    |                   |   |                    |                   |
| 3  | home_meds_anticoag__3                                                | Apixaban (Eliquis)                                                                                                                                                                                                                                                                                                                                                                                                                                    |                                                                                                                                                                                                                                                                                                                                                                                                                                                                                                                                                                                                                                                                                                                                                                                                           |   |                       |                     |            |                       |                                                      |   |                       |                               |   |                       |                                   |   |                       |                       |   |                       |                   |   |                    |                                       |   |                    |                   |   |                    |                   |
| 4  | home_meds_anticoag__4                                                | Rivaroxaban (Xarelto)                                                                                                                                                                                                                                                                                                                                                                                                                                 |                                                                                                                                                                                                                                                                                                                                                                                                                                                                                                                                                                                                                                                                                                                                                                                                           |   |                       |                     |            |                       |                                                      |   |                       |                               |   |                       |                                   |   |                       |                       |   |                       |                   |   |                    |                                       |   |                    |                   |   |                    |                   |
| 5  | home_meds_anticoag__5                                                | Other anticoagulant                                                                                                                                                                                                                                                                                                                                                                                                                                   |                                                                                                                                                                                                                                                                                                                                                                                                                                                                                                                                                                                                                                                                                                                                                                                                           |   |                       |                     |            |                       |                                                      |   |                       |                               |   |                       |                                   |   |                       |                       |   |                       |                   |   |                    |                                       |   |                    |                   |   |                    |                   |
| 6  | home_meds_anticoag__6                                                | None of the above                                                                                                                                                                                                                                                                                                                                                                                                                                     |                                                                                                                                                                                                                                                                                                                                                                                                                                                                                                                                                                                                                                                                                                                                                                                                           |   |                       |                     |            |                       |                                                      |   |                       |                               |   |                       |                                   |   |                       |                       |   |                       |                   |   |                    |                                       |   |                    |                   |   |                    |                   |
| 70 | immunosupp_med                                                       | Select if the patient received any of the following immunosuppressive medications in the 30 days prior to ICU admission *Do not include immunotherapy, such as immune checkpoint inhibitors (e.g., nivolumab)**CNIs include tacrolimus and cyclosporine; do not include CNIs applied topically (i.e., as an ointment)                                                                                                                                 | checkbox, Required<br><table border="1" data-bbox="1042 982 1523 1463"> <tr><td>1</td><td>immunosupp_med__1</td><td>Chemotherapy*</td></tr> <tr><td>2</td><td>immunosupp_med__2</td><td>Corticosteroids &gt;10mg prednisone/day (or equivalent)</td></tr> <tr><td>3</td><td>immunosupp_med__3</td><td>Calcineurin inhibitor (CNI)**</td></tr> <tr><td>4</td><td>immunosupp_med__4</td><td>Mycophenolate mofetile (Cellcept)</td></tr> <tr><td>5</td><td>immunosupp_med__5</td><td>Azathioprine (Imuran)</td></tr> <tr><td>6</td><td>immunosupp_med__6</td><td>Rituximab</td></tr> <tr><td>7</td><td>immunosupp_med__7</td><td>Other major immunosuppressive therapy</td></tr> <tr><td>8</td><td>immunosupp_med__8</td><td>None of the above</td></tr> </table> <p>Field Annotation: @NONEOFTHEABOVE=8</p> | 1 | immunosupp_med__1     | Chemotherapy*       | 2          | immunosupp_med__2     | Corticosteroids >10mg prednisone/day (or equivalent) | 3 | immunosupp_med__3     | Calcineurin inhibitor (CNI)** | 4 | immunosupp_med__4     | Mycophenolate mofetile (Cellcept) | 5 | immunosupp_med__5     | Azathioprine (Imuran) | 6 | immunosupp_med__6     | Rituximab         | 7 | immunosupp_med__7  | Other major immunosuppressive therapy | 8 | immunosupp_med__8  | None of the above |   |                    |                   |
| 1  | immunosupp_med__1                                                    | Chemotherapy*                                                                                                                                                                                                                                                                                                                                                                                                                                         |                                                                                                                                                                                                                                                                                                                                                                                                                                                                                                                                                                                                                                                                                                                                                                                                           |   |                       |                     |            |                       |                                                      |   |                       |                               |   |                       |                                   |   |                       |                       |   |                       |                   |   |                    |                                       |   |                    |                   |   |                    |                   |
| 2  | immunosupp_med__2                                                    | Corticosteroids >10mg prednisone/day (or equivalent)                                                                                                                                                                                                                                                                                                                                                                                                  |                                                                                                                                                                                                                                                                                                                                                                                                                                                                                                                                                                                                                                                                                                                                                                                                           |   |                       |                     |            |                       |                                                      |   |                       |                               |   |                       |                                   |   |                       |                       |   |                       |                   |   |                    |                                       |   |                    |                   |   |                    |                   |
| 3  | immunosupp_med__3                                                    | Calcineurin inhibitor (CNI)**                                                                                                                                                                                                                                                                                                                                                                                                                         |                                                                                                                                                                                                                                                                                                                                                                                                                                                                                                                                                                                                                                                                                                                                                                                                           |   |                       |                     |            |                       |                                                      |   |                       |                               |   |                       |                                   |   |                       |                       |   |                       |                   |   |                    |                                       |   |                    |                   |   |                    |                   |
| 4  | immunosupp_med__4                                                    | Mycophenolate mofetile (Cellcept)                                                                                                                                                                                                                                                                                                                                                                                                                     |                                                                                                                                                                                                                                                                                                                                                                                                                                                                                                                                                                                                                                                                                                                                                                                                           |   |                       |                     |            |                       |                                                      |   |                       |                               |   |                       |                                   |   |                       |                       |   |                       |                   |   |                    |                                       |   |                    |                   |   |                    |                   |
| 5  | immunosupp_med__5                                                    | Azathioprine (Imuran)                                                                                                                                                                                                                                                                                                                                                                                                                                 |                                                                                                                                                                                                                                                                                                                                                                                                                                                                                                                                                                                                                                                                                                                                                                                                           |   |                       |                     |            |                       |                                                      |   |                       |                               |   |                       |                                   |   |                       |                       |   |                       |                   |   |                    |                                       |   |                    |                   |   |                    |                   |
| 6  | immunosupp_med__6                                                    | Rituximab                                                                                                                                                                                                                                                                                                                                                                                                                                             |                                                                                                                                                                                                                                                                                                                                                                                                                                                                                                                                                                                                                                                                                                                                                                                                           |   |                       |                     |            |                       |                                                      |   |                       |                               |   |                       |                                   |   |                       |                       |   |                       |                   |   |                    |                                       |   |                    |                   |   |                    |                   |
| 7  | immunosupp_med__7                                                    | Other major immunosuppressive therapy                                                                                                                                                                                                                                                                                                                                                                                                                 |                                                                                                                                                                                                                                                                                                                                                                                                                                                                                                                                                                                                                                                                                                                                                                                                           |   |                       |                     |            |                       |                                                      |   |                       |                               |   |                       |                                   |   |                       |                       |   |                       |                   |   |                    |                                       |   |                    |                   |   |                    |                   |
| 8  | immunosupp_med__8                                                    | None of the above                                                                                                                                                                                                                                                                                                                                                                                                                                     |                                                                                                                                                                                                                                                                                                                                                                                                                                                                                                                                                                                                                                                                                                                                                                                                           |   |                       |                     |            |                       |                                                      |   |                       |                               |   |                       |                                   |   |                       |                       |   |                       |                   |   |                    |                                       |   |                    |                   |   |                    |                   |
| 71 | other_immunemed<br>Show the field ONLY if: [immunosupp_med(7)] = '1' | Enter the other major immunosuppressive medication(s) the patient was taking                                                                                                                                                                                                                                                                                                                                                                          | text, Required                                                                                                                                                                                                                                                                                                                                                                                                                                                                                                                                                                                                                                                                                                                                                                                            |   |                       |                     |            |                       |                                                      |   |                       |                               |   |                       |                                   |   |                       |                       |   |                       |                   |   |                    |                                       |   |                    |                   |   |                    |                   |
| 72 | notes_demo                                                           | Additional Notes (if any)Please do not use this space to enter additional medications or comorbidities                                                                                                                                                                                                                                                                                                                                                | notes                                                                                                                                                                                                                                                                                                                                                                                                                                                                                                                                                                                                                                                                                                                                                                                                     |   |                       |                     |            |                       |                                                      |   |                       |                               |   |                       |                                   |   |                       |                       |   |                       |                   |   |                    |                                       |   |                    |                   |   |                    |                   |
| 73 | demographics_symptoms_co_morbidities_home_medicatio_complete         | Section Header: <i>Form Status</i><br>Complete?                                                                                                                                                                                                                                                                                                                                                                                                       | dropdown<br><table border="1" data-bbox="1042 1732 1187 1850"> <tr><td>0</td><td>Incomplete</td></tr> <tr><td>1</td><td>Unverified</td></tr> <tr><td>2</td><td>Complete</td></tr> </table>                                                                                                                                                                                                                                                                                                                                                                                                                                                                                                                                                                                                                | 0 | Incomplete            | 1                   | Unverified | 2                     | Complete                                             |   |                       |                               |   |                       |                                   |   |                       |                       |   |                       |                   |   |                    |                                       |   |                    |                   |   |                    |                   |
| 0  | Incomplete                                                           |                                                                                                                                                                                                                                                                                                                                                                                                                                                       |                                                                                                                                                                                                                                                                                                                                                                                                                                                                                                                                                                                                                                                                                                                                                                                                           |   |                       |                     |            |                       |                                                      |   |                       |                               |   |                       |                                   |   |                       |                       |   |                       |                   |   |                    |                                       |   |                    |                   |   |                    |                   |
| 1  | Unverified                                                           |                                                                                                                                                                                                                                                                                                                                                                                                                                                       |                                                                                                                                                                                                                                                                                                                                                                                                                                                                                                                                                                                                                                                                                                                                                                                                           |   |                       |                     |            |                       |                                                      |   |                       |                               |   |                       |                                   |   |                       |                       |   |                       |                   |   |                    |                                       |   |                    |                   |   |                    |                   |
| 2  | Complete                                                             |                                                                                                                                                                                                                                                                                                                                                                                                                                                       |                                                                                                                                                                                                                                                                                                                                                                                                                                                                                                                                                                                                                                                                                                                                                                                                           |   |                       |                     |            |                       |                                                      |   |                       |                               |   |                       |                                   |   |                       |                       |   |                       |                   |   |                    |                                       |   |                    |                   |   |                    |                   |

Instrument: **Vital Signs And Severity-of-Illness On ICU Day 1** (vital\_signs\_and\_severityofillness\_on\_icu\_day\_1)

[^ Collapse](#)



|    |                                                          |                                                                                                                                                                                                                                                                                                                                                                                                                                   |                                                                                                                                                                                                                                                                                                                               |   |                                 |   |               |   |                                                |   |                   |   |                                                          |
|----|----------------------------------------------------------|-----------------------------------------------------------------------------------------------------------------------------------------------------------------------------------------------------------------------------------------------------------------------------------------------------------------------------------------------------------------------------------------------------------------------------------|-------------------------------------------------------------------------------------------------------------------------------------------------------------------------------------------------------------------------------------------------------------------------------------------------------------------------------|---|---------------------------------|---|---------------|---|------------------------------------------------|---|-------------------|---|----------------------------------------------------------|
| 74 | vs_instructions                                          | Unless otherwise specified, the timing of the data below refers to ICU Day1, defined as the 24h period from midnight PRIOR to ICU admission to midnight AFTER ICU admission. For example, if a patient is admitted to an ICU at 10pm, 22 of the 24 hours for ICU Day1 would actually be from prior to ICU arrival (e.g., from the ED or hospital ward). See timeline in the "REDCap instructions" PDF for additional details.     | descriptive                                                                                                                                                                                                                                                                                                                   |   |                                 |   |               |   |                                                |   |                   |   |                                                          |
| 75 | weight                                                   | Weight on ICU Day1 (or closest value prior)-Can enter in either kg or lbs-If none available, enter, "N/A"                                                                                                                                                                                                                                                                                                                         | text, Required                                                                                                                                                                                                                                                                                                                |   |                                 |   |               |   |                                                |   |                   |   |                                                          |
| 76 | weight_unit                                              | Units for weightBe sure to select the correct unit                                                                                                                                                                                                                                                                                                                                                                                | radio<br><table border="1"> <tr> <td>1</td> <td>Kilograms</td> </tr> <tr> <td>2</td> <td>Pounds</td> </tr> </table>                                                                                                                                                                                                           | 1 | Kilograms                       | 2 | Pounds        |   |                                                |   |                   |   |                                                          |
| 1  | Kilograms                                                |                                                                                                                                                                                                                                                                                                                                                                                                                                   |                                                                                                                                                                                                                                                                                                                               |   |                                 |   |               |   |                                                |   |                   |   |                                                          |
| 2  | Pounds                                                   |                                                                                                                                                                                                                                                                                                                                                                                                                                   |                                                                                                                                                                                                                                                                                                                               |   |                                 |   |               |   |                                                |   |                   |   |                                                          |
| 77 | height                                                   | Height-Can enter in either cm or inches-If not available, enter, "N/A"                                                                                                                                                                                                                                                                                                                                                            | text, Required                                                                                                                                                                                                                                                                                                                |   |                                 |   |               |   |                                                |   |                   |   |                                                          |
| 78 | height_unit                                              | Units for heightBe sure to select the correct unit                                                                                                                                                                                                                                                                                                                                                                                | radio<br><table border="1"> <tr> <td>1</td> <td>Centimeters</td> </tr> <tr> <td>2</td> <td>Inches</td> </tr> </table>                                                                                                                                                                                                         | 1 | Centimeters                     | 2 | Inches        |   |                                                |   |                   |   |                                                          |
| 1  | Centimeters                                              |                                                                                                                                                                                                                                                                                                                                                                                                                                   |                                                                                                                                                                                                                                                                                                                               |   |                                 |   |               |   |                                                |   |                   |   |                                                          |
| 2  | Inches                                                   |                                                                                                                                                                                                                                                                                                                                                                                                                                   |                                                                                                                                                                                                                                                                                                                               |   |                                 |   |               |   |                                                |   |                   |   |                                                          |
| 79 | admit_date                                               | Date of hospital admissionIf hospitalized elsewhere and then transferred to your hospital, enter the date of the initial hospitalization (e.g., if initially at "Hospital A" and then transferred to "Hospital B", enter the date admitted to Hospital A)                                                                                                                                                                         | text (date_mdy), Required                                                                                                                                                                                                                                                                                                     |   |                                 |   |               |   |                                                |   |                   |   |                                                          |
| 80 | icu_date                                                 | Date of ICU admission-If admitted to an outside/satellite/affiliate ICU and then transferred to an ICU at your hospital, enter the date admitted to the ICU at your hospital-If the patient had multiple ICU admissions at your hospital during their overall admission for COVID-19, enter the date of the initial ICU admission at your hospital                                                                                | text (date_mdy), Required                                                                                                                                                                                                                                                                                                     |   |                                 |   |               |   |                                                |   |                   |   |                                                          |
| 81 | covid_icu                                                | Admitted to a COVID-specific ICU?Defined as an ICU where all patients have suspected or confirmed COVID-19                                                                                                                                                                                                                                                                                                                        | yesno, Required<br><table border="1"> <tr> <td>1</td> <td>Yes</td> </tr> <tr> <td>0</td> <td>No</td> </tr> </table>                                                                                                                                                                                                           | 1 | Yes                             | 0 | No            |   |                                                |   |                   |   |                                                          |
| 1  | Yes                                                      |                                                                                                                                                                                                                                                                                                                                                                                                                                   |                                                                                                                                                                                                                                                                                                                               |   |                                 |   |               |   |                                                |   |                   |   |                                                          |
| 0  | No                                                       |                                                                                                                                                                                                                                                                                                                                                                                                                                   |                                                                                                                                                                                                                                                                                                                               |   |                                 |   |               |   |                                                |   |                   |   |                                                          |
| 82 | icu_type<br>Show the field ONLY if:<br>[covid_icu] = '0' | Type of ICUA non-ICU bed qualifies as a having been "converted" to an ICU bed for surge capacity if any of the following are present: a) being treated by an ICU team b) receiving invasive mechanical ventilation or ECMO c) receiving continuous renal replacement therapy (e.g., CVVH)d) receiving vasopressors/inotropes or mechanical cardiac support (e.g., LVAD) in a room where this would traditionally not be permitted | radio, Required<br><table border="1"> <tr> <td>1</td> <td>Medical ICU</td> </tr> <tr> <td>2</td> <td>Cardiac ICU</td> </tr> <tr> <td>3</td> <td>Surgical/Trauma/Burn ICU</td> </tr> <tr> <td>4</td> <td>Neuro ICU</td> </tr> <tr> <td>5</td> <td>Non-ICU bed converted into an ICU bed for surge capacity</td> </tr> </table> | 1 | Medical ICU                     | 2 | Cardiac ICU   | 3 | Surgical/Trauma/Burn ICU                       | 4 | Neuro ICU         | 5 | Non-ICU bed converted into an ICU bed for surge capacity |
| 1  | Medical ICU                                              |                                                                                                                                                                                                                                                                                                                                                                                                                                   |                                                                                                                                                                                                                                                                                                                               |   |                                 |   |               |   |                                                |   |                   |   |                                                          |
| 2  | Cardiac ICU                                              |                                                                                                                                                                                                                                                                                                                                                                                                                                   |                                                                                                                                                                                                                                                                                                                               |   |                                 |   |               |   |                                                |   |                   |   |                                                          |
| 3  | Surgical/Trauma/Burn ICU                                 |                                                                                                                                                                                                                                                                                                                                                                                                                                   |                                                                                                                                                                                                                                                                                                                               |   |                                 |   |               |   |                                                |   |                   |   |                                                          |
| 4  | Neuro ICU                                                |                                                                                                                                                                                                                                                                                                                                                                                                                                   |                                                                                                                                                                                                                                                                                                                               |   |                                 |   |               |   |                                                |   |                   |   |                                                          |
| 5  | Non-ICU bed converted into an ICU bed for surge capacity |                                                                                                                                                                                                                                                                                                                                                                                                                                   |                                                                                                                                                                                                                                                                                                                               |   |                                 |   |               |   |                                                |   |                   |   |                                                          |
| 83 | highest_temp                                             | Highest temperature on ICU Day1Can enter in either F or C                                                                                                                                                                                                                                                                                                                                                                         | text (number, Min: 1, Max: 110), Required                                                                                                                                                                                                                                                                                     |   |                                 |   |               |   |                                                |   |                   |   |                                                          |
| 84 | units_temp                                               | Units for temperature                                                                                                                                                                                                                                                                                                                                                                                                             | radio, Required<br><table border="1"> <tr> <td>1</td> <td>Fahrenheit</td> </tr> <tr> <td>2</td> <td>Celsius</td> </tr> </table>                                                                                                                                                                                               | 1 | Fahrenheit                      | 2 | Celsius       |   |                                                |   |                   |   |                                                          |
| 1  | Fahrenheit                                               |                                                                                                                                                                                                                                                                                                                                                                                                                                   |                                                                                                                                                                                                                                                                                                                               |   |                                 |   |               |   |                                                |   |                   |   |                                                          |
| 2  | Celsius                                                  |                                                                                                                                                                                                                                                                                                                                                                                                                                   |                                                                                                                                                                                                                                                                                                                               |   |                                 |   |               |   |                                                |   |                   |   |                                                          |
| 85 | lowest_sbp                                               | Lowest systolic blood pressure on ICU Day1Irrespective of whether on pressors or not                                                                                                                                                                                                                                                                                                                                              | text (number, Min: 0, Max: 200), Required                                                                                                                                                                                                                                                                                     |   |                                 |   |               |   |                                                |   |                   |   |                                                          |
| 86 | highest_hr                                               | Highest heart rate on ICU Day1                                                                                                                                                                                                                                                                                                                                                                                                    | text (number, Min: 20, Max: 200), Required                                                                                                                                                                                                                                                                                    |   |                                 |   |               |   |                                                |   |                   |   |                                                          |
| 87 | highest_resp                                             | Highest respiratory rate on ICU Day1Irrespective of whether on ventilator not                                                                                                                                                                                                                                                                                                                                                     | text (number, Min: 12, Max: 90), Required                                                                                                                                                                                                                                                                                     |   |                                 |   |               |   |                                                |   |                   |   |                                                          |
| 88 | vent_type                                                | What type of mechanical ventilation/oxygen delivery did the patient require on ICU Day1?-Invasive mechanical ventilation refers to mechanical ventilation delivered via endotracheal or tracheal tube-If more than one, select the highest level of support-If nasal cannula or regular facemask only, select "none of the above"                                                                                                 | radio, Required<br><table border="1"> <tr> <td>1</td> <td>Invasive mechanical ventilation</td> </tr> <tr> <td>2</td> <td>BiPaP or CPAP</td> </tr> <tr> <td>3</td> <td>High-flow nasal cannula or non-rebreather mask</td> </tr> <tr> <td>4</td> <td>None of the above</td> </tr> </table>                                     | 1 | Invasive mechanical ventilation | 2 | BiPaP or CPAP | 3 | High-flow nasal cannula or non-rebreather mask | 4 | None of the above |   |                                                          |
| 1  | Invasive mechanical ventilation                          |                                                                                                                                                                                                                                                                                                                                                                                                                                   |                                                                                                                                                                                                                                                                                                                               |   |                                 |   |               |   |                                                |   |                   |   |                                                          |
| 2  | BiPaP or CPAP                                            |                                                                                                                                                                                                                                                                                                                                                                                                                                   |                                                                                                                                                                                                                                                                                                                               |   |                                 |   |               |   |                                                |   |                   |   |                                                          |
| 3  | High-flow nasal cannula or non-rebreather mask           |                                                                                                                                                                                                                                                                                                                                                                                                                                   |                                                                                                                                                                                                                                                                                                                               |   |                                 |   |               |   |                                                |   |                   |   |                                                          |
| 4  | None of the above                                        |                                                                                                                                                                                                                                                                                                                                                                                                                                   |                                                                                                                                                                                                                                                                                                                               |   |                                 |   |               |   |                                                |   |                   |   |                                                          |

|    |                                                                         |                                                                                                                                                                                                                                                                                                                                                                                                                                                                                                               |                                                                                                                                                                                                                                                                                                                                                                                                                                                                                                                                                                                                                                                                                                                       |   |                   |                      |            |                   |                               |   |                   |           |   |                   |                |   |                   |            |   |                   |                               |   |                   |       |   |                   |                   |
|----|-------------------------------------------------------------------------|---------------------------------------------------------------------------------------------------------------------------------------------------------------------------------------------------------------------------------------------------------------------------------------------------------------------------------------------------------------------------------------------------------------------------------------------------------------------------------------------------------------|-----------------------------------------------------------------------------------------------------------------------------------------------------------------------------------------------------------------------------------------------------------------------------------------------------------------------------------------------------------------------------------------------------------------------------------------------------------------------------------------------------------------------------------------------------------------------------------------------------------------------------------------------------------------------------------------------------------------------|---|-------------------|----------------------|------------|-------------------|-------------------------------|---|-------------------|-----------|---|-------------------|----------------|---|-------------------|------------|---|-------------------|-------------------------------|---|-------------------|-------|---|-------------------|-------------------|
| 89 | infection_type                                                          | Did the patient have any confirmed or suspected infection(s) on ICU Day1 other than COVID-19? *Only select bacterial pneumonia if the patient had positive cultures (e.g., sputum or blood), a positive urine antigen for pneumococcus or legionella, or a new infiltrate on chest imaging (CXR or CT) suspected to be separate from COVID-related pneumonia**Examples of viral respiratory infections include influenza, parainfluenza, and RSV***Only if confirmed by blood cultures and/or cardiac imaging | checkbox, Required<br><table border="1"> <tr> <td>1</td> <td>infection_type__1</td> <td>Bacterial Pneumonia*</td> </tr> <tr> <td>2</td> <td>infection_type__2</td> <td>Viral respiratory infection**</td> </tr> <tr> <td>3</td> <td>infection_type__3</td> <td>Urosepsis</td> </tr> <tr> <td>4</td> <td>infection_type__4</td> <td>Biliary sepsis</td> </tr> <tr> <td>5</td> <td>infection_type__5</td> <td>Cellulitis</td> </tr> <tr> <td>6</td> <td>infection_type__6</td> <td>Bacteremia or endocarditis***</td> </tr> <tr> <td>7</td> <td>infection_type__7</td> <td>Other</td> </tr> <tr> <td>8</td> <td>infection_type__8</td> <td>None of the above</td> </tr> </table><br>Field Annotation: @NONEOFTHEABOVE=8 | 1 | infection_type__1 | Bacterial Pneumonia* | 2          | infection_type__2 | Viral respiratory infection** | 3 | infection_type__3 | Urosepsis | 4 | infection_type__4 | Biliary sepsis | 5 | infection_type__5 | Cellulitis | 6 | infection_type__6 | Bacteremia or endocarditis*** | 7 | infection_type__7 | Other | 8 | infection_type__8 | None of the above |
| 1  | infection_type__1                                                       | Bacterial Pneumonia*                                                                                                                                                                                                                                                                                                                                                                                                                                                                                          |                                                                                                                                                                                                                                                                                                                                                                                                                                                                                                                                                                                                                                                                                                                       |   |                   |                      |            |                   |                               |   |                   |           |   |                   |                |   |                   |            |   |                   |                               |   |                   |       |   |                   |                   |
| 2  | infection_type__2                                                       | Viral respiratory infection**                                                                                                                                                                                                                                                                                                                                                                                                                                                                                 |                                                                                                                                                                                                                                                                                                                                                                                                                                                                                                                                                                                                                                                                                                                       |   |                   |                      |            |                   |                               |   |                   |           |   |                   |                |   |                   |            |   |                   |                               |   |                   |       |   |                   |                   |
| 3  | infection_type__3                                                       | Urosepsis                                                                                                                                                                                                                                                                                                                                                                                                                                                                                                     |                                                                                                                                                                                                                                                                                                                                                                                                                                                                                                                                                                                                                                                                                                                       |   |                   |                      |            |                   |                               |   |                   |           |   |                   |                |   |                   |            |   |                   |                               |   |                   |       |   |                   |                   |
| 4  | infection_type__4                                                       | Biliary sepsis                                                                                                                                                                                                                                                                                                                                                                                                                                                                                                |                                                                                                                                                                                                                                                                                                                                                                                                                                                                                                                                                                                                                                                                                                                       |   |                   |                      |            |                   |                               |   |                   |           |   |                   |                |   |                   |            |   |                   |                               |   |                   |       |   |                   |                   |
| 5  | infection_type__5                                                       | Cellulitis                                                                                                                                                                                                                                                                                                                                                                                                                                                                                                    |                                                                                                                                                                                                                                                                                                                                                                                                                                                                                                                                                                                                                                                                                                                       |   |                   |                      |            |                   |                               |   |                   |           |   |                   |                |   |                   |            |   |                   |                               |   |                   |       |   |                   |                   |
| 6  | infection_type__6                                                       | Bacteremia or endocarditis***                                                                                                                                                                                                                                                                                                                                                                                                                                                                                 |                                                                                                                                                                                                                                                                                                                                                                                                                                                                                                                                                                                                                                                                                                                       |   |                   |                      |            |                   |                               |   |                   |           |   |                   |                |   |                   |            |   |                   |                               |   |                   |       |   |                   |                   |
| 7  | infection_type__7                                                       | Other                                                                                                                                                                                                                                                                                                                                                                                                                                                                                                         |                                                                                                                                                                                                                                                                                                                                                                                                                                                                                                                                                                                                                                                                                                                       |   |                   |                      |            |                   |                               |   |                   |           |   |                   |                |   |                   |            |   |                   |                               |   |                   |       |   |                   |                   |
| 8  | infection_type__8                                                       | None of the above                                                                                                                                                                                                                                                                                                                                                                                                                                                                                             |                                                                                                                                                                                                                                                                                                                                                                                                                                                                                                                                                                                                                                                                                                                       |   |                   |                      |            |                   |                               |   |                   |           |   |                   |                |   |                   |            |   |                   |                               |   |                   |       |   |                   |                   |
| 90 | viral_resp_infect<br>Show the field ONLY if: [infection_type(2)] = '1'  | Enter the viral respiratory infection                                                                                                                                                                                                                                                                                                                                                                                                                                                                         | text, Required                                                                                                                                                                                                                                                                                                                                                                                                                                                                                                                                                                                                                                                                                                        |   |                   |                      |            |                   |                               |   |                   |           |   |                   |                |   |                   |            |   |                   |                               |   |                   |       |   |                   |                   |
| 91 | other_infection_d1<br>Show the field ONLY if: [infection_type(7)] = '1' | Enter the other infection                                                                                                                                                                                                                                                                                                                                                                                                                                                                                     | text, Required                                                                                                                                                                                                                                                                                                                                                                                                                                                                                                                                                                                                                                                                                                        |   |                   |                      |            |                   |                               |   |                   |           |   |                   |                |   |                   |            |   |                   |                               |   |                   |       |   |                   |                   |
| 92 | antibiotic                                                              | Enter the number of antibiotics the patient was treated with on ICU Day1-Do not include antivirals, antifungals, or antimalarials (e.g., chloroquine or hydroxychloroquine).- Commonly used antibiotics include vancomycin, piperacillin-tazobactim (Zosyn), azithromycin, cephalosporins, quinolones, etc.                                                                                                                                                                                                   | radio, Required<br><table border="1"> <tr> <td>0</td> <td>0</td> </tr> <tr> <td>1</td> <td>1</td> </tr> <tr> <td>2</td> <td>2</td> </tr> <tr> <td>3</td> <td>3</td> </tr> <tr> <td>4</td> <td>4</td> </tr> <tr> <td>5</td> <td>5 or more</td> </tr> </table>                                                                                                                                                                                                                                                                                                                                                                                                                                                          | 0 | 0                 | 1                    | 1          | 2                 | 2                             | 3 | 3                 | 4         | 4 | 5                 | 5 or more      |   |                   |            |   |                   |                               |   |                   |       |   |                   |                   |
| 0  | 0                                                                       |                                                                                                                                                                                                                                                                                                                                                                                                                                                                                                               |                                                                                                                                                                                                                                                                                                                                                                                                                                                                                                                                                                                                                                                                                                                       |   |                   |                      |            |                   |                               |   |                   |           |   |                   |                |   |                   |            |   |                   |                               |   |                   |       |   |                   |                   |
| 1  | 1                                                                       |                                                                                                                                                                                                                                                                                                                                                                                                                                                                                                               |                                                                                                                                                                                                                                                                                                                                                                                                                                                                                                                                                                                                                                                                                                                       |   |                   |                      |            |                   |                               |   |                   |           |   |                   |                |   |                   |            |   |                   |                               |   |                   |       |   |                   |                   |
| 2  | 2                                                                       |                                                                                                                                                                                                                                                                                                                                                                                                                                                                                                               |                                                                                                                                                                                                                                                                                                                                                                                                                                                                                                                                                                                                                                                                                                                       |   |                   |                      |            |                   |                               |   |                   |           |   |                   |                |   |                   |            |   |                   |                               |   |                   |       |   |                   |                   |
| 3  | 3                                                                       |                                                                                                                                                                                                                                                                                                                                                                                                                                                                                                               |                                                                                                                                                                                                                                                                                                                                                                                                                                                                                                                                                                                                                                                                                                                       |   |                   |                      |            |                   |                               |   |                   |           |   |                   |                |   |                   |            |   |                   |                               |   |                   |       |   |                   |                   |
| 4  | 4                                                                       |                                                                                                                                                                                                                                                                                                                                                                                                                                                                                                               |                                                                                                                                                                                                                                                                                                                                                                                                                                                                                                                                                                                                                                                                                                                       |   |                   |                      |            |                   |                               |   |                   |           |   |                   |                |   |                   |            |   |                   |                               |   |                   |       |   |                   |                   |
| 5  | 5 or more                                                               |                                                                                                                                                                                                                                                                                                                                                                                                                                                                                                               |                                                                                                                                                                                                                                                                                                                                                                                                                                                                                                                                                                                                                                                                                                                       |   |                   |                      |            |                   |                               |   |                   |           |   |                   |                |   |                   |            |   |                   |                               |   |                   |       |   |                   |                   |
| 93 | tamiflu                                                                 | Was the patient treated with oseltamivir (Tamiflu) on ICU Day1?Includes patients who were started on Tamiflu PRIOR to ICU Day1, as long as they continued to receive it on ICU Day1                                                                                                                                                                                                                                                                                                                           | yesno, Required<br><table border="1"> <tr> <td>1</td> <td>Yes</td> </tr> <tr> <td>0</td> <td>No</td> </tr> </table>                                                                                                                                                                                                                                                                                                                                                                                                                                                                                                                                                                                                   | 1 | Yes               | 0                    | No         |                   |                               |   |                   |           |   |                   |                |   |                   |            |   |                   |                               |   |                   |       |   |                   |                   |
| 1  | Yes                                                                     |                                                                                                                                                                                                                                                                                                                                                                                                                                                                                                               |                                                                                                                                                                                                                                                                                                                                                                                                                                                                                                                                                                                                                                                                                                                       |   |                   |                      |            |                   |                               |   |                   |           |   |                   |                |   |                   |            |   |                   |                               |   |                   |       |   |                   |                   |
| 0  | No                                                                      |                                                                                                                                                                                                                                                                                                                                                                                                                                                                                                               |                                                                                                                                                                                                                                                                                                                                                                                                                                                                                                                                                                                                                                                                                                                       |   |                   |                      |            |                   |                               |   |                   |           |   |                   |                |   |                   |            |   |                   |                               |   |                   |       |   |                   |                   |
| 94 | procalcitonin                                                           | Enter procalcitonin level (ng/ml) if checked within 24h before or 24h after admission to the ICU-If more than one available, enter the value closest to ICU admission-If none available, enter "N/A"-If < assay, enter 0-If > assay, enter the upper limit of the assay and do not include the ">" symbol                                                                                                                                                                                                     | text, Required                                                                                                                                                                                                                                                                                                                                                                                                                                                                                                                                                                                                                                                                                                        |   |                   |                      |            |                   |                               |   |                   |           |   |                   |                |   |                   |            |   |                   |                               |   |                   |       |   |                   |                   |
| 95 | cpk_day1                                                                | Enter CPK level (U/L) if checked within 24h before or 24h after admission to the ICU-If more than one available, enter the value closest to ICU admission-If none available, enter "N/A"-If < assay, enter 0-If > assay, enter the upper limit of the assay                                                                                                                                                                                                                                                   | text, Required                                                                                                                                                                                                                                                                                                                                                                                                                                                                                                                                                                                                                                                                                                        |   |                   |                      |            |                   |                               |   |                   |           |   |                   |                |   |                   |            |   |                   |                               |   |                   |       |   |                   |                   |
| 96 | sodium_day1                                                             | Enter sodium level (mEq/L) if checked within 24h before or 24h after admission to the ICU-If more than one available, enter the value closest to ICU admission-If none available, enter "N/A"                                                                                                                                                                                                                                                                                                                 | text, Required                                                                                                                                                                                                                                                                                                                                                                                                                                                                                                                                                                                                                                                                                                        |   |                   |                      |            |                   |                               |   |                   |           |   |                   |                |   |                   |            |   |                   |                               |   |                   |       |   |                   |                   |
| 97 | ams                                                                     | Altered mental status on ICU Day1?For patients who are intubated/sedated, use the most recent exam prior to intubation/sedation                                                                                                                                                                                                                                                                                                                                                                               | radio, Required<br><table border="1"> <tr> <td>1</td> <td>Yes</td> </tr> <tr> <td>2</td> <td>No</td> </tr> <tr> <td>3</td> <td>Data not available</td> </tr> </table>                                                                                                                                                                                                                                                                                                                                                                                                                                                                                                                                                 | 1 | Yes               | 2                    | No         | 3                 | Data not available            |   |                   |           |   |                   |                |   |                   |            |   |                   |                               |   |                   |       |   |                   |                   |
| 1  | Yes                                                                     |                                                                                                                                                                                                                                                                                                                                                                                                                                                                                                               |                                                                                                                                                                                                                                                                                                                                                                                                                                                                                                                                                                                                                                                                                                                       |   |                   |                      |            |                   |                               |   |                   |           |   |                   |                |   |                   |            |   |                   |                               |   |                   |       |   |                   |                   |
| 2  | No                                                                      |                                                                                                                                                                                                                                                                                                                                                                                                                                                                                                               |                                                                                                                                                                                                                                                                                                                                                                                                                                                                                                                                                                                                                                                                                                                       |   |                   |                      |            |                   |                               |   |                   |           |   |                   |                |   |                   |            |   |                   |                               |   |                   |       |   |                   |                   |
| 3  | Data not available                                                      |                                                                                                                                                                                                                                                                                                                                                                                                                                                                                                               |                                                                                                                                                                                                                                                                                                                                                                                                                                                                                                                                                                                                                                                                                                                       |   |                   |                      |            |                   |                               |   |                   |           |   |                   |                |   |                   |            |   |                   |                               |   |                   |       |   |                   |                   |
| 98 | notes_day1                                                              | Additional notes (if any)                                                                                                                                                                                                                                                                                                                                                                                                                                                                                     | notes                                                                                                                                                                                                                                                                                                                                                                                                                                                                                                                                                                                                                                                                                                                 |   |                   |                      |            |                   |                               |   |                   |           |   |                   |                |   |                   |            |   |                   |                               |   |                   |       |   |                   |                   |
| 99 | vital_signs_and_severityofillness_on_icu_day_1_complete                 | Section Header: <i>Form Status</i><br>Complete?                                                                                                                                                                                                                                                                                                                                                                                                                                                               | dropdown<br><table border="1"> <tr> <td>0</td> <td>Incomplete</td> </tr> <tr> <td>1</td> <td>Unverified</td> </tr> <tr> <td>2</td> <td>Complete</td> </tr> </table>                                                                                                                                                                                                                                                                                                                                                                                                                                                                                                                                                   | 0 | Incomplete        | 1                    | Unverified | 2                 | Complete                      |   |                   |           |   |                   |                |   |                   |            |   |                   |                               |   |                   |       |   |                   |                   |
| 0  | Incomplete                                                              |                                                                                                                                                                                                                                                                                                                                                                                                                                                                                                               |                                                                                                                                                                                                                                                                                                                                                                                                                                                                                                                                                                                                                                                                                                                       |   |                   |                      |            |                   |                               |   |                   |           |   |                   |                |   |                   |            |   |                   |                               |   |                   |       |   |                   |                   |
| 1  | Unverified                                                              |                                                                                                                                                                                                                                                                                                                                                                                                                                                                                                               |                                                                                                                                                                                                                                                                                                                                                                                                                                                                                                                                                                                                                                                                                                                       |   |                   |                      |            |                   |                               |   |                   |           |   |                   |                |   |                   |            |   |                   |                               |   |                   |       |   |                   |                   |
| 2  | Complete                                                                |                                                                                                                                                                                                                                                                                                                                                                                                                                                                                                               |                                                                                                                                                                                                                                                                                                                                                                                                                                                                                                                                                                                                                                                                                                                       |   |                   |                      |            |                   |                               |   |                   |           |   |                   |                |   |                   |            |   |                   |                               |   |                   |       |   |                   |                   |

| Instrument: <b>Longitudinal Data On Labs And Physiologic Parameters in the First 14 Days following ICU Admission</b> (longitudinal_data_on_labs_and_physiologic_paramete) |                          |                                                                                                                                                                                                                                                                                                                                                                                                                                                                                                                                                                                                                                                                                                                                                                                                                                                                                                                                                                                                                                                                                                                                                                                                                                                                                                                                                                                                                                                                                                                                                                                                                                                                        |                                                                                                                                                                                                                                                                                                                                                                                                                                       |   |              |          |   |              |      |   |              |      |   |              |      |   |              |      |   |              |      |   |              |      |
|---------------------------------------------------------------------------------------------------------------------------------------------------------------------------|--------------------------|------------------------------------------------------------------------------------------------------------------------------------------------------------------------------------------------------------------------------------------------------------------------------------------------------------------------------------------------------------------------------------------------------------------------------------------------------------------------------------------------------------------------------------------------------------------------------------------------------------------------------------------------------------------------------------------------------------------------------------------------------------------------------------------------------------------------------------------------------------------------------------------------------------------------------------------------------------------------------------------------------------------------------------------------------------------------------------------------------------------------------------------------------------------------------------------------------------------------------------------------------------------------------------------------------------------------------------------------------------------------------------------------------------------------------------------------------------------------------------------------------------------------------------------------------------------------------------------------------------------------------------------------------------------------|---------------------------------------------------------------------------------------------------------------------------------------------------------------------------------------------------------------------------------------------------------------------------------------------------------------------------------------------------------------------------------------------------------------------------------------|---|--------------|----------|---|--------------|------|---|--------------|------|---|--------------|------|---|--------------|------|---|--------------|------|---|--------------|------|
| 100                                                                                                                                                                       | instruct                 | The questions below refer to the first 14 days following ICU admission. Even if the patient was in the ICU for less than 14 days and was transferred to the hospital floor, continue to enter data for the full 14 days or until discharged from the hospital or death (whichever occurs first). We highly recommend waiting to fill out this instrument (and future instruments) until the first of death, hospital discharge, at least 14 days of survival data is available. Each ICU Day is a discrete 24h period, from midnight to midnight. ICU Day1 refers to the 24h period from the midnight PRIOR to ICU admission to the midnight AFTER ICU admission. For example, if a patient was admitted to an ICU at 10pm, 22 of the 24 hours for ICU Day1 would actually be from prior to arrival in the ICU. See timeline in the "REDCap instructions" PDF for additional details. If more than one lab value is available on any given day, use the first one. If there is no value available that day, leave the field blank (i.e., do NOT write, "N/A" here)-If a lab is below assay (e.g., Troponin< 6), enter 0-If a lab is above assay (e.g., IL-6>3,000), enter the upper limit of the assay (e.g., "3,000")-Do not include any units or "%" in these fields; only enter numbers-If both an arterial and venous lactate are available on the same day, enter the arterial value, otherwise enter the venous value Please pay close attention to the units, particularly for CRP, D-dimer, and troponin, and convert to the units we are using if needed. For example, if your lab reports troponin in ng/ml, multiply the values by 1,000 to convert to ng/L | descriptive                                                                                                                                                                                                                                                                                                                                                                                                                           |   |              |          |   |              |      |   |              |      |   |              |      |   |              |      |   |              |      |   |              |      |
| 101                                                                                                                                                                       | labs                     | Labs                                                                                                                                                                                                                                                                                                                                                                                                                                                                                                                                                                                                                                                                                                                                                                                                                                                                                                                                                                                                                                                                                                                                                                                                                                                                                                                                                                                                                                                                                                                                                                                                                                                                   | descriptive                                                                                                                                                                                                                                                                                                                                                                                                                           |   |              |          |   |              |      |   |              |      |   |              |      |   |              |      |   |              |      |   |              |      |
| 102                                                                                                                                                                       | physiologic_parameters   | Physiologic parameters                                                                                                                                                                                                                                                                                                                                                                                                                                                                                                                                                                                                                                                                                                                                                                                                                                                                                                                                                                                                                                                                                                                                                                                                                                                                                                                                                                                                                                                                                                                                                                                                                                                 | descriptive                                                                                                                                                                                                                                                                                                                                                                                                                           |   |              |          |   |              |      |   |              |      |   |              |      |   |              |      |   |              |      |   |              |      |
| 103                                                                                                                                                                       | labs_2                   | Labs 2                                                                                                                                                                                                                                                                                                                                                                                                                                                                                                                                                                                                                                                                                                                                                                                                                                                                                                                                                                                                                                                                                                                                                                                                                                                                                                                                                                                                                                                                                                                                                                                                                                                                 | descriptive                                                                                                                                                                                                                                                                                                                                                                                                                           |   |              |          |   |              |      |   |              |      |   |              |      |   |              |      |   |              |      |   |              |      |
| 104                                                                                                                                                                       | physiologic_parameters_2 | Physiologic parameters 2                                                                                                                                                                                                                                                                                                                                                                                                                                                                                                                                                                                                                                                                                                                                                                                                                                                                                                                                                                                                                                                                                                                                                                                                                                                                                                                                                                                                                                                                                                                                                                                                                                               | descriptive                                                                                                                                                                                                                                                                                                                                                                                                                           |   |              |          |   |              |      |   |              |      |   |              |      |   |              |      |   |              |      |   |              |      |
| 105                                                                                                                                                                       | mechsupport_dates        | Mechanical support dates                                                                                                                                                                                                                                                                                                                                                                                                                                                                                                                                                                                                                                                                                                                                                                                                                                                                                                                                                                                                                                                                                                                                                                                                                                                                                                                                                                                                                                                                                                                                                                                                                                               | descriptive                                                                                                                                                                                                                                                                                                                                                                                                                           |   |              |          |   |              |      |   |              |      |   |              |      |   |              |      |   |              |      |   |              |      |
| 106                                                                                                                                                                       | mech_vent                | Invasive Mechanical Ventilation*                                                                                                                                                                                                                                                                                                                                                                                                                                                                                                                                                                                                                                                                                                                                                                                                                                                                                                                                                                                                                                                                                                                                                                                                                                                                                                                                                                                                                                                                                                                                                                                                                                       | checkbox<br><table border="1"> <tr><td>1</td><td>mech_vent__1</td><td>ICU Day1</td></tr> <tr><td>2</td><td>mech_vent__2</td><td>Day2</td></tr> <tr><td>3</td><td>mech_vent__3</td><td>Day3</td></tr> <tr><td>4</td><td>mech_vent__4</td><td>Day4</td></tr> <tr><td>5</td><td>mech_vent__5</td><td>Day5</td></tr> <tr><td>6</td><td>mech_vent__6</td><td>Day6</td></tr> <tr><td>7</td><td>mech_vent__7</td><td>Day7</td></tr> </table> | 1 | mech_vent__1 | ICU Day1 | 2 | mech_vent__2 | Day2 | 3 | mech_vent__3 | Day3 | 4 | mech_vent__4 | Day4 | 5 | mech_vent__5 | Day5 | 6 | mech_vent__6 | Day6 | 7 | mech_vent__7 | Day7 |
| 1                                                                                                                                                                         | mech_vent__1             | ICU Day1                                                                                                                                                                                                                                                                                                                                                                                                                                                                                                                                                                                                                                                                                                                                                                                                                                                                                                                                                                                                                                                                                                                                                                                                                                                                                                                                                                                                                                                                                                                                                                                                                                                               |                                                                                                                                                                                                                                                                                                                                                                                                                                       |   |              |          |   |              |      |   |              |      |   |              |      |   |              |      |   |              |      |   |              |      |
| 2                                                                                                                                                                         | mech_vent__2             | Day2                                                                                                                                                                                                                                                                                                                                                                                                                                                                                                                                                                                                                                                                                                                                                                                                                                                                                                                                                                                                                                                                                                                                                                                                                                                                                                                                                                                                                                                                                                                                                                                                                                                                   |                                                                                                                                                                                                                                                                                                                                                                                                                                       |   |              |          |   |              |      |   |              |      |   |              |      |   |              |      |   |              |      |   |              |      |
| 3                                                                                                                                                                         | mech_vent__3             | Day3                                                                                                                                                                                                                                                                                                                                                                                                                                                                                                                                                                                                                                                                                                                                                                                                                                                                                                                                                                                                                                                                                                                                                                                                                                                                                                                                                                                                                                                                                                                                                                                                                                                                   |                                                                                                                                                                                                                                                                                                                                                                                                                                       |   |              |          |   |              |      |   |              |      |   |              |      |   |              |      |   |              |      |   |              |      |
| 4                                                                                                                                                                         | mech_vent__4             | Day4                                                                                                                                                                                                                                                                                                                                                                                                                                                                                                                                                                                                                                                                                                                                                                                                                                                                                                                                                                                                                                                                                                                                                                                                                                                                                                                                                                                                                                                                                                                                                                                                                                                                   |                                                                                                                                                                                                                                                                                                                                                                                                                                       |   |              |          |   |              |      |   |              |      |   |              |      |   |              |      |   |              |      |   |              |      |
| 5                                                                                                                                                                         | mech_vent__5             | Day5                                                                                                                                                                                                                                                                                                                                                                                                                                                                                                                                                                                                                                                                                                                                                                                                                                                                                                                                                                                                                                                                                                                                                                                                                                                                                                                                                                                                                                                                                                                                                                                                                                                                   |                                                                                                                                                                                                                                                                                                                                                                                                                                       |   |              |          |   |              |      |   |              |      |   |              |      |   |              |      |   |              |      |   |              |      |
| 6                                                                                                                                                                         | mech_vent__6             | Day6                                                                                                                                                                                                                                                                                                                                                                                                                                                                                                                                                                                                                                                                                                                                                                                                                                                                                                                                                                                                                                                                                                                                                                                                                                                                                                                                                                                                                                                                                                                                                                                                                                                                   |                                                                                                                                                                                                                                                                                                                                                                                                                                       |   |              |          |   |              |      |   |              |      |   |              |      |   |              |      |   |              |      |   |              |      |
| 7                                                                                                                                                                         | mech_vent__7             | Day7                                                                                                                                                                                                                                                                                                                                                                                                                                                                                                                                                                                                                                                                                                                                                                                                                                                                                                                                                                                                                                                                                                                                                                                                                                                                                                                                                                                                                                                                                                                                                                                                                                                                   |                                                                                                                                                                                                                                                                                                                                                                                                                                       |   |              |          |   |              |      |   |              |      |   |              |      |   |              |      |   |              |      |   |              |      |
| 107                                                                                                                                                                       | ecmo                     | ECMO                                                                                                                                                                                                                                                                                                                                                                                                                                                                                                                                                                                                                                                                                                                                                                                                                                                                                                                                                                                                                                                                                                                                                                                                                                                                                                                                                                                                                                                                                                                                                                                                                                                                   | checkbox<br><table border="1"> <tr><td>1</td><td>ecmo__1</td><td>ICU Day1</td></tr> <tr><td>2</td><td>ecmo__2</td><td>Day2</td></tr> <tr><td>3</td><td>ecmo__3</td><td>Day3</td></tr> <tr><td>4</td><td>ecmo__4</td><td>Day4</td></tr> <tr><td>5</td><td>ecmo__5</td><td>Day5</td></tr> <tr><td>6</td><td>ecmo__6</td><td>Day6</td></tr> <tr><td>7</td><td>ecmo__7</td><td>Day7</td></tr> </table>                                    | 1 | ecmo__1      | ICU Day1 | 2 | ecmo__2      | Day2 | 3 | ecmo__3      | Day3 | 4 | ecmo__4      | Day4 | 5 | ecmo__5      | Day5 | 6 | ecmo__6      | Day6 | 7 | ecmo__7      | Day7 |
| 1                                                                                                                                                                         | ecmo__1                  | ICU Day1                                                                                                                                                                                                                                                                                                                                                                                                                                                                                                                                                                                                                                                                                                                                                                                                                                                                                                                                                                                                                                                                                                                                                                                                                                                                                                                                                                                                                                                                                                                                                                                                                                                               |                                                                                                                                                                                                                                                                                                                                                                                                                                       |   |              |          |   |              |      |   |              |      |   |              |      |   |              |      |   |              |      |   |              |      |
| 2                                                                                                                                                                         | ecmo__2                  | Day2                                                                                                                                                                                                                                                                                                                                                                                                                                                                                                                                                                                                                                                                                                                                                                                                                                                                                                                                                                                                                                                                                                                                                                                                                                                                                                                                                                                                                                                                                                                                                                                                                                                                   |                                                                                                                                                                                                                                                                                                                                                                                                                                       |   |              |          |   |              |      |   |              |      |   |              |      |   |              |      |   |              |      |   |              |      |
| 3                                                                                                                                                                         | ecmo__3                  | Day3                                                                                                                                                                                                                                                                                                                                                                                                                                                                                                                                                                                                                                                                                                                                                                                                                                                                                                                                                                                                                                                                                                                                                                                                                                                                                                                                                                                                                                                                                                                                                                                                                                                                   |                                                                                                                                                                                                                                                                                                                                                                                                                                       |   |              |          |   |              |      |   |              |      |   |              |      |   |              |      |   |              |      |   |              |      |
| 4                                                                                                                                                                         | ecmo__4                  | Day4                                                                                                                                                                                                                                                                                                                                                                                                                                                                                                                                                                                                                                                                                                                                                                                                                                                                                                                                                                                                                                                                                                                                                                                                                                                                                                                                                                                                                                                                                                                                                                                                                                                                   |                                                                                                                                                                                                                                                                                                                                                                                                                                       |   |              |          |   |              |      |   |              |      |   |              |      |   |              |      |   |              |      |   |              |      |
| 5                                                                                                                                                                         | ecmo__5                  | Day5                                                                                                                                                                                                                                                                                                                                                                                                                                                                                                                                                                                                                                                                                                                                                                                                                                                                                                                                                                                                                                                                                                                                                                                                                                                                                                                                                                                                                                                                                                                                                                                                                                                                   |                                                                                                                                                                                                                                                                                                                                                                                                                                       |   |              |          |   |              |      |   |              |      |   |              |      |   |              |      |   |              |      |   |              |      |
| 6                                                                                                                                                                         | ecmo__6                  | Day6                                                                                                                                                                                                                                                                                                                                                                                                                                                                                                                                                                                                                                                                                                                                                                                                                                                                                                                                                                                                                                                                                                                                                                                                                                                                                                                                                                                                                                                                                                                                                                                                                                                                   |                                                                                                                                                                                                                                                                                                                                                                                                                                       |   |              |          |   |              |      |   |              |      |   |              |      |   |              |      |   |              |      |   |              |      |
| 7                                                                                                                                                                         | ecmo__7                  | Day7                                                                                                                                                                                                                                                                                                                                                                                                                                                                                                                                                                                                                                                                                                                                                                                                                                                                                                                                                                                                                                                                                                                                                                                                                                                                                                                                                                                                                                                                                                                                                                                                                                                                   |                                                                                                                                                                                                                                                                                                                                                                                                                                       |   |              |          |   |              |      |   |              |      |   |              |      |   |              |      |   |              |      |   |              |      |

^ Collapse

|     |                     |                                                                                                                                                                                                                                                                                                                                                                                                                                                                               |                                                                                                                                                                                                                                                                                                                                                                                                                                               |   |               |          |   |               |      |   |               |       |   |               |       |   |               |       |   |               |       |   |               |       |
|-----|---------------------|-------------------------------------------------------------------------------------------------------------------------------------------------------------------------------------------------------------------------------------------------------------------------------------------------------------------------------------------------------------------------------------------------------------------------------------------------------------------------------|-----------------------------------------------------------------------------------------------------------------------------------------------------------------------------------------------------------------------------------------------------------------------------------------------------------------------------------------------------------------------------------------------------------------------------------------------|---|---------------|----------|---|---------------|------|---|---------------|-------|---|---------------|-------|---|---------------|-------|---|---------------|-------|---|---------------|-------|
| 108 | rrt                 | Renal Replacement Therapy (RRT)**                                                                                                                                                                                                                                                                                                                                                                                                                                             | checkbox<br><table border="1"> <tr><td>1</td><td>rrt__1</td><td>ICU Day1</td></tr> <tr><td>2</td><td>rrt__2</td><td>Day2</td></tr> <tr><td>3</td><td>rrt__3</td><td>Day3</td></tr> <tr><td>4</td><td>rrt__4</td><td>Day4</td></tr> <tr><td>5</td><td>rrt__5</td><td>Day5</td></tr> <tr><td>6</td><td>rrt__6</td><td>Day6</td></tr> <tr><td>7</td><td>rrt__7</td><td>Day7</td></tr> </table>                                                   | 1 | rrt__1        | ICU Day1 | 2 | rrt__2        | Day2 | 3 | rrt__3        | Day3  | 4 | rrt__4        | Day4  | 5 | rrt__5        | Day5  | 6 | rrt__6        | Day6  | 7 | rrt__7        | Day7  |
| 1   | rrt__1              | ICU Day1                                                                                                                                                                                                                                                                                                                                                                                                                                                                      |                                                                                                                                                                                                                                                                                                                                                                                                                                               |   |               |          |   |               |      |   |               |       |   |               |       |   |               |       |   |               |       |   |               |       |
| 2   | rrt__2              | Day2                                                                                                                                                                                                                                                                                                                                                                                                                                                                          |                                                                                                                                                                                                                                                                                                                                                                                                                                               |   |               |          |   |               |      |   |               |       |   |               |       |   |               |       |   |               |       |   |               |       |
| 3   | rrt__3              | Day3                                                                                                                                                                                                                                                                                                                                                                                                                                                                          |                                                                                                                                                                                                                                                                                                                                                                                                                                               |   |               |          |   |               |      |   |               |       |   |               |       |   |               |       |   |               |       |   |               |       |
| 4   | rrt__4              | Day4                                                                                                                                                                                                                                                                                                                                                                                                                                                                          |                                                                                                                                                                                                                                                                                                                                                                                                                                               |   |               |          |   |               |      |   |               |       |   |               |       |   |               |       |   |               |       |   |               |       |
| 5   | rrt__5              | Day5                                                                                                                                                                                                                                                                                                                                                                                                                                                                          |                                                                                                                                                                                                                                                                                                                                                                                                                                               |   |               |          |   |               |      |   |               |       |   |               |       |   |               |       |   |               |       |   |               |       |
| 6   | rrt__6              | Day6                                                                                                                                                                                                                                                                                                                                                                                                                                                                          |                                                                                                                                                                                                                                                                                                                                                                                                                                               |   |               |          |   |               |      |   |               |       |   |               |       |   |               |       |   |               |       |   |               |       |
| 7   | rrt__7              | Day7                                                                                                                                                                                                                                                                                                                                                                                                                                                                          |                                                                                                                                                                                                                                                                                                                                                                                                                                               |   |               |          |   |               |      |   |               |       |   |               |       |   |               |       |   |               |       |   |               |       |
| 109 | mech_card           | Mechanical Cardiac Support***                                                                                                                                                                                                                                                                                                                                                                                                                                                 | checkbox<br><table border="1"> <tr><td>1</td><td>mech_card__1</td><td>ICU Day1</td></tr> <tr><td>2</td><td>mech_card__2</td><td>Day2</td></tr> <tr><td>3</td><td>mech_card__3</td><td>Day3</td></tr> <tr><td>4</td><td>mech_card__4</td><td>Day4</td></tr> <tr><td>5</td><td>mech_card__5</td><td>Day5</td></tr> <tr><td>6</td><td>mech_card__6</td><td>Day6</td></tr> <tr><td>7</td><td>mech_card__7</td><td>Day7</td></tr> </table>         | 1 | mech_card__1  | ICU Day1 | 2 | mech_card__2  | Day2 | 3 | mech_card__3  | Day3  | 4 | mech_card__4  | Day4  | 5 | mech_card__5  | Day5  | 6 | mech_card__6  | Day6  | 7 | mech_card__7  | Day7  |
| 1   | mech_card__1        | ICU Day1                                                                                                                                                                                                                                                                                                                                                                                                                                                                      |                                                                                                                                                                                                                                                                                                                                                                                                                                               |   |               |          |   |               |      |   |               |       |   |               |       |   |               |       |   |               |       |   |               |       |
| 2   | mech_card__2        | Day2                                                                                                                                                                                                                                                                                                                                                                                                                                                                          |                                                                                                                                                                                                                                                                                                                                                                                                                                               |   |               |          |   |               |      |   |               |       |   |               |       |   |               |       |   |               |       |   |               |       |
| 3   | mech_card__3        | Day3                                                                                                                                                                                                                                                                                                                                                                                                                                                                          |                                                                                                                                                                                                                                                                                                                                                                                                                                               |   |               |          |   |               |      |   |               |       |   |               |       |   |               |       |   |               |       |   |               |       |
| 4   | mech_card__4        | Day4                                                                                                                                                                                                                                                                                                                                                                                                                                                                          |                                                                                                                                                                                                                                                                                                                                                                                                                                               |   |               |          |   |               |      |   |               |       |   |               |       |   |               |       |   |               |       |   |               |       |
| 5   | mech_card__5        | Day5                                                                                                                                                                                                                                                                                                                                                                                                                                                                          |                                                                                                                                                                                                                                                                                                                                                                                                                                               |   |               |          |   |               |      |   |               |       |   |               |       |   |               |       |   |               |       |   |               |       |
| 6   | mech_card__6        | Day6                                                                                                                                                                                                                                                                                                                                                                                                                                                                          |                                                                                                                                                                                                                                                                                                                                                                                                                                               |   |               |          |   |               |      |   |               |       |   |               |       |   |               |       |   |               |       |   |               |       |
| 7   | mech_card__7        | Day7                                                                                                                                                                                                                                                                                                                                                                                                                                                                          |                                                                                                                                                                                                                                                                                                                                                                                                                                               |   |               |          |   |               |      |   |               |       |   |               |       |   |               |       |   |               |       |   |               |       |
| 110 | mech_support_desc   | Check the box if the patient received any of the associated therapies on that day*If a patient received any invasive mechanical ventilation that day, check the box, even if they were extubated that day.**For patients who received RRT intermittently (e.g., every other day), continue to check the box as long as they are RRT-dependent, even if they didn't actually receive RRT on that specific day***Includes Impella, Intra-aortic balloon pump (IABP), LVAD, RVAD | descriptive                                                                                                                                                                                                                                                                                                                                                                                                                                   |   |               |          |   |               |      |   |               |       |   |               |       |   |               |       |   |               |       |   |               |       |
| 111 | mechsupport_dates_2 | Mechanical support dates 2                                                                                                                                                                                                                                                                                                                                                                                                                                                    | descriptive                                                                                                                                                                                                                                                                                                                                                                                                                                   |   |               |          |   |               |      |   |               |       |   |               |       |   |               |       |   |               |       |   |               |       |
| 112 | mech_vent2          | Invasive Mechanical Ventilation*                                                                                                                                                                                                                                                                                                                                                                                                                                              | checkbox<br><table border="1"> <tr><td>1</td><td>mech_vent2__1</td><td>Day8</td></tr> <tr><td>2</td><td>mech_vent2__2</td><td>Day9</td></tr> <tr><td>3</td><td>mech_vent2__3</td><td>Day10</td></tr> <tr><td>4</td><td>mech_vent2__4</td><td>Day11</td></tr> <tr><td>5</td><td>mech_vent2__5</td><td>Day12</td></tr> <tr><td>6</td><td>mech_vent2__6</td><td>Day13</td></tr> <tr><td>7</td><td>mech_vent2__7</td><td>Day14</td></tr> </table> | 1 | mech_vent2__1 | Day8     | 2 | mech_vent2__2 | Day9 | 3 | mech_vent2__3 | Day10 | 4 | mech_vent2__4 | Day11 | 5 | mech_vent2__5 | Day12 | 6 | mech_vent2__6 | Day13 | 7 | mech_vent2__7 | Day14 |
| 1   | mech_vent2__1       | Day8                                                                                                                                                                                                                                                                                                                                                                                                                                                                          |                                                                                                                                                                                                                                                                                                                                                                                                                                               |   |               |          |   |               |      |   |               |       |   |               |       |   |               |       |   |               |       |   |               |       |
| 2   | mech_vent2__2       | Day9                                                                                                                                                                                                                                                                                                                                                                                                                                                                          |                                                                                                                                                                                                                                                                                                                                                                                                                                               |   |               |          |   |               |      |   |               |       |   |               |       |   |               |       |   |               |       |   |               |       |
| 3   | mech_vent2__3       | Day10                                                                                                                                                                                                                                                                                                                                                                                                                                                                         |                                                                                                                                                                                                                                                                                                                                                                                                                                               |   |               |          |   |               |      |   |               |       |   |               |       |   |               |       |   |               |       |   |               |       |
| 4   | mech_vent2__4       | Day11                                                                                                                                                                                                                                                                                                                                                                                                                                                                         |                                                                                                                                                                                                                                                                                                                                                                                                                                               |   |               |          |   |               |      |   |               |       |   |               |       |   |               |       |   |               |       |   |               |       |
| 5   | mech_vent2__5       | Day12                                                                                                                                                                                                                                                                                                                                                                                                                                                                         |                                                                                                                                                                                                                                                                                                                                                                                                                                               |   |               |          |   |               |      |   |               |       |   |               |       |   |               |       |   |               |       |   |               |       |
| 6   | mech_vent2__6       | Day13                                                                                                                                                                                                                                                                                                                                                                                                                                                                         |                                                                                                                                                                                                                                                                                                                                                                                                                                               |   |               |          |   |               |      |   |               |       |   |               |       |   |               |       |   |               |       |   |               |       |
| 7   | mech_vent2__7       | Day14                                                                                                                                                                                                                                                                                                                                                                                                                                                                         |                                                                                                                                                                                                                                                                                                                                                                                                                                               |   |               |          |   |               |      |   |               |       |   |               |       |   |               |       |   |               |       |   |               |       |
| 113 | ecmo_2              | ECMO                                                                                                                                                                                                                                                                                                                                                                                                                                                                          | checkbox<br><table border="1"> <tr><td>1</td><td>ecmo_2__1</td><td>Day8</td></tr> <tr><td>2</td><td>ecmo_2__2</td><td>Day9</td></tr> <tr><td>3</td><td>ecmo_2__3</td><td>Day10</td></tr> <tr><td>4</td><td>ecmo_2__4</td><td>Day11</td></tr> <tr><td>5</td><td>ecmo_2__5</td><td>Day12</td></tr> <tr><td>6</td><td>ecmo_2__6</td><td>Day13</td></tr> <tr><td>7</td><td>ecmo_2__7</td><td>Day14</td></tr> </table>                             | 1 | ecmo_2__1     | Day8     | 2 | ecmo_2__2     | Day9 | 3 | ecmo_2__3     | Day10 | 4 | ecmo_2__4     | Day11 | 5 | ecmo_2__5     | Day12 | 6 | ecmo_2__6     | Day13 | 7 | ecmo_2__7     | Day14 |
| 1   | ecmo_2__1           | Day8                                                                                                                                                                                                                                                                                                                                                                                                                                                                          |                                                                                                                                                                                                                                                                                                                                                                                                                                               |   |               |          |   |               |      |   |               |       |   |               |       |   |               |       |   |               |       |   |               |       |
| 2   | ecmo_2__2           | Day9                                                                                                                                                                                                                                                                                                                                                                                                                                                                          |                                                                                                                                                                                                                                                                                                                                                                                                                                               |   |               |          |   |               |      |   |               |       |   |               |       |   |               |       |   |               |       |   |               |       |
| 3   | ecmo_2__3           | Day10                                                                                                                                                                                                                                                                                                                                                                                                                                                                         |                                                                                                                                                                                                                                                                                                                                                                                                                                               |   |               |          |   |               |      |   |               |       |   |               |       |   |               |       |   |               |       |   |               |       |
| 4   | ecmo_2__4           | Day11                                                                                                                                                                                                                                                                                                                                                                                                                                                                         |                                                                                                                                                                                                                                                                                                                                                                                                                                               |   |               |          |   |               |      |   |               |       |   |               |       |   |               |       |   |               |       |   |               |       |
| 5   | ecmo_2__5           | Day12                                                                                                                                                                                                                                                                                                                                                                                                                                                                         |                                                                                                                                                                                                                                                                                                                                                                                                                                               |   |               |          |   |               |      |   |               |       |   |               |       |   |               |       |   |               |       |   |               |       |
| 6   | ecmo_2__6           | Day13                                                                                                                                                                                                                                                                                                                                                                                                                                                                         |                                                                                                                                                                                                                                                                                                                                                                                                                                               |   |               |          |   |               |      |   |               |       |   |               |       |   |               |       |   |               |       |   |               |       |
| 7   | ecmo_2__7           | Day14                                                                                                                                                                                                                                                                                                                                                                                                                                                                         |                                                                                                                                                                                                                                                                                                                                                                                                                                               |   |               |          |   |               |      |   |               |       |   |               |       |   |               |       |   |               |       |   |               |       |
| 114 | rrt_2               | Renal Replacement Therapy (RRT)**                                                                                                                                                                                                                                                                                                                                                                                                                                             | checkbox<br><table border="1"> <tr><td>1</td><td>rrt_2__1</td><td>Day8</td></tr> <tr><td>2</td><td>rrt_2__2</td><td>Day9</td></tr> <tr><td>3</td><td>rrt_2__3</td><td>Day10</td></tr> <tr><td>4</td><td>rrt_2__4</td><td>Day11</td></tr> <tr><td>5</td><td>rrt_2__5</td><td>Day12</td></tr> <tr><td>6</td><td>rrt_2__6</td><td>Day13</td></tr> <tr><td>7</td><td>rrt_2__7</td><td>Day14</td></tr> </table>                                    | 1 | rrt_2__1      | Day8     | 2 | rrt_2__2      | Day9 | 3 | rrt_2__3      | Day10 | 4 | rrt_2__4      | Day11 | 5 | rrt_2__5      | Day12 | 6 | rrt_2__6      | Day13 | 7 | rrt_2__7      | Day14 |
| 1   | rrt_2__1            | Day8                                                                                                                                                                                                                                                                                                                                                                                                                                                                          |                                                                                                                                                                                                                                                                                                                                                                                                                                               |   |               |          |   |               |      |   |               |       |   |               |       |   |               |       |   |               |       |   |               |       |
| 2   | rrt_2__2            | Day9                                                                                                                                                                                                                                                                                                                                                                                                                                                                          |                                                                                                                                                                                                                                                                                                                                                                                                                                               |   |               |          |   |               |      |   |               |       |   |               |       |   |               |       |   |               |       |   |               |       |
| 3   | rrt_2__3            | Day10                                                                                                                                                                                                                                                                                                                                                                                                                                                                         |                                                                                                                                                                                                                                                                                                                                                                                                                                               |   |               |          |   |               |      |   |               |       |   |               |       |   |               |       |   |               |       |   |               |       |
| 4   | rrt_2__4            | Day11                                                                                                                                                                                                                                                                                                                                                                                                                                                                         |                                                                                                                                                                                                                                                                                                                                                                                                                                               |   |               |          |   |               |      |   |               |       |   |               |       |   |               |       |   |               |       |   |               |       |
| 5   | rrt_2__5            | Day12                                                                                                                                                                                                                                                                                                                                                                                                                                                                         |                                                                                                                                                                                                                                                                                                                                                                                                                                               |   |               |          |   |               |      |   |               |       |   |               |       |   |               |       |   |               |       |   |               |       |
| 6   | rrt_2__6            | Day13                                                                                                                                                                                                                                                                                                                                                                                                                                                                         |                                                                                                                                                                                                                                                                                                                                                                                                                                               |   |               |          |   |               |      |   |               |       |   |               |       |   |               |       |   |               |       |   |               |       |
| 7   | rrt_2__7            | Day14                                                                                                                                                                                                                                                                                                                                                                                                                                                                         |                                                                                                                                                                                                                                                                                                                                                                                                                                               |   |               |          |   |               |      |   |               |       |   |               |       |   |               |       |   |               |       |   |               |       |

|     |                                                                                                                                                                                                                                                                                                                                                                                                          |                                                                                                                                                                     |                                                                                                                                                                                                                                                                                                                                                                                                                                               |   |                             |         |                                     |                           |                                  |   |                           |       |       |                           |       |   |                           |       |   |               |       |   |               |       |
|-----|----------------------------------------------------------------------------------------------------------------------------------------------------------------------------------------------------------------------------------------------------------------------------------------------------------------------------------------------------------------------------------------------------------|---------------------------------------------------------------------------------------------------------------------------------------------------------------------|-----------------------------------------------------------------------------------------------------------------------------------------------------------------------------------------------------------------------------------------------------------------------------------------------------------------------------------------------------------------------------------------------------------------------------------------------|---|-----------------------------|---------|-------------------------------------|---------------------------|----------------------------------|---|---------------------------|-------|-------|---------------------------|-------|---|---------------------------|-------|---|---------------|-------|---|---------------|-------|
| 115 | mech_card2                                                                                                                                                                                                                                                                                                                                                                                               | Mechanical Cardiac Support***                                                                                                                                       | checkbox<br><table border="1"> <tr><td>1</td><td>mech_card2__1</td><td>Day8</td></tr> <tr><td>2</td><td>mech_card2__2</td><td>Day9</td></tr> <tr><td>3</td><td>mech_card2__3</td><td>Day10</td></tr> <tr><td>4</td><td>mech_card2__4</td><td>Day11</td></tr> <tr><td>5</td><td>mech_card2__5</td><td>Day12</td></tr> <tr><td>6</td><td>mech_card2__6</td><td>Day13</td></tr> <tr><td>7</td><td>mech_card2__7</td><td>Day14</td></tr> </table> | 1 | mech_card2__1               | Day8    | 2                                   | mech_card2__2             | Day9                             | 3 | mech_card2__3             | Day10 | 4     | mech_card2__4             | Day11 | 5 | mech_card2__5             | Day12 | 6 | mech_card2__6 | Day13 | 7 | mech_card2__7 | Day14 |
| 1   | mech_card2__1                                                                                                                                                                                                                                                                                                                                                                                            | Day8                                                                                                                                                                |                                                                                                                                                                                                                                                                                                                                                                                                                                               |   |                             |         |                                     |                           |                                  |   |                           |       |       |                           |       |   |                           |       |   |               |       |   |               |       |
| 2   | mech_card2__2                                                                                                                                                                                                                                                                                                                                                                                            | Day9                                                                                                                                                                |                                                                                                                                                                                                                                                                                                                                                                                                                                               |   |                             |         |                                     |                           |                                  |   |                           |       |       |                           |       |   |                           |       |   |               |       |   |               |       |
| 3   | mech_card2__3                                                                                                                                                                                                                                                                                                                                                                                            | Day10                                                                                                                                                               |                                                                                                                                                                                                                                                                                                                                                                                                                                               |   |                             |         |                                     |                           |                                  |   |                           |       |       |                           |       |   |                           |       |   |               |       |   |               |       |
| 4   | mech_card2__4                                                                                                                                                                                                                                                                                                                                                                                            | Day11                                                                                                                                                               |                                                                                                                                                                                                                                                                                                                                                                                                                                               |   |                             |         |                                     |                           |                                  |   |                           |       |       |                           |       |   |                           |       |   |               |       |   |               |       |
| 5   | mech_card2__5                                                                                                                                                                                                                                                                                                                                                                                            | Day12                                                                                                                                                               |                                                                                                                                                                                                                                                                                                                                                                                                                                               |   |                             |         |                                     |                           |                                  |   |                           |       |       |                           |       |   |                           |       |   |               |       |   |               |       |
| 6   | mech_card2__6                                                                                                                                                                                                                                                                                                                                                                                            | Day13                                                                                                                                                               |                                                                                                                                                                                                                                                                                                                                                                                                                                               |   |                             |         |                                     |                           |                                  |   |                           |       |       |                           |       |   |                           |       |   |               |       |   |               |       |
| 7   | mech_card2__7                                                                                                                                                                                                                                                                                                                                                                                            | Day14                                                                                                                                                               |                                                                                                                                                                                                                                                                                                                                                                                                                                               |   |                             |         |                                     |                           |                                  |   |                           |       |       |                           |       |   |                           |       |   |               |       |   |               |       |
| 116 | type_ecmo<br>Show the field ONLY if:<br>[ecmo(1)] = '1' or [ecmo(2)] = '1' or [ecmo(3)] = '1' or [ecmo(4)] = '1' or [ecmo(5)] = '1' or [ecmo(6)] = '1' or [ecmo(7)] = '1' or [ecmo_2(1)] = '1' or [ecmo_2(2)] = '1' or [ecmo_2(3)] = '1' or [ecmo_2(4)] = '1' or [ecmo_2(5)] = '1' or [ecmo_2(6)] = '1' or [ecmo_2(7)] = '1'                                                                             | Type of ECMO                                                                                                                                                        | radio, Required<br><table border="1"> <tr><td>1</td><td>Veno-venous (V-V)</td></tr> <tr><td>2</td><td>Veno-arterial (V-A)</td></tr> <tr><td>3</td><td>Veno-arterial-venous (V-A-V)</td></tr> </table>                                                                                                                                                                                                                                         | 1 | Veno-venous (V-V)           | 2       | Veno-arterial (V-A)                 | 3                         | Veno-arterial-venous (V-A-V)     |   |                           |       |       |                           |       |   |                           |       |   |               |       |   |               |       |
| 1   | Veno-venous (V-V)                                                                                                                                                                                                                                                                                                                                                                                        |                                                                                                                                                                     |                                                                                                                                                                                                                                                                                                                                                                                                                                               |   |                             |         |                                     |                           |                                  |   |                           |       |       |                           |       |   |                           |       |   |               |       |   |               |       |
| 2   | Veno-arterial (V-A)                                                                                                                                                                                                                                                                                                                                                                                      |                                                                                                                                                                     |                                                                                                                                                                                                                                                                                                                                                                                                                                               |   |                             |         |                                     |                           |                                  |   |                           |       |       |                           |       |   |                           |       |   |               |       |   |               |       |
| 3   | Veno-arterial-venous (V-A-V)                                                                                                                                                                                                                                                                                                                                                                             |                                                                                                                                                                     |                                                                                                                                                                                                                                                                                                                                                                                                                                               |   |                             |         |                                     |                           |                                  |   |                           |       |       |                           |       |   |                           |       |   |               |       |   |               |       |
| 117 | ecmo_decannulated<br>Show the field ONLY if:<br>[ecmo(1)] = '1' or [ecmo(2)] = '1' or [ecmo(3)] = '1' or [ecmo(4)] = '1' or [ecmo(5)] = '1' or [ecmo(6)] = '1' or [ecmo(7)] = '1' or [ecmo_2(1)] = '1' or [ecmo_2(2)] = '1' or [ecmo_2(3)] = '1' or [ecmo_2(4)] = '1' or [ecmo_2(5)] = '1' or [ecmo_2(6)] = '1' or [ecmo_2(7)] = '1'                                                                     | Was the ECMO successfully decannulated (removed) during the first 14 days following ICU admission?If the ECMO was decannulated for palliative purposes, select "no" | yesno, Required<br><table border="1"> <tr><td>1</td><td>Yes</td></tr> <tr><td>0</td><td>No</td></tr> </table>                                                                                                                                                                                                                                                                                                                                 | 1 | Yes                         | 0       | No                                  |                           |                                  |   |                           |       |       |                           |       |   |                           |       |   |               |       |   |               |       |
| 1   | Yes                                                                                                                                                                                                                                                                                                                                                                                                      |                                                                                                                                                                     |                                                                                                                                                                                                                                                                                                                                                                                                                                               |   |                             |         |                                     |                           |                                  |   |                           |       |       |                           |       |   |                           |       |   |               |       |   |               |       |
| 0   | No                                                                                                                                                                                                                                                                                                                                                                                                       |                                                                                                                                                                     |                                                                                                                                                                                                                                                                                                                                                                                                                                               |   |                             |         |                                     |                           |                                  |   |                           |       |       |                           |       |   |                           |       |   |               |       |   |               |       |
| 118 | date_ecmo_decan<br>Show the field ONLY if:<br>[ecmo_decannulated] = '1'                                                                                                                                                                                                                                                                                                                                  | Date ECMO was decannulated                                                                                                                                          | text (date_mdy), Required                                                                                                                                                                                                                                                                                                                                                                                                                     |   |                             |         |                                     |                           |                                  |   |                           |       |       |                           |       |   |                           |       |   |               |       |   |               |       |
| 119 | type_rrt<br>Show the field ONLY if:<br>[rrt(1)] = '1' or [rrt(2)] = '1' or [rrt(3)] = '1' or [rrt(4)] = '1' or [rrt(5)] = '1' or [rrt(6)] = '1' or [rrt(7)] = '1' or [rrt_2(1)] = '1' or [rrt_2(2)] = '1' or [rrt_2(3)] = '1' or [rrt_2(4)] = '1' or [rrt_2(5)] = '1' or [rrt_2(6)] = '1' or [rrt_2(7)] = '1'                                                                                            | Initial mode of RRT                                                                                                                                                 | radio, Required<br><table border="1"> <tr><td>1</td><td>Continuous (CRRT) - 24h/day</td></tr> <tr><td>2</td><td>Continuous (CRRT) - 12h/day or less</td></tr> <tr><td>3</td><td>Intermittent hemodialysis</td></tr> <tr><td>4</td><td>Peritoneal dialysis</td></tr> <tr><td>5</td><td>Other</td></tr> </table>                                                                                                                                | 1 | Continuous (CRRT) - 24h/day | 2       | Continuous (CRRT) - 12h/day or less | 3                         | Intermittent hemodialysis        | 4 | Peritoneal dialysis       | 5     | Other |                           |       |   |                           |       |   |               |       |   |               |       |
| 1   | Continuous (CRRT) - 24h/day                                                                                                                                                                                                                                                                                                                                                                              |                                                                                                                                                                     |                                                                                                                                                                                                                                                                                                                                                                                                                                               |   |                             |         |                                     |                           |                                  |   |                           |       |       |                           |       |   |                           |       |   |               |       |   |               |       |
| 2   | Continuous (CRRT) - 12h/day or less                                                                                                                                                                                                                                                                                                                                                                      |                                                                                                                                                                     |                                                                                                                                                                                                                                                                                                                                                                                                                                               |   |                             |         |                                     |                           |                                  |   |                           |       |       |                           |       |   |                           |       |   |               |       |   |               |       |
| 3   | Intermittent hemodialysis                                                                                                                                                                                                                                                                                                                                                                                |                                                                                                                                                                     |                                                                                                                                                                                                                                                                                                                                                                                                                                               |   |                             |         |                                     |                           |                                  |   |                           |       |       |                           |       |   |                           |       |   |               |       |   |               |       |
| 4   | Peritoneal dialysis                                                                                                                                                                                                                                                                                                                                                                                      |                                                                                                                                                                     |                                                                                                                                                                                                                                                                                                                                                                                                                                               |   |                             |         |                                     |                           |                                  |   |                           |       |       |                           |       |   |                           |       |   |               |       |   |               |       |
| 5   | Other                                                                                                                                                                                                                                                                                                                                                                                                    |                                                                                                                                                                     |                                                                                                                                                                                                                                                                                                                                                                                                                                               |   |                             |         |                                     |                           |                                  |   |                           |       |       |                           |       |   |                           |       |   |               |       |   |               |       |
| 120 | type_mech_card_support<br>Show the field ONLY if:<br>[mech_card(1)] = '1' or [mech_card(2)] = '1' or [mech_card(3)] = '1' or [mech_card(4)] = '1' or [mech_card(5)] = '1' or [mech_card(6)] = '1' or [mech_card(7)] = '1' or [mech_card2(1)] = '1' or [mech_card2(2)] = '1' or [mech_card2(3)] = '1' or [mech_card2(4)] = '1' or [mech_card2(5)] = '1' or [mech_card2(6)] = '1' or [mech_card2(7)] = '1' | Type of mechanical cardiac support (select all that apply)                                                                                                          | checkbox, Required<br><table border="1"> <tr><td>1</td><td>type_mech_card_support__1</td><td>Impella</td></tr> <tr><td>2</td><td>type_mech_card_support__2</td><td>Intra-aortic balloon pump (IABP)</td></tr> <tr><td>3</td><td>type_mech_card_support__3</td><td>LVAD</td></tr> <tr><td>4</td><td>type_mech_card_support__4</td><td>RVAD</td></tr> <tr><td>5</td><td>type_mech_card_support__5</td><td>Other</td></tr> </table>              | 1 | type_mech_card_support__1   | Impella | 2                                   | type_mech_card_support__2 | Intra-aortic balloon pump (IABP) | 3 | type_mech_card_support__3 | LVAD  | 4     | type_mech_card_support__4 | RVAD  | 5 | type_mech_card_support__5 | Other |   |               |       |   |               |       |
| 1   | type_mech_card_support__1                                                                                                                                                                                                                                                                                                                                                                                | Impella                                                                                                                                                             |                                                                                                                                                                                                                                                                                                                                                                                                                                               |   |                             |         |                                     |                           |                                  |   |                           |       |       |                           |       |   |                           |       |   |               |       |   |               |       |
| 2   | type_mech_card_support__2                                                                                                                                                                                                                                                                                                                                                                                | Intra-aortic balloon pump (IABP)                                                                                                                                    |                                                                                                                                                                                                                                                                                                                                                                                                                                               |   |                             |         |                                     |                           |                                  |   |                           |       |       |                           |       |   |                           |       |   |               |       |   |               |       |
| 3   | type_mech_card_support__3                                                                                                                                                                                                                                                                                                                                                                                | LVAD                                                                                                                                                                |                                                                                                                                                                                                                                                                                                                                                                                                                                               |   |                             |         |                                     |                           |                                  |   |                           |       |       |                           |       |   |                           |       |   |               |       |   |               |       |
| 4   | type_mech_card_support__4                                                                                                                                                                                                                                                                                                                                                                                | RVAD                                                                                                                                                                |                                                                                                                                                                                                                                                                                                                                                                                                                                               |   |                             |         |                                     |                           |                                  |   |                           |       |       |                           |       |   |                           |       |   |               |       |   |               |       |
| 5   | type_mech_card_support__5                                                                                                                                                                                                                                                                                                                                                                                | Other                                                                                                                                                               |                                                                                                                                                                                                                                                                                                                                                                                                                                               |   |                             |         |                                     |                           |                                  |   |                           |       |       |                           |       |   |                           |       |   |               |       |   |               |       |
| 121 | other_mech_card_support<br>Show the field ONLY if:<br>[type_mech_card_support(5)] = '1'                                                                                                                                                                                                                                                                                                                  | Enter other mechanical cardiac support                                                                                                                              | text, Required                                                                                                                                                                                                                                                                                                                                                                                                                                |   |                             |         |                                     |                           |                                  |   |                           |       |       |                           |       |   |                           |       |   |               |       |   |               |       |
| 122 | mech_date_d1                                                                                                                                                                                                                                                                                                                                                                                             | Mech support dates 1                                                                                                                                                | text (date_mdy)                                                                                                                                                                                                                                                                                                                                                                                                                               |   |                             |         |                                     |                           |                                  |   |                           |       |       |                           |       |   |                           |       |   |               |       |   |               |       |

|     |               |                             |                                 |
|-----|---------------|-----------------------------|---------------------------------|
| 123 | mech_date_d2  | Mech support dates 2        | text (date_mdy)                 |
| 124 | mech_date_d3  | Mech support dates 3        | text (date_mdy)                 |
| 125 | mech_date_d4  | Mech support dates 4        | text (date_mdy)                 |
| 126 | mech_date_d5  | Mech support dates 5        | text (date_mdy)                 |
| 127 | mech_date_d6  | Mech support dates 6        | text (date_mdy)                 |
| 128 | mech_date_d7  | Mech support dates 7        | text (date_mdy)                 |
| 129 | mech_date_d8  | Mech support dates 8        | text (date_mdy)                 |
| 130 | mech_date_d9  | Mech support dates 9        | text (date_mdy)                 |
| 131 | mech_date_d10 | Mech support dates 10       | text (date_mdy)                 |
| 132 | mech_date_d11 | Mech support dates 11       | text (date_mdy)                 |
| 133 | mech_date_d12 | Mech support dates 12       | text (date_mdy)                 |
| 134 | mech_date_d13 | Mech support dates 13       | text (date_mdy)                 |
| 135 | mech_date_d14 | Mech support dates 14       | text (date_mdy)                 |
| 136 | labs_date_d1  | Labs Date Day 1             | text (date_mdy)                 |
| 137 | labs_date_d2  | Labs Date Day 2             | text (date_mdy)                 |
| 138 | labs_date_d3  | Labs Date Day 3             | text (date_mdy)                 |
| 139 | labs_date_d4  | Labs Date Day 4             | text (date_mdy)                 |
| 140 | labs_date_d5  | Labs Date Day 5             | text (date_mdy)                 |
| 141 | labs_date_d6  | Labs Date Day 6             | text (date_mdy)                 |
| 142 | labs_date_d7  | Labs Date Day 7             | text (date_mdy)                 |
| 143 | labs_date_d8  | Labs Date Day 8             | text (date_mdy)                 |
| 144 | labs_date_d9  | Labs Date Day 9             | text (date_mdy)                 |
| 145 | labs_date_d10 | Labs Date Day 10            | text (date_mdy)                 |
| 146 | labs_date_d11 | Labs Date Day 11            | text (date_mdy)                 |
| 147 | labs_date_d12 | Labs Date Day 12            | text (date_mdy)                 |
| 148 | labs_date_d13 | Labs Date Day 13            | text (date_mdy)                 |
| 149 | labs_date_d14 | Labs Date Day 14            | text (date_mdy)                 |
| 150 | whitecell_d1  | White cell count day 1      | text (number, Min: 0, Max: 200) |
| 151 | whitecell_d2  | White cell count day 2      | text (number, Min: 0, Max: 200) |
| 152 | whitecell_d3  | White cell count day 3      | text (number, Min: 0, Max: 200) |
| 153 | whitecell_d4  | White cell count day 4      | text (number, Min: 0, Max: 200) |
| 154 | whitecell_d5  | White cell count day 5      | text (number, Min: 0, Max: 200) |
| 155 | whitecell_d6  | White cell count day 6      | text (number, Min: 0, Max: 200) |
| 156 | whitecell_d7  | White cell count day 7      | text (number, Min: 0, Max: 200) |
| 157 | whitecell_d8  | White cell count day 8      | text (number, Min: 0, Max: 200) |
| 158 | whitecell_d9  | White cell count day 9      | text (number, Min: 0, Max: 200) |
| 159 | whitecell_d10 | White cell count day 10     | text (number, Min: 0, Max: 200) |
| 160 | whitecell_d11 | White cell count day 11     | text (number, Min: 0, Max: 200) |
| 161 | whitecell_d12 | White cell count day 12     | text (number, Min: 0, Max: 200) |
| 162 | whitecell_d13 | White cell count day 13     | text (number, Min: 0, Max: 200) |
| 163 | whitecell_d14 | White cell count day 14     | text (number, Min: 0, Max: 200) |
| 164 | lymphocyte_d1 | Lymphocyte percentage day 1 | text (number, Min: 0, Max: 100) |
| 165 | lymphocyte_d2 | Lymphocyte percentage day 2 | text (number, Min: 0, Max: 100) |
| 166 | lymphocyte_d3 | Lymphocyte percentage day 3 | text (number, Min: 0, Max: 100) |
| 167 | lymphocyte_d4 | Lymphocyte percentage day 4 | text (number, Min: 0, Max: 100) |
| 168 | lymphocyte_d5 | Lymphocyte percentage day 5 | text (number, Min: 0, Max: 100) |
| 169 | lymphocyte_d6 | Lymphocyte percentage day 6 | text (number, Min: 0, Max: 100) |
| 170 | lymphocyte_d7 | Lymphocyte percentage day 7 | text (number, Min: 0, Max: 100) |

|     |                |                              |                                      |
|-----|----------------|------------------------------|--------------------------------------|
| 171 | lymphocyte_d8  | Lymphocyte percentage day 8  | text (number, Min: 0, Max: 100)      |
| 172 | lymphocyte_d9  | Lymphocyte percentage day 9  | text (number, Min: 0, Max: 100)      |
| 173 | lymphocyte_d10 | Lymphocyte percentage day 10 | text (number, Min: 0, Max: 100)      |
| 174 | lymphocyte_d11 | Lymphocyte percentage day 11 | text (number, Min: 0, Max: 100)      |
| 175 | lymphocyte_d12 | Lymphocyte percentage day 12 | text (number, Min: 0, Max: 100)      |
| 176 | lymphocyte_d13 | Lymphocyte percentage day 13 | text (number, Min: 0, Max: 100)      |
| 177 | lymphocyte_d14 | Lymphocyte percentage day 14 | text (number, Min: 0, Max: 100)      |
| 178 | hemoglobin_d1  | Hemoglobin Day 1             | text (number, Min: 3, Max: 20)       |
| 179 | hemoglobin_d2  | Hemoglobin Day 2             | text (number, Min: 3, Max: 20)       |
| 180 | hemoglobin_d3  | Hemoglobin Day 3             | text (number, Min: 3, Max: 20)       |
| 181 | hemoglobin_d4  | Hemoglobin Day 4             | text (number, Min: 3, Max: 20)       |
| 182 | hemoglobin_d5  | Hemoglobin Day 5             | text (number, Min: 3, Max: 20)       |
| 183 | hemoglobin_d6  | Hemoglobin Day 6             | text (number, Min: 3, Max: 20)       |
| 184 | hemoglobin_d7  | Hemoglobin Day 7             | text (number, Min: 3, Max: 20)       |
| 185 | hemoglobin_d8  | Hemoglobin Day 8             | text (number, Min: 3, Max: 20)       |
| 186 | hemoglobin_d9  | Hemoglobin Day 9             | text (number, Min: 3, Max: 20)       |
| 187 | hemoglobin_d10 | Hemoglobin Day 10            | text (number, Min: 3, Max: 20)       |
| 188 | hemoglobin_d11 | Hemoglobin Day 11            | text (number, Min: 3, Max: 20)       |
| 189 | hemoglobin_d12 | Hemoglobin Day 12            | text (number, Min: 3, Max: 20)       |
| 190 | hemoglobin_d13 | Hemoglobin Day 13            | text (number, Min: 3, Max: 20)       |
| 191 | hemoglobin_d14 | Hemoglobin Day 14            | text (number, Min: 3, Max: 20)       |
| 192 | platelet_d1    | Platelet count day 1         | text (integer, Min: 0, Max: 1000000) |
| 193 | platelet_d2    | Platelet count day 2         | text (integer, Min: 0, Max: 1000000) |
| 194 | platelet_d3    | Platelet count day 3         | text (integer, Min: 0, Max: 1000000) |
| 195 | platelet_d4    | Platelet count day 4         | text (integer, Min: 0, Max: 1000000) |
| 196 | platelet_d5    | Platelet count day 5         | text (integer, Min: 0, Max: 1000000) |
| 197 | platelet_d6    | Platelet count day 6         | text (integer, Min: 0, Max: 1000000) |
| 198 | platelet_d7    | Platelet count day 7         | text (integer, Min: 0, Max: 1000000) |
| 199 | platelet_d8    | Platelet count day 8         | text (integer, Min: 0, Max: 1000000) |
| 200 | platelet_d9    | Platelet count day 9         | text (integer, Min: 0, Max: 1000000) |
| 201 | platelet_d10   | Platelet count day 10        | text (integer, Min: 0, Max: 1000000) |
| 202 | platelet_d11   | Platelet count day 11        | text (integer, Min: 0, Max: 1000000) |
| 203 | platelet_d12   | Platelet count day 12        | text (integer, Min: 0, Max: 1000000) |
| 204 | platelet_d13   | Platelet count day 13        | text (integer, Min: 0, Max: 1000000) |
| 205 | platelet_d14   | Platelet count day 14        | text (integer, Min: 0, Max: 1000000) |
| 206 | creatinine_d1  | Creatinine Day 1             | text (number, Min: 0.1, Max: 8)      |
| 207 | creatinine_d2  | Creatinine day 2             | text (number, Min: 0.1, Max: 8)      |
| 208 | creatinine_d3  | Creatinine day 3             | text (number, Min: 0.1, Max: 8)      |
| 209 | creatinine_d4  | Creatinine day 4             | text (number, Min: 0.1, Max: 8)      |
| 210 | creatinine_d5  | Creatinine day 5             | text (number, Min: 0.1, Max: 8)      |
| 211 | creatinine_d6  | Creatinine day 6             | text (number, Min: 0.1, Max: 8)      |
| 212 | creatinine_d7  | Creatinine day 7             | text (number, Min: 0.1, Max: 8)      |
| 213 | creatinine_d8  | Creatinine day 8             | text (number, Min: 0.1, Max: 8)      |
| 214 | creatinine_d9  | Creatinine day 9             | text (number, Min: 0.1, Max: 9)      |
| 215 | creatinine_d10 | Creatinine day 10            | text (number, Min: 0.1, Max: 10)     |
| 216 | creatinine_d11 | Creatinine day 11            | text (number, Min: 0.1, Max: 8)      |
| 217 | creatinine_d12 | Creatinine day 12            | text (number, Min: 0.1, Max: 8)      |
| 218 | creatinine_d13 | Creatinine day 13            | text (number, Min: 0.1, Max: 8)      |

|     |                |                       |                                    |
|-----|----------------|-----------------------|------------------------------------|
| 219 | creatinine_d14 | Creatinine day 14     | text (number, Min: 0.1, Max: 8)    |
| 220 | albumin_d1     | Albumin day 1         | text (number, Min: 1.5, Max: 6)    |
| 221 | albumin_d2     | Albumin day 2         | text (number, Min: 1.5, Max: 6)    |
| 222 | albumin_d3     | Albumin day 3         | text (number, Min: 1.5, Max: 6)    |
| 223 | albumin_d4     | Albumin day 4         | text (number, Min: 1.5, Max: 6)    |
| 224 | albumin_d5     | Albumin day 5         | text (number, Min: 1.5, Max: 6)    |
| 225 | albumin_d6     | Albumin day 6         | text (number, Min: 1.5, Max: 6)    |
| 226 | albumin_d7     | Albumin day 7         | text (number, Min: 1.5, Max: 6)    |
| 227 | albumin_d8     | Albumin day 8         | text (number, Min: 1.5, Max: 6)    |
| 228 | albumin_d9     | Albumin day 9         | text (number, Min: 1.5, Max: 6)    |
| 229 | albumin_d10    | Albumin day 10        | text (number, Min: 1.5, Max: 6)    |
| 230 | albumin_d11    | Albumin day 11        | text (number, Min: 1.5, Max: 6)    |
| 231 | albumin_d12    | Albumin day 12        | text (number, Min: 1.5, Max: 6)    |
| 232 | albumin_d13    | Albumin day 13        | text (number, Min: 1.5, Max: 6)    |
| 233 | albumin_d14    | Albumin day 14        | text (number, Min: 1.5, Max: 6)    |
| 234 | ast_d1         | AST day 1             | text (integer, Min: 0, Max: 20000) |
| 235 | ast_d2         | AST day 2             | text (integer, Min: 0, Max: 20000) |
| 236 | ast_d3         | AST day 3             | text (integer, Min: 0, Max: 20000) |
| 237 | ast_d4         | AST day 4             | text (integer, Min: 0, Max: 20000) |
| 238 | ast_d5         | AST day 5             | text (integer, Min: 0, Max: 20000) |
| 239 | ast_d6         | AST day 6             | text (integer, Min: 0, Max: 20000) |
| 240 | ast_d7         | AST day 7             | text (integer, Min: 0, Max: 20000) |
| 241 | ast_d8         | AST day 8             | text (integer, Min: 0, Max: 20000) |
| 242 | ast_d9         | AST day 9             | text (integer, Min: 0, Max: 20000) |
| 243 | ast_d10        | AST day 10            | text (integer, Min: 0, Max: 20000) |
| 244 | ast_d11        | AST day 11            | text (integer, Min: 0, Max: 20000) |
| 245 | ast_d12        | AST day 12            | text (integer, Min: 0, Max: 20000) |
| 246 | ast_d13        | AST day 13            | text (integer, Min: 0, Max: 20000) |
| 247 | ast_d14        | AST day 14            | text (integer, Min: 0, Max: 20000) |
| 248 | alt_d1         | ALT day 1             | text (integer, Min: 0, Max: 20000) |
| 249 | alt_d2         | ALT day 2             | text (integer, Min: 0, Max: 20000) |
| 250 | alt_d3         | ALT day 3             | text (integer, Min: 0, Max: 20000) |
| 251 | alt_d4         | ALT day 4             | text (integer, Min: 0, Max: 20000) |
| 252 | alt_d5         | ALT day 5             | text (integer, Min: 0, Max: 20000) |
| 253 | alt_d6         | ALT day 6             | text (integer, Min: 0, Max: 20000) |
| 254 | alt_d7         | ALT day 7             | text (integer, Min: 0, Max: 20000) |
| 255 | alt_d8         | ALT day 8             | text (integer, Min: 0, Max: 20000) |
| 256 | alt_d9         | ALT day 9             | text (integer, Min: 0, Max: 20000) |
| 257 | alt_d10        | ALT day 10            | text (integer, Min: 0, Max: 20000) |
| 258 | alt_d11        | ALT day 11            | text (integer, Min: 0, Max: 20000) |
| 259 | alt_d12        | ALT day 12            | text (integer, Min: 0, Max: 20000) |
| 260 | alt_d13        | ALT day 13            | text (integer, Min: 0, Max: 20000) |
| 261 | alt_d14        | ALT day 14            | text (integer, Min: 0, Max: 20000) |
| 262 | bilirubin_d1   | Total bilirubin day 1 | text (number, Min: 0.1, Max: 30)   |
| 263 | bilirubin_d2   | Total bilirubin day 2 | text (number, Min: 0.1, Max: 30)   |
| 264 | bilirubin_d3   | Total bilirubin day 3 | text (number, Min: 0.1, Max: 30)   |
| 265 | bilirubin_d4   | Total bilirubin day 4 | text (number, Min: 0.1, Max: 30)   |
| 266 | bilirubin_d5   | Total bilirubin day 5 | text (number, Min: 0.1, Max: 30)   |



|     |               |                        |                                   |
|-----|---------------|------------------------|-----------------------------------|
| 267 | bilirubin_d6  | Total bilirubin day 6  | text (number, Min: 0.1, Max: 30)  |
| 268 | bilirubin_d7  | Total bilirubin day 7  | text (number, Min: 0.1, Max: 30)  |
| 269 | bilirubin_d8  | Total bilirubin day 8  | text (number, Min: 0.1, Max: 30)  |
| 270 | bilirubin_d9  | Total bilirubin day 9  | text (number, Min: 0.1, Max: 30)  |
| 271 | bilirubin_d10 | Total bilirubin day 10 | text (number, Min: 0.1, Max: 30)  |
| 272 | bilirubin_d11 | Total bilirubin day 11 | text (number, Min: 0.1, Max: 30)  |
| 273 | bilirubin_d12 | Total bilirubin day 12 | text (number, Min: 0.1, Max: 30)  |
| 274 | bilirubin_d13 | Total bilirubin day 13 | text (number, Min: 0.1, Max: 30)  |
| 275 | bilirubin_d14 | Total bilirubin day 14 | text (number, Min: 0.1, Max: 30)  |
| 276 | lactate_d1    | Lactate day 1          | text (number, Min: 0.1, Max: 30)  |
| 277 | lactate_d2    | Lactate day 2          | text (number, Min: 0.1, Max: 30)  |
| 278 | lactate_d3    | Lactate day 3          | text (number, Min: 0.1, Max: 30)  |
| 279 | lactate_d4    | Lactate day 4          | text (number, Min: 0.1, Max: 30)  |
| 280 | lactate_d5    | Lactate day 5          | text (number, Min: 0.1, Max: 30)  |
| 281 | lactate_d6    | Lactate day 6          | text (number, Min: 0.1, Max: 30)  |
| 282 | lactate_d7    | Lactate day 7          | text (number, Min: 0.1, Max: 30)  |
| 283 | lactate_d8    | Lactate day 8          | text (number, Min: 0.1, Max: 30)  |
| 284 | lactate_d9    | Lactate day 9          | text (number, Min: 0.1, Max: 30)  |
| 285 | lactate_d10   | Lactate day 10         | text (number, Min: 0.1, Max: 30)  |
| 286 | lactate_d11   | Lactate day 11         | text (number, Min: 0.1, Max: 30)  |
| 287 | lactate_d12   | Lactate day 12         | text (number, Min: 0.1, Max: 30)  |
| 288 | lactate_d13   | Lactate day 13         | text (number, Min: 0.1, Max: 30)  |
| 289 | lactate_d14   | Lactate day 14         | text (number, Min: 0.1, Max: 30)  |
| 290 | crp_d1        | CRP day 1              | text (number, Min: 0, Max: 1000)  |
| 291 | crp_d2        | CRP day 2              | text (number, Min: 0, Max: 10000) |
| 292 | crp_d3        | CRP day 3              | text (number, Min: 0, Max: 1000)  |
| 293 | crp_d4        | CRP day 4              | text (number, Min: 0, Max: 1000)  |
| 294 | crp_d5        | CRP day 5              | text (number, Min: 0, Max: 1000)  |
| 295 | crp_d6        | CRP day 6              | text (number, Min: 0, Max: 1000)  |
| 296 | crp_d7        | CRP day 7              | text (number, Min: 0, Max: 1000)  |
| 297 | crp_d8        | CRP day 8              | text (number, Min: 0, Max: 1000)  |
| 298 | crp_d9        | CRP day 9              | text (number, Min: 0, Max: 1000)  |
| 299 | crp_d10       | CRP day 10             | text (number, Min: 0, Max: 1000)  |
| 300 | crp_d11       | CRP day 11             | text (number, Min: 0, Max: 1000)  |
| 301 | crp_d12       | CRP day 12             | text (number, Min: 0, Max: 1000)  |
| 302 | crp_d13       | CRP day 13             | text (number, Min: 0, Max: 1000)  |
| 303 | crp_d14       | CRP day 14             | text (number, Min: 0, Max: 1000)  |
| 304 | il_6_d1       | IL-6 day 1             | text (number, Min: 0, Max: 10000) |
| 305 | il_6_d2       | IL-6 day 2             | text (number, Min: 0, Max: 10000) |
| 306 | il_6_d3       | IL-6 day 3             | text (number, Min: 0, Max: 10000) |
| 307 | il_6_d4       | IL-6 day 4             | text (number, Min: 0, Max: 10000) |
| 308 | il_6_d5       | IL-6 day 5             | text (number, Min: 0, Max: 10000) |
| 309 | il_6_d6       | IL-6 day 6             | text (number, Min: 0, Max: 10000) |
| 310 | il_6_d7       | IL-6 day 7             | text (number, Min: 0, Max: 10000) |
| 311 | il_6_d8       | IL-6 day 8             | text (number, Min: 0, Max: 10000) |
| 312 | il_6_d9       | IL-6 day 9             | text (number, Min: 0, Max: 10000) |
| 313 | il_6_d10      | IL-6 day 10            | text (number, Min: 0, Max: 10000) |
| 314 | il_6_d11      | IL-6 day 11            | text (number, Min: 0, Max: 10000) |

|     |                 |                    |                                    |
|-----|-----------------|--------------------|------------------------------------|
| 315 | il_6_d12        | IL-6 day 12        | text (number, Min: 0, Max: 10000)  |
| 316 | il_6_d13        | IL-6 day 13        | text (number, Min: 0, Max: 10000)  |
| 317 | il_6_d14        | IL-6 day 14        | text (number, Min: 0, Max: 10000)  |
| 318 | arterial_ph_d1  | Arterial pH day 1  | text (number, Min: 6.8, Max: 7.6)  |
| 319 | arterial_ph_d2  | Arterial pH day 2  | text (number, Min: 6.8, Max: 7.6)  |
| 320 | arterial_ph_d3  | Arterial pH day 3  | text (number, Min: 6.8, Max: 7.6)  |
| 321 | arterial_ph_d4  | Arterial pH day 4  | text (number, Min: 6.8, Max: 7.6)  |
| 322 | arterial_ph_d5  | Arterial pH day 5  | text (number, Min: 6.8, Max: 7.6)  |
| 323 | arterial_ph_d6  | Arterial pH day 6  | text (number, Min: 6.8, Max: 7.6)  |
| 324 | arterial_ph_d7  | Arterial pH day 7  | text (number, Min: 6.8, Max: 7.6)  |
| 325 | arterial_ph_d8  | Arterial pH day 8  | text (number, Min: 6.8, Max: 7.6)  |
| 326 | arterial_ph_d9  | Arterial pH day 9  | text (number, Min: 6.8, Max: 7.6)  |
| 327 | arterial_ph_d10 | Arterial pH day 10 | text (number, Min: 6.8, Max: 7.6)  |
| 328 | arterial_ph_d11 | Arterial pH day 11 | text (number, Min: 6.8, Max: 7.6)  |
| 329 | arterial_ph_d12 | Arterial pH day 12 | text (number, Min: 6.8, Max: 7.6)  |
| 330 | arterial_ph_d13 | Arterial pH day 13 | text (number, Min: 6.8, Max: 7.6)  |
| 331 | arterial_ph_d14 | Arterial pH day 14 | text (number, Min: 6.8, Max: 7.6)  |
| 332 | fibrinogen_d1   | Fibrinogen day 1   | text (integer, Min: 0, Max: 10000) |
| 333 | fibrinogen_d2   | Fibrinogen day 2   | text (integer, Min: 0, Max: 10000) |
| 334 | fibrinogen_d3   | Fibrinogen day 3   | text (integer, Min: 0, Max: 10000) |
| 335 | fibrinogen_d4   | Fibrinogen day 4   | text (number, Min: 0, Max: 10000)  |
| 336 | fibrinogen_d5   | Fibrinogen day 5   | text (integer, Min: 0, Max: 10000) |
| 337 | fibrinogen_d6   | Fibrinogen day 6   | text (integer, Min: 0, Max: 10000) |
| 338 | fibrinogen_d7   | Fibrinogen day 7   | text (integer, Min: 0, Max: 10000) |
| 339 | fibrinogen_d8   | Fibrinogen day 8   | text (integer, Min: 0, Max: 10000) |
| 340 | fibrinogen_d9   | Fibrinogen day 9   | text (integer, Min: 0, Max: 10000) |
| 341 | fibrinogen_d10  | Fibrinogen day 10  | text (integer, Min: 0, Max: 10000) |
| 342 | fibrinogen_d11  | Fibrinogen day 11  | text (integer, Min: 0, Max: 10000) |
| 343 | fibrinogen_d12  | Fibrinogen day 12  | text (integer, Min: 0, Max: 10000) |
| 344 | fibrinogen_d13  | Fibrinogen day 13  | text (integer, Min: 0, Max: 10000) |
| 345 | fibrinogen_d14  | Fibrinogen day 14  | text (integer, Min: 0, Max: 10000) |
| 346 | d_dimer_d1      | D dimer day 1      | text (number, Min: 0, Max: 20000)  |
| 347 | d_dimer_d2      | D dimer day 2      | text (number, Min: 0, Max: 20000)  |
| 348 | d_dimer_d3      | D dimer day 3      | text (number, Min: 0, Max: 20000)  |
| 349 | d_dimer_d4      | D dimer day 4      | text (number, Min: 0, Max: 20000)  |
| 350 | d_dimer_d5      | D dimer day 5      | text (number, Min: 0, Max: 20000)  |
| 351 | d_dimer_d6      | D dimer day 6      | text (number, Min: 0, Max: 20000)  |
| 352 | d_dimer_d7      | D dimer day 7      | text (number, Min: 0, Max: 20000)  |
| 353 | d_dimer_d8      | D dimer day 8      | text (number, Min: 0, Max: 20000)  |
| 354 | d_dimer_d9      | D dimer day 9      | text (number, Min: 0, Max: 20000)  |
| 355 | d_dimer_d10     | D dimer day 10     | text (number, Min: 0, Max: 20000)  |
| 356 | d_dimer_d11     | D dimer day 11     | text (number, Min: 0, Max: 20000)  |
| 357 | d_dimer_d12     | D dimer day 12     | text (number, Min: 0, Max: 20000)  |
| 358 | d_dimer_d13     | D dimer day 13     | text (number, Min: 0, Max: 20000)  |
| 359 | d_dimer_d14     | D dimer day 14     | text (number, Min: 0, Max: 20000)  |
| 360 | ferritin_d1     | Ferritin Day 1     | text (number, Min: 0, Max: 500000) |
| 361 | ferritin_d2     | Ferritin Day 2     | text (number, Min: 0, Max: 500000) |
| 362 | ferritin_d3     | Ferritin Day 3     | text (number, Min: 0, Max: 500000) |

|     |              |                   |                                    |
|-----|--------------|-------------------|------------------------------------|
| 363 | ferritin_d4  | Ferritin Day 4    | text (number, Min: 0, Max: 500000) |
| 364 | ferritin_d5  | Ferritin Day 5    | text (number, Min: 0, Max: 500000) |
| 365 | ferritin_d6  | Ferritin Day 6    | text (number, Min: 0, Max: 500000) |
| 366 | ferritin_d7  | Ferritin Day 7    | text (number, Min: 0, Max: 500000) |
| 367 | ferritin_d8  | Ferritin Day 8    | text (number, Min: 0, Max: 500000) |
| 368 | ferritin_d9  | Ferritin Day 9    | text (number, Min: 0, Max: 500000) |
| 369 | ferritin_d10 | Ferritin Day 10   | text (number, Min: 0, Max: 500000) |
| 370 | ferritin_d11 | Ferritin Day 11   | text (number, Min: 0, Max: 500000) |
| 371 | ferritin_d12 | Ferritin Day 12   | text (number, Min: 0, Max: 500000) |
| 372 | ferritin_d13 | Ferritin Day 13   | text (number, Min: 0, Max: 500000) |
| 373 | ferritin_d14 | Ferritin Day 14   | text (number, Min: 0, Max: 500000) |
| 374 | trop_t_d1    | Troponin T day 1  | text (number, Min: 0, Max: 30000)  |
| 375 | trop_t_d2    | Troponin T day 2  | text (number, Min: 0, Max: 30000)  |
| 376 | trop_t_d3    | Troponin T day 3  | text (number, Min: 0, Max: 30000)  |
| 377 | trop_t_d4    | Troponin T day 4  | text (number, Min: 0, Max: 30000)  |
| 378 | trop_t_d5    | Troponin T day 5  | text (number, Min: 0, Max: 30000)  |
| 379 | trop_t_d6    | Troponin T day 6  | text (number, Min: 0, Max: 30000)  |
| 380 | trop_t_d7    | Troponin T day 7  | text (number, Min: 0, Max: 30000)  |
| 381 | trop_t_d8    | Troponin T day 8  | text (number, Min: 0, Max: 30000)  |
| 382 | trop_t_d9    | Troponin T day 9  | text (number, Min: 0, Max: 30000)  |
| 383 | trop_t_d10   | Troponin T day 10 | text (number, Min: 0, Max: 30000)  |
| 384 | trop_t_d11   | Troponin T day 11 | text (number, Min: 0, Max: 30000)  |
| 385 | trop_t_d12   | Troponin T day 12 | text (number, Min: 0, Max: 30000)  |
| 386 | trop_t_d13   | Troponin T day 13 | text (number, Min: 0, Max: 30000)  |
| 387 | trop_t_d14   | Troponin T day 14 | text (number, Min: 0, Max: 30000)  |
| 388 | trop_i_d1    | Troponin I day 1  | text (number, Min: 0, Max: 30000)  |
| 389 | trop_i_d2    | Troponin I day 2  | text (number, Min: 0, Max: 30000)  |
| 390 | trop_i_d3    | Troponin I day 3  | text (number, Min: 0, Max: 30000)  |
| 391 | trop_i_d4    | Troponin I day 4  | text (number, Min: 0, Max: 30000)  |
| 392 | trop_i_d5    | Troponin I day 5  | text (number, Min: 0, Max: 30000)  |
| 393 | trop_i_d6    | Troponin I day 6  | text (number, Min: 0, Max: 30000)  |
| 394 | trop_i_d7    | Troponin I day 7  | text (number, Min: 0, Max: 30000)  |
| 395 | trop_i_d8    | Troponin I day 8  | text (number, Min: 0, Max: 30000)  |
| 396 | trop_i_d9    | Troponin I day 9  | text (number, Min: 0, Max: 30000)  |
| 397 | trop_i_d10   | Troponin I day 10 | text (number, Min: 0, Max: 30000)  |
| 398 | trop_i_d11   | Troponin I day 11 | text (number, Min: 0, Max: 30000)  |
| 399 | trop_i_d12   | Troponin I day 12 | text (number, Min: 0, Max: 30000)  |
| 400 | trop_i_d13   | Troponin I day 13 | text (number, Min: 0, Max: 30000)  |
| 401 | trop_i_d14   | Troponin I day 14 | text (number, Min: 0, Max: 30000)  |
| 402 | pao2_d1      | PaO2 day 1*       | text (number, Min: 30, Max: 500)   |
| 403 | pao2_d2      | PaO2 day 2*       | text (number, Min: 30, Max: 500)   |
| 404 | pao2_d3      | PaO2 day 3*       | text (number, Min: 30, Max: 500)   |
| 405 | pao2_d4      | PaO2 day 4*       | text (number, Min: 30, Max: 500)   |
| 406 | pao2_d5      | PaO2 day 5*       | text (number, Min: 30, Max: 500)   |
| 407 | pao2_d6      | PaO2 day 6*       | text (number, Min: 30, Max: 500)   |
| 408 | pao2_d7      | PaO2 day 7*       | text (number, Min: 30, Max: 500)   |
| 409 | pao2_d8      | PaO2 day 8*       | text (number, Min: 30, Max: 500)   |
| 410 | pao2_d9      | PaO2 day 9*       | text (number, Min: 30, Max: 500)   |

|     |           |                                   |                                    |
|-----|-----------|-----------------------------------|------------------------------------|
| 411 | pao2_d10  | PaO2 day 10*                      | text (number, Min: 30, Max: 500)   |
| 412 | pao2_d11  | PaO2 day 11*                      | text (number, Min: 30, Max: 500)   |
| 413 | pao2_d12  | PaO2 day 12*                      | text (number, Min: 30, Max: 500)   |
| 414 | pao2_d13  | PaO2 day 13*                      | text (number, Min: 30, Max: 500)   |
| 415 | pao2_d14  | PaO2 day 14*                      | text (number, Min: 30, Max: 500)   |
| 416 | fio2_d1   | FiO2 day 1                        | text (number, Min: 0, Max: 100)    |
| 417 | fio2_d2   | FiO2 day 2                        | text (number, Min: 0, Max: 100)    |
| 418 | fio2_d3   | FiO2 day 3                        | text (number, Min: 0, Max: 100)    |
| 419 | fio2_d4   | FiO2 day 4                        | text (number, Min: 0, Max: 100)    |
| 420 | fio2_d5   | FiO2 day 5                        | text (number, Min: 0, Max: 100)    |
| 421 | fio2_d6   | FiO2 day 6                        | text (number, Min: 0, Max: 100)    |
| 422 | fio2_d7   | FiO2 day 7                        | text (number, Min: 0, Max: 100)    |
| 423 | fio2_d8   | FiO2 day 8                        | text (number, Min: 0, Max: 100)    |
| 424 | fio2_d9   | FiO2 day 9                        | text (number, Min: 0, Max: 100)    |
| 425 | fio2_d10  | FiO2 day 10                       | text (number, Min: 0, Max: 100)    |
| 426 | fio2_d11  | FiO2 day 11                       | text (number, Min: 0, Max: 100)    |
| 427 | fio2_d12  | FiO2 day 12                       | text (number, Min: 0, Max: 100)    |
| 428 | fio2_d13  | FiO2 day 13                       | text (number, Min: 0, Max: 100)    |
| 429 | fio2_d14  | FiO2 day 14                       | text (number, Min: 0, Max: 100)    |
| 430 | peep_d1   | PEEP day 1                        | text (integer, Min: 0, Max: 40)    |
| 431 | peep_d2   | PEEP day 2                        | text (integer, Min: 0, Max: 40)    |
| 432 | peep_d3   | PEEP day 3                        | text (integer, Min: 0, Max: 40)    |
| 433 | peep_d4   | PEEP day 4                        | text (integer, Min: 0, Max: 40)    |
| 434 | peep_d5   | PEEP day 5                        | text (integer, Min: 0, Max: 40)    |
| 435 | peep_d6   | PEEP day 6                        | text (integer, Min: 0, Max: 40)    |
| 436 | peep_d7   | PEEP day 7                        | text (integer, Min: 0, Max: 40)    |
| 437 | peep_d8   | PEEP day 8                        | text (integer, Min: 0, Max: 40)    |
| 438 | peep_d9   | PEEP day 9                        | text (integer, Min: 0, Max: 40)    |
| 439 | peep_d10  | PEEP day 10                       | text (integer, Min: 0, Max: 40)    |
| 440 | peep_d11  | PEEP day 11                       | text (integer, Min: 0, Max: 40)    |
| 441 | peep_d12  | PEEP day 12                       | text (integer, Min: 0, Max: 40)    |
| 442 | peep_d13  | PEEP day 13                       | text (integer, Min: 0, Max: 40)    |
| 443 | peep_d14  | PEEP day 14                       | text (integer, Min: 0, Max: 40)    |
| 444 | uop_d1    | 24h Urine Output Day 1            | text (integer, Min: 0, Max: 12000) |
| 445 | uop_d2    | 24h Urine Output Day 2            | text (integer, Min: 0, Max: 12000) |
| 446 | uop_d3    | 24h Urine Output Day 3            | text (integer, Min: 0, Max: 12000) |
| 447 | uop_d4    | 24h Urine Output Day 4            | text (integer, Min: 0, Max: 12000) |
| 448 | uop_d5    | 24h Urine Output Day 5            | text (integer, Min: 0, Max: 12000) |
| 449 | uop_d6    | 24h Urine Output Day 6            | text (integer, Min: 0, Max: 12000) |
| 450 | uop_d7    | 24h Urine Output Day 7            | text (integer, Min: 0, Max: 12000) |
| 451 | uop_d8    | 24h Urine Output Day 8            | text (integer, Min: 0, Max: 12000) |
| 452 | uop_d9    | 24h Urine Output Day 9            | text (integer, Min: 0, Max: 12000) |
| 453 | uop_d10   | 24h Urine Output Day 10           | text (integer, Min: 0, Max: 12000) |
| 454 | uop_d11   | 24h Urine Output Day 11           | text (integer, Min: 0, Max: 12000) |
| 455 | uop_d12   | 24h Urine Output Day 12           | text (integer, Min: 0, Max: 12000) |
| 456 | uop_d13   | 24h Urine Output Day 13           | text (integer, Min: 0, Max: 12000) |
| 457 | uop_d14   | 24h Urine Output Day 14           | text (integer, Min: 0, Max: 12000) |
| 458 | max_vi_d1 | Max #vasopressors/inotropes day 1 | text (integer, Min: 0, Max: 6)     |

|     |                                                               |                                                 |                                                                                                                                                                     |   |            |   |            |   |          |
|-----|---------------------------------------------------------------|-------------------------------------------------|---------------------------------------------------------------------------------------------------------------------------------------------------------------------|---|------------|---|------------|---|----------|
| 459 | max_vi_d2                                                     | Max #vasopressors/inotropes day 2               | text (integer, Min: 0, Max: 6)                                                                                                                                      |   |            |   |            |   |          |
| 460 | max_vi_d3                                                     | Max #vasopressors/inotropes day 3               | text (integer, Min: 0, Max: 6)                                                                                                                                      |   |            |   |            |   |          |
| 461 | max_vi_d4                                                     | Max #vasopressors/inotropes day 4               | text (integer, Min: 0, Max: 6)                                                                                                                                      |   |            |   |            |   |          |
| 462 | max_vi_d5                                                     | Max #vasopressors/inotropes day 5               | text (integer, Min: 0, Max: 6)                                                                                                                                      |   |            |   |            |   |          |
| 463 | max_vi_d6                                                     | Max #vasopressors/inotropes day 6               | text (integer, Min: 0, Max: 6)                                                                                                                                      |   |            |   |            |   |          |
| 464 | max_vi_d7                                                     | Max #vasopressors/inotropes day 7               | text (integer, Min: 0, Max: 6)                                                                                                                                      |   |            |   |            |   |          |
| 465 | max_vi_d8                                                     | Max #vasopressors/inotropes day 8               | text (integer, Min: 0, Max: 6)                                                                                                                                      |   |            |   |            |   |          |
| 466 | max_vi_d9                                                     | Max #vasopressors/inotropes day 9               | text (integer, Min: 0, Max: 6)                                                                                                                                      |   |            |   |            |   |          |
| 467 | max_vi_d10                                                    | Max #vasopressors/inotropes day 10              | text (integer, Min: 0, Max: 6)                                                                                                                                      |   |            |   |            |   |          |
| 468 | max_vi_d11                                                    | Max #vasopressors/inotropes day 11              | text (integer, Min: 0, Max: 6)                                                                                                                                      |   |            |   |            |   |          |
| 469 | max_vi_d12                                                    | Max #vasopressors/inotropes day 12              | text (integer, Min: 0, Max: 6)                                                                                                                                      |   |            |   |            |   |          |
| 470 | max_vi_d13                                                    | Max #vasopressors/inotropes day 13              | text (integer, Min: 0, Max: 6)                                                                                                                                      |   |            |   |            |   |          |
| 471 | max_vi_d14                                                    | Max #vasopressors/inotropes day 14              | text (integer, Min: 0, Max: 6)                                                                                                                                      |   |            |   |            |   |          |
| 472 | notes_lab                                                     | Additional Notes (if any)                       | notes                                                                                                                                                               |   |            |   |            |   |          |
| 473 | longitudinal_data_on_labs_and_physiologic_parameters_complete | Section Header: <i>Form Status</i><br>Complete? | dropdown<br><table border="1"> <tr> <td>0</td> <td>Incomplete</td> </tr> <tr> <td>1</td> <td>Unverified</td> </tr> <tr> <td>2</td> <td>Complete</td> </tr> </table> | 0 | Incomplete | 1 | Unverified | 2 | Complete |
| 0   | Incomplete                                                    |                                                 |                                                                                                                                                                     |   |            |   |            |   |          |
| 1   | Unverified                                                    |                                                 |                                                                                                                                                                     |   |            |   |            |   |          |
| 2   | Complete                                                      |                                                 |                                                                                                                                                                     |   |            |   |            |   |          |

Instrument: **Acute Organ Injury in the First 14 Days Following ICU Admission** (acute\_organ\_injury\_in\_the\_first\_14\_days\_following)

[^ Collapse](#)

|     |                                                               |                                                                                                                                                                                                                                                                                                                                                                                                                                                                                                                                                         |                                                                                                                                                                                                                                                                                                                                                                                                                      |   |               |                             |               |               |                               |   |               |                          |   |               |                   |
|-----|---------------------------------------------------------------|---------------------------------------------------------------------------------------------------------------------------------------------------------------------------------------------------------------------------------------------------------------------------------------------------------------------------------------------------------------------------------------------------------------------------------------------------------------------------------------------------------------------------------------------------------|----------------------------------------------------------------------------------------------------------------------------------------------------------------------------------------------------------------------------------------------------------------------------------------------------------------------------------------------------------------------------------------------------------------------|---|---------------|-----------------------------|---------------|---------------|-------------------------------|---|---------------|--------------------------|---|---------------|-------------------|
| 474 | ards                                                          | Section Header: <i>The questions below refer to the first 14 days following ICU admission. Even if the patient was in the ICU for less than 14 days and was transferred to the hospital floor, continue to enter data for the full 14 days or until discharged from the hospital (whichever occurs first)Each of the acute organ injuries in this section is defined based on clinical suspicion by the treating provider(s)</i><br><br>Did ARDS occur within the first 14 days following ICU admission?ARDS defined as per chart review/progress notes | yesno, Required<br><table border="1"> <tr> <td>1</td> <td>Yes</td> </tr> <tr> <td>0</td> <td>No</td> </tr> </table>                                                                                                                                                                                                                                                                                                  | 1 | Yes           | 0                           | No            |               |                               |   |               |                          |   |               |                   |
| 1   | Yes                                                           |                                                                                                                                                                                                                                                                                                                                                                                                                                                                                                                                                         |                                                                                                                                                                                                                                                                                                                                                                                                                      |   |               |                             |               |               |                               |   |               |                          |   |               |                   |
| 0   | No                                                            |                                                                                                                                                                                                                                                                                                                                                                                                                                                                                                                                                         |                                                                                                                                                                                                                                                                                                                                                                                                                      |   |               |                             |               |               |                               |   |               |                          |   |               |                   |
| 475 | date_ards<br>Show the field ONLY if: [ards] = '1'             | Date ARDS was first confirmed/suspectedDo not enter any dates prior to ICU Day1; if ARDS started prior to ICU Day1 and was still present on ICU Day1, enter the ICU Day1 date                                                                                                                                                                                                                                                                                                                                                                           | text (date_mdy), Required                                                                                                                                                                                                                                                                                                                                                                                            |   |               |                             |               |               |                               |   |               |                          |   |               |                   |
| 476 | new_chf                                                       | New congestive heart failure (CHF) in the first 14 days following ICU admission?                                                                                                                                                                                                                                                                                                                                                                                                                                                                        | radio, Required<br><table border="1"> <tr> <td>1</td> <td>Yes</td> </tr> <tr> <td>2</td> <td>No</td> </tr> <tr> <td>3</td> <td>N/A (CHF present at baseline)</td> </tr> </table>                                                                                                                                                                                                                                     | 1 | Yes           | 2                           | No            | 3             | N/A (CHF present at baseline) |   |               |                          |   |               |                   |
| 1   | Yes                                                           |                                                                                                                                                                                                                                                                                                                                                                                                                                                                                                                                                         |                                                                                                                                                                                                                                                                                                                                                                                                                      |   |               |                             |               |               |                               |   |               |                          |   |               |                   |
| 2   | No                                                            |                                                                                                                                                                                                                                                                                                                                                                                                                                                                                                                                                         |                                                                                                                                                                                                                                                                                                                                                                                                                      |   |               |                             |               |               |                               |   |               |                          |   |               |                   |
| 3   | N/A (CHF present at baseline)                                 |                                                                                                                                                                                                                                                                                                                                                                                                                                                                                                                                                         |                                                                                                                                                                                                                                                                                                                                                                                                                      |   |               |                             |               |               |                               |   |               |                          |   |               |                   |
| 477 | ejection_fraction<br>Show the field ONLY if: [new_chf] = '1'  | Enter the left ventricular ejection fraction at the time of the new heart failure-Enter as an integer (0-100) and without % sign-If unavailable, enter, "N/A"                                                                                                                                                                                                                                                                                                                                                                                           | text, Required                                                                                                                                                                                                                                                                                                                                                                                                       |   |               |                             |               |               |                               |   |               |                          |   |               |                   |
| 478 | date_chf<br>Show the field ONLY if: [new_chf] = '1'           | Date CHF was first confirmed/suspectedDo not enter any dates prior to ICU Day1; if CHF started prior to ICU Day1 and was still present on ICU Day1, enter the ICU Day1 date                                                                                                                                                                                                                                                                                                                                                                             | text (date_mdy), Required                                                                                                                                                                                                                                                                                                                                                                                            |   |               |                             |               |               |                               |   |               |                          |   |               |                   |
| 479 | arrhythmia                                                    | Arrhythmia during the first 14 days following ICU admission?Do not enter any dates prior to ICU Day1; if arrhythmia started prior to ICU Day1 and was still present on ICU Day1, enter the ICU Day1 date                                                                                                                                                                                                                                                                                                                                                | checkbox, Required<br><table border="1"> <tr> <td>1</td> <td>arrhythmia__1</td> <td>Atrial fibrillation/flutter</td> </tr> <tr> <td>2</td> <td>arrhythmia__2</td> <td>Ventricular tachycardia (VT)</td> </tr> <tr> <td>3</td> <td>arrhythmia__3</td> <td>Ventricular fibrillation</td> </tr> <tr> <td>4</td> <td>arrhythmia__4</td> <td>None of the above</td> </tr> </table><br>Field Annotation: @NONEOFTHEABOVE=4 | 1 | arrhythmia__1 | Atrial fibrillation/flutter | 2             | arrhythmia__2 | Ventricular tachycardia (VT)  | 3 | arrhythmia__3 | Ventricular fibrillation | 4 | arrhythmia__4 | None of the above |
| 1   | arrhythmia__1                                                 | Atrial fibrillation/flutter                                                                                                                                                                                                                                                                                                                                                                                                                                                                                                                             |                                                                                                                                                                                                                                                                                                                                                                                                                      |   |               |                             |               |               |                               |   |               |                          |   |               |                   |
| 2   | arrhythmia__2                                                 | Ventricular tachycardia (VT)                                                                                                                                                                                                                                                                                                                                                                                                                                                                                                                            |                                                                                                                                                                                                                                                                                                                                                                                                                      |   |               |                             |               |               |                               |   |               |                          |   |               |                   |
| 3   | arrhythmia__3                                                 | Ventricular fibrillation                                                                                                                                                                                                                                                                                                                                                                                                                                                                                                                                |                                                                                                                                                                                                                                                                                                                                                                                                                      |   |               |                             |               |               |                               |   |               |                          |   |               |                   |
| 4   | arrhythmia__4                                                 | None of the above                                                                                                                                                                                                                                                                                                                                                                                                                                                                                                                                       |                                                                                                                                                                                                                                                                                                                                                                                                                      |   |               |                             |               |               |                               |   |               |                          |   |               |                   |
| 480 | sustained_vt<br>Show the field ONLY if: [arrhythmia(2)] = '1' | Sustained or non-sustained VT?Sustained is defined as requiring shocks or anti-arrhythmic therapy                                                                                                                                                                                                                                                                                                                                                                                                                                                       | radio, Required<br><table border="1"> <tr> <td>1</td> <td>Sustained</td> </tr> <tr> <td>2</td> <td>Non-sustained</td> </tr> </table>                                                                                                                                                                                                                                                                                 | 1 | Sustained     | 2                           | Non-sustained |               |                               |   |               |                          |   |               |                   |
| 1   | Sustained                                                     |                                                                                                                                                                                                                                                                                                                                                                                                                                                                                                                                                         |                                                                                                                                                                                                                                                                                                                                                                                                                      |   |               |                             |               |               |                               |   |               |                          |   |               |                   |
| 2   | Non-sustained                                                 |                                                                                                                                                                                                                                                                                                                                                                                                                                                                                                                                                         |                                                                                                                                                                                                                                                                                                                                                                                                                      |   |               |                             |               |               |                               |   |               |                          |   |               |                   |

|     |                                                                                                               |                                                                                                                                                                                                                                                                                                                                                                                                                                                                                                                                                  |                                                                                                                                                                                                                                                                                                                                                                                                                                                                                                                                                                                                                             |   |                          |                |                                        |                  |                                     |   |                  |             |               |                  |           |   |                  |            |   |                  |           |   |                  |          |   |                  |                                              |
|-----|---------------------------------------------------------------------------------------------------------------|--------------------------------------------------------------------------------------------------------------------------------------------------------------------------------------------------------------------------------------------------------------------------------------------------------------------------------------------------------------------------------------------------------------------------------------------------------------------------------------------------------------------------------------------------|-----------------------------------------------------------------------------------------------------------------------------------------------------------------------------------------------------------------------------------------------------------------------------------------------------------------------------------------------------------------------------------------------------------------------------------------------------------------------------------------------------------------------------------------------------------------------------------------------------------------------------|---|--------------------------|----------------|----------------------------------------|------------------|-------------------------------------|---|------------------|-------------|---------------|------------------|-----------|---|------------------|------------|---|------------------|-----------|---|------------------|----------|---|------------------|----------------------------------------------|
| 481 | date_afib<br>Show the field ONLY if:<br>[arrhythmia(1)] = '1'                                                 | Date atrial fibrillation/flutter first developedDo not enter any dates prior to ICU Day1; if atrial fibrillation/flutter started prior to ICU Day1 and was still present on ICU Day1, enter the ICU Day1 date                                                                                                                                                                                                                                                                                                                                    | text (date_mdy), Required                                                                                                                                                                                                                                                                                                                                                                                                                                                                                                                                                                                                   |   |                          |                |                                        |                  |                                     |   |                  |             |               |                  |           |   |                  |            |   |                  |           |   |                  |          |   |                  |                                              |
| 482 | date_vt<br>Show the field ONLY if:<br>[arrhythmia(2)] = '1'                                                   | Date VT first developedDo not enter any dates prior to ICU Day1; if VT started prior to ICU Day1 and was still present on ICU Day1, enter the ICU Day1 date                                                                                                                                                                                                                                                                                                                                                                                      | text (date_mdy), Required                                                                                                                                                                                                                                                                                                                                                                                                                                                                                                                                                                                                   |   |                          |                |                                        |                  |                                     |   |                  |             |               |                  |           |   |                  |            |   |                  |           |   |                  |          |   |                  |                                              |
| 483 | date_vfib<br>Show the field ONLY if:<br>[arrhythmia(3)] = '1'                                                 | Date ventricular fibrillation first developedDo not enter any dates prior to ICU Day1; if ventricular fibrillation started prior to ICU Day1 and was still present on ICU Day1, enter the ICU Day1 date                                                                                                                                                                                                                                                                                                                                          | text (date_mdy), Required                                                                                                                                                                                                                                                                                                                                                                                                                                                                                                                                                                                                   |   |                          |                |                                        |                  |                                     |   |                  |             |               |                  |           |   |                  |            |   |                  |           |   |                  |          |   |                  |                                              |
| 484 | myopericard                                                                                                   | New myocarditis and/or pericarditis in the first 14 days following ICU admission?Defined as per chart review                                                                                                                                                                                                                                                                                                                                                                                                                                     | radio, Required<br><table border="1"> <tr><td>1</td><td>Myocarditis only</td></tr> <tr><td>2</td><td>Pericarditis only</td></tr> <tr><td>3</td><td>Both</td></tr> <tr><td>4</td><td>Neither</td></tr> </table>                                                                                                                                                                                                                                                                                                                                                                                                              | 1 | Myocarditis only         | 2              | Pericarditis only                      | 3                | Both                                | 4 | Neither          |             |               |                  |           |   |                  |            |   |                  |           |   |                  |          |   |                  |                                              |
| 1   | Myocarditis only                                                                                              |                                                                                                                                                                                                                                                                                                                                                                                                                                                                                                                                                  |                                                                                                                                                                                                                                                                                                                                                                                                                                                                                                                                                                                                                             |   |                          |                |                                        |                  |                                     |   |                  |             |               |                  |           |   |                  |            |   |                  |           |   |                  |          |   |                  |                                              |
| 2   | Pericarditis only                                                                                             |                                                                                                                                                                                                                                                                                                                                                                                                                                                                                                                                                  |                                                                                                                                                                                                                                                                                                                                                                                                                                                                                                                                                                                                                             |   |                          |                |                                        |                  |                                     |   |                  |             |               |                  |           |   |                  |            |   |                  |           |   |                  |          |   |                  |                                              |
| 3   | Both                                                                                                          |                                                                                                                                                                                                                                                                                                                                                                                                                                                                                                                                                  |                                                                                                                                                                                                                                                                                                                                                                                                                                                                                                                                                                                                                             |   |                          |                |                                        |                  |                                     |   |                  |             |               |                  |           |   |                  |            |   |                  |           |   |                  |          |   |                  |                                              |
| 4   | Neither                                                                                                       |                                                                                                                                                                                                                                                                                                                                                                                                                                                                                                                                                  |                                                                                                                                                                                                                                                                                                                                                                                                                                                                                                                                                                                                                             |   |                          |                |                                        |                  |                                     |   |                  |             |               |                  |           |   |                  |            |   |                  |           |   |                  |          |   |                  |                                              |
| 485 | date_mycoperi<br>Show the field ONLY if:<br>[myopericard] = '1' or [myopericard] = '2' or [myopericard] = '3' | Date myocarditis or pericarditis first developedDo not enter any dates prior to ICU Day1; if myocarditis or pericarditis started prior to ICU Day1 and was still present on ICU Day1, enter the ICU Day1 date                                                                                                                                                                                                                                                                                                                                    | text (date_mdy), Required                                                                                                                                                                                                                                                                                                                                                                                                                                                                                                                                                                                                   |   |                          |                |                                        |                  |                                     |   |                  |             |               |                  |           |   |                  |            |   |                  |           |   |                  |          |   |                  |                                              |
| 486 | card_arrest                                                                                                   | Cardiac arrest in the first 14 days following ICU admission? Refers to UNEXPECTED cessation of cardiac activity associated with loss of a pulse, for which CPR would normally be administered (whether or not CPR was actually administered). Thus, patients who did not receive CPR due to DNR status SHOULD be included as long as the cardiac arrest was unexpected. However, patients whose death was expected (e.g., if the patient was terminally extubated and/or their goals of care were comfort measures only) should NOT be included. | yesno, Required<br><table border="1"> <tr><td>1</td><td>Yes</td></tr> <tr><td>0</td><td>No</td></tr> </table>                                                                                                                                                                                                                                                                                                                                                                                                                                                                                                               | 1 | Yes                      | 0              | No                                     |                  |                                     |   |                  |             |               |                  |           |   |                  |            |   |                  |           |   |                  |          |   |                  |                                              |
| 1   | Yes                                                                                                           |                                                                                                                                                                                                                                                                                                                                                                                                                                                                                                                                                  |                                                                                                                                                                                                                                                                                                                                                                                                                                                                                                                                                                                                                             |   |                          |                |                                        |                  |                                     |   |                  |             |               |                  |           |   |                  |            |   |                  |           |   |                  |          |   |                  |                                              |
| 0   | No                                                                                                            |                                                                                                                                                                                                                                                                                                                                                                                                                                                                                                                                                  |                                                                                                                                                                                                                                                                                                                                                                                                                                                                                                                                                                                                                             |   |                          |                |                                        |                  |                                     |   |                  |             |               |                  |           |   |                  |            |   |                  |           |   |                  |          |   |                  |                                              |
| 487 | cpr<br>Show the field ONLY if:<br>[card_arrest] = '1'                                                         | Was CPR administered?*Some hospitals have prohibited CPR in COVID patients to protect healthcare workers                                                                                                                                                                                                                                                                                                                                                                                                                                         | radio, Required<br><table border="1"> <tr><td>1</td><td>Yes</td></tr> <tr><td>2</td><td>No because they were DNR</td></tr> <tr><td>3</td><td>No because of hospital policy*</td></tr> </table>                                                                                                                                                                                                                                                                                                                                                                                                                              | 1 | Yes                      | 2              | No because they were DNR               | 3                | No because of hospital policy*      |   |                  |             |               |                  |           |   |                  |            |   |                  |           |   |                  |          |   |                  |                                              |
| 1   | Yes                                                                                                           |                                                                                                                                                                                                                                                                                                                                                                                                                                                                                                                                                  |                                                                                                                                                                                                                                                                                                                                                                                                                                                                                                                                                                                                                             |   |                          |                |                                        |                  |                                     |   |                  |             |               |                  |           |   |                  |            |   |                  |           |   |                  |          |   |                  |                                              |
| 2   | No because they were DNR                                                                                      |                                                                                                                                                                                                                                                                                                                                                                                                                                                                                                                                                  |                                                                                                                                                                                                                                                                                                                                                                                                                                                                                                                                                                                                                             |   |                          |                |                                        |                  |                                     |   |                  |             |               |                  |           |   |                  |            |   |                  |           |   |                  |          |   |                  |                                              |
| 3   | No because of hospital policy*                                                                                |                                                                                                                                                                                                                                                                                                                                                                                                                                                                                                                                                  |                                                                                                                                                                                                                                                                                                                                                                                                                                                                                                                                                                                                                             |   |                          |                |                                        |                  |                                     |   |                  |             |               |                  |           |   |                  |            |   |                  |           |   |                  |          |   |                  |                                              |
| 488 | date_arrest<br>Show the field ONLY if:<br>[card_arrest] = '1'                                                 | Date of first cardiac arrest                                                                                                                                                                                                                                                                                                                                                                                                                                                                                                                     | text (date_mdy), Required                                                                                                                                                                                                                                                                                                                                                                                                                                                                                                                                                                                                   |   |                          |                |                                        |                  |                                     |   |                  |             |               |                  |           |   |                  |            |   |                  |           |   |                  |          |   |                  |                                              |
| 489 | initial_rhythm<br>Show the field ONLY if:<br>[cpr] = '1'                                                      | Initial cardiac rhythm                                                                                                                                                                                                                                                                                                                                                                                                                                                                                                                           | radio, Required<br><table border="1"> <tr><td>1</td><td>Ventricular fibrillation</td></tr> <tr><td>2</td><td>Pulseless ventricular tachycardia (VT)</td></tr> <tr><td>3</td><td>Pulseless electrical activity (PEA)</td></tr> <tr><td>4</td><td>Asystole</td></tr> <tr><td>5</td><td>Other/Unknown</td></tr> </table>                                                                                                                                                                                                                                                                                                       | 1 | Ventricular fibrillation | 2              | Pulseless ventricular tachycardia (VT) | 3                | Pulseless electrical activity (PEA) | 4 | Asystole         | 5           | Other/Unknown |                  |           |   |                  |            |   |                  |           |   |                  |          |   |                  |                                              |
| 1   | Ventricular fibrillation                                                                                      |                                                                                                                                                                                                                                                                                                                                                                                                                                                                                                                                                  |                                                                                                                                                                                                                                                                                                                                                                                                                                                                                                                                                                                                                             |   |                          |                |                                        |                  |                                     |   |                  |             |               |                  |           |   |                  |            |   |                  |           |   |                  |          |   |                  |                                              |
| 2   | Pulseless ventricular tachycardia (VT)                                                                        |                                                                                                                                                                                                                                                                                                                                                                                                                                                                                                                                                  |                                                                                                                                                                                                                                                                                                                                                                                                                                                                                                                                                                                                                             |   |                          |                |                                        |                  |                                     |   |                  |             |               |                  |           |   |                  |            |   |                  |           |   |                  |          |   |                  |                                              |
| 3   | Pulseless electrical activity (PEA)                                                                           |                                                                                                                                                                                                                                                                                                                                                                                                                                                                                                                                                  |                                                                                                                                                                                                                                                                                                                                                                                                                                                                                                                                                                                                                             |   |                          |                |                                        |                  |                                     |   |                  |             |               |                  |           |   |                  |            |   |                  |           |   |                  |          |   |                  |                                              |
| 4   | Asystole                                                                                                      |                                                                                                                                                                                                                                                                                                                                                                                                                                                                                                                                                  |                                                                                                                                                                                                                                                                                                                                                                                                                                                                                                                                                                                                                             |   |                          |                |                                        |                  |                                     |   |                  |             |               |                  |           |   |                  |            |   |                  |           |   |                  |          |   |                  |                                              |
| 5   | Other/Unknown                                                                                                 |                                                                                                                                                                                                                                                                                                                                                                                                                                                                                                                                                  |                                                                                                                                                                                                                                                                                                                                                                                                                                                                                                                                                                                                                             |   |                          |                |                                        |                  |                                     |   |                  |             |               |                  |           |   |                  |            |   |                  |           |   |                  |          |   |                  |                                              |
| 490 | cpr_therapies<br>Show the field ONLY if:<br>[cpr] = '1'                                                       | Therapies administered during CPR (select all that apply)                                                                                                                                                                                                                                                                                                                                                                                                                                                                                        | checkbox, Required<br><table border="1"> <tr><td>1</td><td>cpr_therapies__1</td><td>Defibrillation</td></tr> <tr><td>2</td><td>cpr_therapies__2</td><td>Epinephrine (Epi)</td></tr> <tr><td>3</td><td>cpr_therapies__3</td><td>Vasopressin</td></tr> <tr><td>4</td><td>cpr_therapies__4</td><td>Adenosine</td></tr> <tr><td>5</td><td>cpr_therapies__5</td><td>Amiodarone</td></tr> <tr><td>6</td><td>cpr_therapies__6</td><td>Lidocaine</td></tr> <tr><td>7</td><td>cpr_therapies__7</td><td>Atropine</td></tr> <tr><td>8</td><td>cpr_therapies__8</td><td>None of the above (chest compressions alone)</td></tr> </table> | 1 | cpr_therapies__1         | Defibrillation | 2                                      | cpr_therapies__2 | Epinephrine (Epi)                   | 3 | cpr_therapies__3 | Vasopressin | 4             | cpr_therapies__4 | Adenosine | 5 | cpr_therapies__5 | Amiodarone | 6 | cpr_therapies__6 | Lidocaine | 7 | cpr_therapies__7 | Atropine | 8 | cpr_therapies__8 | None of the above (chest compressions alone) |
| 1   | cpr_therapies__1                                                                                              | Defibrillation                                                                                                                                                                                                                                                                                                                                                                                                                                                                                                                                   |                                                                                                                                                                                                                                                                                                                                                                                                                                                                                                                                                                                                                             |   |                          |                |                                        |                  |                                     |   |                  |             |               |                  |           |   |                  |            |   |                  |           |   |                  |          |   |                  |                                              |
| 2   | cpr_therapies__2                                                                                              | Epinephrine (Epi)                                                                                                                                                                                                                                                                                                                                                                                                                                                                                                                                |                                                                                                                                                                                                                                                                                                                                                                                                                                                                                                                                                                                                                             |   |                          |                |                                        |                  |                                     |   |                  |             |               |                  |           |   |                  |            |   |                  |           |   |                  |          |   |                  |                                              |
| 3   | cpr_therapies__3                                                                                              | Vasopressin                                                                                                                                                                                                                                                                                                                                                                                                                                                                                                                                      |                                                                                                                                                                                                                                                                                                                                                                                                                                                                                                                                                                                                                             |   |                          |                |                                        |                  |                                     |   |                  |             |               |                  |           |   |                  |            |   |                  |           |   |                  |          |   |                  |                                              |
| 4   | cpr_therapies__4                                                                                              | Adenosine                                                                                                                                                                                                                                                                                                                                                                                                                                                                                                                                        |                                                                                                                                                                                                                                                                                                                                                                                                                                                                                                                                                                                                                             |   |                          |                |                                        |                  |                                     |   |                  |             |               |                  |           |   |                  |            |   |                  |           |   |                  |          |   |                  |                                              |
| 5   | cpr_therapies__5                                                                                              | Amiodarone                                                                                                                                                                                                                                                                                                                                                                                                                                                                                                                                       |                                                                                                                                                                                                                                                                                                                                                                                                                                                                                                                                                                                                                             |   |                          |                |                                        |                  |                                     |   |                  |             |               |                  |           |   |                  |            |   |                  |           |   |                  |          |   |                  |                                              |
| 6   | cpr_therapies__6                                                                                              | Lidocaine                                                                                                                                                                                                                                                                                                                                                                                                                                                                                                                                        |                                                                                                                                                                                                                                                                                                                                                                                                                                                                                                                                                                                                                             |   |                          |                |                                        |                  |                                     |   |                  |             |               |                  |           |   |                  |            |   |                  |           |   |                  |          |   |                  |                                              |
| 7   | cpr_therapies__7                                                                                              | Atropine                                                                                                                                                                                                                                                                                                                                                                                                                                                                                                                                         |                                                                                                                                                                                                                                                                                                                                                                                                                                                                                                                                                                                                                             |   |                          |                |                                        |                  |                                     |   |                  |             |               |                  |           |   |                  |            |   |                  |           |   |                  |          |   |                  |                                              |
| 8   | cpr_therapies__8                                                                                              | None of the above (chest compressions alone)                                                                                                                                                                                                                                                                                                                                                                                                                                                                                                     |                                                                                                                                                                                                                                                                                                                                                                                                                                                                                                                                                                                                                             |   |                          |                |                                        |                  |                                     |   |                  |             |               |                  |           |   |                  |            |   |                  |           |   |                  |          |   |                  |                                              |

|     |                                                                      |                                                                                                                                                                                                                                                                                                                                                                                                                                                                                                                                                                              |                                                                                                                                                                                                                                                                                                                                                                                                                                                                                                                                                                                 |   |                   |                                                       |    |                   |                         |   |                   |                |   |                   |                                           |   |                   |                            |   |               |                   |
|-----|----------------------------------------------------------------------|------------------------------------------------------------------------------------------------------------------------------------------------------------------------------------------------------------------------------------------------------------------------------------------------------------------------------------------------------------------------------------------------------------------------------------------------------------------------------------------------------------------------------------------------------------------------------|---------------------------------------------------------------------------------------------------------------------------------------------------------------------------------------------------------------------------------------------------------------------------------------------------------------------------------------------------------------------------------------------------------------------------------------------------------------------------------------------------------------------------------------------------------------------------------|---|-------------------|-------------------------------------------------------|----|-------------------|-------------------------|---|-------------------|----------------|---|-------------------|-------------------------------------------|---|-------------------|----------------------------|---|---------------|-------------------|
| 491 | duration_cpr<br>Show the field ONLY if: [cpr] = '1'                  | Total duration of the code (in minutes)If unknown, enter, "N/A"                                                                                                                                                                                                                                                                                                                                                                                                                                                                                                              | text, Required                                                                                                                                                                                                                                                                                                                                                                                                                                                                                                                                                                  |   |                   |                                                       |    |                   |                         |   |                   |                |   |                   |                                           |   |                   |                            |   |               |                   |
| 492 | newinfection                                                         | New infection in the first 14 days following ICU admission? Defined as a suspected or confirmed new infection other than COVID-19 that developed after admission to the ICUShould be primarily based on culture data (e.g., sputum, blood, urine, and stool), though other infections can also be included (e.g., cellulitis, abscess) if there was a strong clinical suspicion, even in the absence of positive culturesDo not enter any dates prior to ICU Day1; if the new infection started prior to ICU Day1 and was still present on ICU Day1, enter the ICU Day1 date | yesno, Required<br><table border="1"> <tr> <td>1</td> <td>Yes</td> </tr> <tr> <td>0</td> <td>No</td> </tr> </table>                                                                                                                                                                                                                                                                                                                                                                                                                                                             | 1 | Yes               | 0                                                     | No |                   |                         |   |                   |                |   |                   |                                           |   |                   |                            |   |               |                   |
| 1   | Yes                                                                  |                                                                                                                                                                                                                                                                                                                                                                                                                                                                                                                                                                              |                                                                                                                                                                                                                                                                                                                                                                                                                                                                                                                                                                                 |   |                   |                                                       |    |                   |                         |   |                   |                |   |                   |                                           |   |                   |                            |   |               |                   |
| 0   | No                                                                   |                                                                                                                                                                                                                                                                                                                                                                                                                                                                                                                                                                              |                                                                                                                                                                                                                                                                                                                                                                                                                                                                                                                                                                                 |   |                   |                                                       |    |                   |                         |   |                   |                |   |                   |                                           |   |                   |                            |   |               |                   |
| 493 | type_infection<br>Show the field ONLY if: [newinfection] = '1'       | What infection(s)?                                                                                                                                                                                                                                                                                                                                                                                                                                                                                                                                                           | checkbox, Required<br><table border="1"> <tr> <td>1</td> <td>type_infection__1</td> <td>Pneumonia (including ventilator-associated pneumonia)</td> </tr> <tr> <td>2</td> <td>type_infection__2</td> <td>Urosepsis</td> </tr> <tr> <td>3</td> <td>type_infection__3</td> <td>Biliary sepsis</td> </tr> <tr> <td>4</td> <td>type_infection__4</td> <td>Bacteremia</td> </tr> <tr> <td>5</td> <td>type_infection__5</td> <td>Other</td> </tr> </table>                                                                                                                             | 1 | type_infection__1 | Pneumonia (including ventilator-associated pneumonia) | 2  | type_infection__2 | Urosepsis               | 3 | type_infection__3 | Biliary sepsis | 4 | type_infection__4 | Bacteremia                                | 5 | type_infection__5 | Other                      |   |               |                   |
| 1   | type_infection__1                                                    | Pneumonia (including ventilator-associated pneumonia)                                                                                                                                                                                                                                                                                                                                                                                                                                                                                                                        |                                                                                                                                                                                                                                                                                                                                                                                                                                                                                                                                                                                 |   |                   |                                                       |    |                   |                         |   |                   |                |   |                   |                                           |   |                   |                            |   |               |                   |
| 2   | type_infection__2                                                    | Urosepsis                                                                                                                                                                                                                                                                                                                                                                                                                                                                                                                                                                    |                                                                                                                                                                                                                                                                                                                                                                                                                                                                                                                                                                                 |   |                   |                                                       |    |                   |                         |   |                   |                |   |                   |                                           |   |                   |                            |   |               |                   |
| 3   | type_infection__3                                                    | Biliary sepsis                                                                                                                                                                                                                                                                                                                                                                                                                                                                                                                                                               |                                                                                                                                                                                                                                                                                                                                                                                                                                                                                                                                                                                 |   |                   |                                                       |    |                   |                         |   |                   |                |   |                   |                                           |   |                   |                            |   |               |                   |
| 4   | type_infection__4                                                    | Bacteremia                                                                                                                                                                                                                                                                                                                                                                                                                                                                                                                                                                   |                                                                                                                                                                                                                                                                                                                                                                                                                                                                                                                                                                                 |   |                   |                                                       |    |                   |                         |   |                   |                |   |                   |                                           |   |                   |                            |   |               |                   |
| 5   | type_infection__5                                                    | Other                                                                                                                                                                                                                                                                                                                                                                                                                                                                                                                                                                        |                                                                                                                                                                                                                                                                                                                                                                                                                                                                                                                                                                                 |   |                   |                                                       |    |                   |                         |   |                   |                |   |                   |                                           |   |                   |                            |   |               |                   |
| 494 | other_infxn<br>Show the field ONLY if: [type_infection(5)] = '1'     | Enter other infection                                                                                                                                                                                                                                                                                                                                                                                                                                                                                                                                                        | text, Required                                                                                                                                                                                                                                                                                                                                                                                                                                                                                                                                                                  |   |                   |                                                       |    |                   |                         |   |                   |                |   |                   |                                           |   |                   |                            |   |               |                   |
| 495 | date_pneum<br>Show the field ONLY if: [type_infection(1)] = '1'      | Date pneumonia developedDo not enter any dates prior to ICU Day1; if pneumonia started prior to ICU Day1 and was still present on ICU Day1, enter the ICU Day1 date                                                                                                                                                                                                                                                                                                                                                                                                          | text (date_mdy), Required                                                                                                                                                                                                                                                                                                                                                                                                                                                                                                                                                       |   |                   |                                                       |    |                   |                         |   |                   |                |   |                   |                                           |   |                   |                            |   |               |                   |
| 496 | date_urosep<br>Show the field ONLY if: [type_infection(2)] = '1'     | Date urosepsis developedDo not enter any dates prior to ICU Day1; if urosepsis started prior to ICU Day1 and was still present on ICU Day1, enter the ICU Day1 date                                                                                                                                                                                                                                                                                                                                                                                                          | text (date_mdy), Required                                                                                                                                                                                                                                                                                                                                                                                                                                                                                                                                                       |   |                   |                                                       |    |                   |                         |   |                   |                |   |                   |                                           |   |                   |                            |   |               |                   |
| 497 | date_biliary<br>Show the field ONLY if: [type_infection(3)] = '1'    | Date biliary sepsis developedDo not enter any dates prior to ICU Day1; if biliary sepsis started prior to ICU Day1 and was still present on ICU Day1, enter the ICU Day1 date                                                                                                                                                                                                                                                                                                                                                                                                | text (date_mdy), Required                                                                                                                                                                                                                                                                                                                                                                                                                                                                                                                                                       |   |                   |                                                       |    |                   |                         |   |                   |                |   |                   |                                           |   |                   |                            |   |               |                   |
| 498 | date_bacteremia<br>Show the field ONLY if: [type_infection(4)] = '1' | Date bacteremia developedDo not enter any dates prior to ICU Day1; if bacteremia started prior to ICU Day1 and was still present on ICU Day1, enter the ICU Day1 date                                                                                                                                                                                                                                                                                                                                                                                                        | text (date_mdy), Required                                                                                                                                                                                                                                                                                                                                                                                                                                                                                                                                                       |   |                   |                                                       |    |                   |                         |   |                   |                |   |                   |                                           |   |                   |                            |   |               |                   |
| 499 | date_otherinfxn<br>Show the field ONLY if: [type_infection(5)] = '1' | Date other infection developedDo not enter any dates prior to ICU Day1; if other infection started prior to ICU Day1 and was still present on ICU Day1, enter the ICU Day1 date                                                                                                                                                                                                                                                                                                                                                                                              | text (date_mdy), Required                                                                                                                                                                                                                                                                                                                                                                                                                                                                                                                                                       |   |                   |                                                       |    |                   |                         |   |                   |                |   |                   |                                           |   |                   |                            |   |               |                   |
| 500 | thrombosis                                                           | New thromboembolic event in the first 14 days following ICU admission (select all that apply)                                                                                                                                                                                                                                                                                                                                                                                                                                                                                | checkbox, Required<br><table border="1"> <tr> <td>1</td> <td>thrombosis__1</td> <td>Deep venous thrombosis (DVT)</td> </tr> <tr> <td>2</td> <td>thrombosis__2</td> <td>Pulmonary embolism (PE)</td> </tr> <tr> <td>3</td> <td>thrombosis__3</td> <td>Stroke</td> </tr> <tr> <td>4</td> <td>thrombosis__4</td> <td>Heparin-induced thrombocytopenia (H.I.T.)</td> </tr> <tr> <td>5</td> <td>thrombosis__5</td> <td>Other thromboembolic event</td> </tr> <tr> <td>6</td> <td>thrombosis__6</td> <td>None of the above</td> </tr> </table><br>Field Annotation: @NONEOFTHEABOVE=6 | 1 | thrombosis__1     | Deep venous thrombosis (DVT)                          | 2  | thrombosis__2     | Pulmonary embolism (PE) | 3 | thrombosis__3     | Stroke         | 4 | thrombosis__4     | Heparin-induced thrombocytopenia (H.I.T.) | 5 | thrombosis__5     | Other thromboembolic event | 6 | thrombosis__6 | None of the above |
| 1   | thrombosis__1                                                        | Deep venous thrombosis (DVT)                                                                                                                                                                                                                                                                                                                                                                                                                                                                                                                                                 |                                                                                                                                                                                                                                                                                                                                                                                                                                                                                                                                                                                 |   |                   |                                                       |    |                   |                         |   |                   |                |   |                   |                                           |   |                   |                            |   |               |                   |
| 2   | thrombosis__2                                                        | Pulmonary embolism (PE)                                                                                                                                                                                                                                                                                                                                                                                                                                                                                                                                                      |                                                                                                                                                                                                                                                                                                                                                                                                                                                                                                                                                                                 |   |                   |                                                       |    |                   |                         |   |                   |                |   |                   |                                           |   |                   |                            |   |               |                   |
| 3   | thrombosis__3                                                        | Stroke                                                                                                                                                                                                                                                                                                                                                                                                                                                                                                                                                                       |                                                                                                                                                                                                                                                                                                                                                                                                                                                                                                                                                                                 |   |                   |                                                       |    |                   |                         |   |                   |                |   |                   |                                           |   |                   |                            |   |               |                   |
| 4   | thrombosis__4                                                        | Heparin-induced thrombocytopenia (H.I.T.)                                                                                                                                                                                                                                                                                                                                                                                                                                                                                                                                    |                                                                                                                                                                                                                                                                                                                                                                                                                                                                                                                                                                                 |   |                   |                                                       |    |                   |                         |   |                   |                |   |                   |                                           |   |                   |                            |   |               |                   |
| 5   | thrombosis__5                                                        | Other thromboembolic event                                                                                                                                                                                                                                                                                                                                                                                                                                                                                                                                                   |                                                                                                                                                                                                                                                                                                                                                                                                                                                                                                                                                                                 |   |                   |                                                       |    |                   |                         |   |                   |                |   |                   |                                           |   |                   |                            |   |               |                   |
| 6   | thrombosis__6                                                        | None of the above                                                                                                                                                                                                                                                                                                                                                                                                                                                                                                                                                            |                                                                                                                                                                                                                                                                                                                                                                                                                                                                                                                                                                                 |   |                   |                                                       |    |                   |                         |   |                   |                |   |                   |                                           |   |                   |                            |   |               |                   |
| 501 | other_embolic<br>Show the field ONLY if: [thrombosis(5)] = '1'       | Enter other thromboembolic event                                                                                                                                                                                                                                                                                                                                                                                                                                                                                                                                             | text, Required                                                                                                                                                                                                                                                                                                                                                                                                                                                                                                                                                                  |   |                   |                                                       |    |                   |                         |   |                   |                |   |                   |                                           |   |                   |                            |   |               |                   |
| 502 | date_dvt<br>Show the field ONLY if: [thrombosis(1)] = '1'            | Date of DVTD do not enter any dates prior to ICU Day1; if the DVT started prior to ICU Day1 and was still present on ICU Day1, enter the ICU Day1 date                                                                                                                                                                                                                                                                                                                                                                                                                       | text (date_mdy), Required                                                                                                                                                                                                                                                                                                                                                                                                                                                                                                                                                       |   |                   |                                                       |    |                   |                         |   |                   |                |   |                   |                                           |   |                   |                            |   |               |                   |

|     |                                                                            |                                                                                                                                                                                                                                                                                                                                                                                                                                                                                                                                                                                                                        |                                                                                                                                                                                                  |
|-----|----------------------------------------------------------------------------|------------------------------------------------------------------------------------------------------------------------------------------------------------------------------------------------------------------------------------------------------------------------------------------------------------------------------------------------------------------------------------------------------------------------------------------------------------------------------------------------------------------------------------------------------------------------------------------------------------------------|--------------------------------------------------------------------------------------------------------------------------------------------------------------------------------------------------|
| 503 | dvt_confirmed<br>Show the field ONLY if:<br>[thrombosis(1)] = '1'          | DVT confirmed on diagnostic imaging (e.g., ultrasound)?                                                                                                                                                                                                                                                                                                                                                                                                                                                                                                                                                                | yesno, Required<br>1 Yes<br>0 No                                                                                                                                                                 |
| 504 | dvt_confirmed_2<br>Show the field ONLY if:<br>[thrombosis(1)] = '1'        | Location of the DVT (select all that apply)Lower extremity PROXIMAL refers to the thigh/knee (e.g., inferior vena cava, iliac, common femoral/superficial femoral/deep femoral, or popliteal veins)Lower extremity DISTAL refers to the calf (e.g., peroneal, tibial, gastrocnemius, soleal, calf perforator veins)Upper extremity or neck includes the internal jugular and subclavian veinsOther includes abdominal vein thrombosis, cerebral venous sinus thrombosis, and others Superficial Veins (if in isolation, enter as "other thrombosis" not DVT) Great saphenous vein Small saphenous vein Reticular veins | checkbox, Required<br>1 dvt_confirmed_2__1 Lower extremity PROXIMAL<br>2 dvt_confirmed_2__2 Lower extremity DISTAL<br>3 dvt_confirmed_2__3 Upper extremity or neck<br>4 dvt_confirmed_2__4 Other |
| 505 | date_pe<br>Show the field ONLY if:<br>[thrombosis(2)] = '1'                | Date of Pulmonary Embolism (PE)Do not enter any dates prior to ICU Day1; if the PE started prior to ICU Day1 and was still present on ICU Day1, enter the ICU Day1 date                                                                                                                                                                                                                                                                                                                                                                                                                                                | text (date_mdy), Required                                                                                                                                                                        |
| 506 | pe_confirmed<br>Show the field ONLY if:<br>[thrombosis(2)] = '1'           | Was the pulmonary embolism confirmed on imaging?                                                                                                                                                                                                                                                                                                                                                                                                                                                                                                                                                                       | radio, Required<br>1 Yes - by CT scan<br>2 Yes - by V/Q scan (or other modality)<br>3 No, the diagnosis was based on clinical suspicion only                                                     |
| 507 | pe_location<br>Show the field ONLY if:<br>[pe_confirmed] = '1'             | What was the location of the pulmonary embolism?                                                                                                                                                                                                                                                                                                                                                                                                                                                                                                                                                                       | radio, Required<br>1 Proximal (lobar or segmental pulmonary vessels)<br>2 Distal (subsegmental pulmonary vessels)<br>3 Both proximal and distal                                                  |
| 508 | date_stroke<br>Show the field ONLY if:<br>[thrombosis(3)] = '1'            | Date of strokeDo not enter any dates prior to ICU Day1; if the stroke started prior to ICU Day1 and was still present on ICU Day1, enter the ICU Day1 date                                                                                                                                                                                                                                                                                                                                                                                                                                                             | text (date_mdy), Required                                                                                                                                                                        |
| 509 | stroke_confirmed<br>Show the field ONLY if:<br>[thrombosis(3)] = '1'       | Was the stroke confirmed on brain imaging?                                                                                                                                                                                                                                                                                                                                                                                                                                                                                                                                                                             | yesno, Required<br>1 Yes<br>0 No                                                                                                                                                                 |
| 510 | date_hit<br>Show the field ONLY if:<br>[thrombosis(4)] = '1'               | Date HIT developedDo not enter any dates prior to ICU Day1; if the HIT started prior to ICU Day1 and was still present on ICU Day1, enter the ICU Day1 date                                                                                                                                                                                                                                                                                                                                                                                                                                                            | text (date_mdy), Required                                                                                                                                                                        |
| 511 | thrombosis_hit<br>Show the field ONLY if:<br>[thrombosis(4)] = '1'         | Thromboembolic event(s) in association with HIT?                                                                                                                                                                                                                                                                                                                                                                                                                                                                                                                                                                       | yesno, Required<br>1 Yes<br>0 No                                                                                                                                                                 |
| 512 | thrombosis_events_hit<br>Show the field ONLY if:<br>[thrombosis_hit] = '1' | Enter the thromboembolic event(s) in association with HIT?                                                                                                                                                                                                                                                                                                                                                                                                                                                                                                                                                             | text, Required                                                                                                                                                                                   |
| 513 | date_othereambo<br>Show the field ONLY if:<br>[thrombosis(5)] = '1'        | Date of other thromboembolic eventDo not enter any dates prior to ICU Day1; if the other thromboembolic event started prior to ICU Day1 and was still present on ICU Day1, enter the ICU Day1 date                                                                                                                                                                                                                                                                                                                                                                                                                     | text (date_mdy), Required                                                                                                                                                                        |
| 514 | new_coagulopathy<br>Show the field ONLY if:<br>[new_coagulopathy] = '1'    | New coagulopathy in the first 14 days following ICU admission-Defined as INR>2 or PTT>40 in the absence of therapeutic anticoagulation-If the patient was receiving therapeutic anticoagulation, select "no"                                                                                                                                                                                                                                                                                                                                                                                                           | yesno, Required<br>1 Yes<br>0 No                                                                                                                                                                 |
| 515 | date_coagulopathy<br>Show the field ONLY if:<br>[new_coagulopathy] = '1'   | Date coagulopathy developedDo not enter any dates prior to ICU Day1; if the coagulopathy started prior to ICU Day1 and was still present on ICU Day1, enter the ICU Day1 date                                                                                                                                                                                                                                                                                                                                                                                                                                          | text (date_mdy), Required                                                                                                                                                                        |
| 516 | peak_ptt<br>Show the field ONLY if:<br>[new_coagulopathy] = '1'            | Peak PTT (seconds) in the absence of therapeutic anticoagulationIf none available, enter "N/A"                                                                                                                                                                                                                                                                                                                                                                                                                                                                                                                         | text, Required                                                                                                                                                                                   |



|     |                                                                                    |                                                                                                                                                                                                                                                                                                                                                                                                                                                                                                                                                                                                                       |                                                                                                                                                                                                                                                                                                                                                                                                                                                                                                                                        |   |                                         |         |                                         |                            |                      |   |                            |           |   |                            |            |   |                            |             |   |                            |      |
|-----|------------------------------------------------------------------------------------|-----------------------------------------------------------------------------------------------------------------------------------------------------------------------------------------------------------------------------------------------------------------------------------------------------------------------------------------------------------------------------------------------------------------------------------------------------------------------------------------------------------------------------------------------------------------------------------------------------------------------|----------------------------------------------------------------------------------------------------------------------------------------------------------------------------------------------------------------------------------------------------------------------------------------------------------------------------------------------------------------------------------------------------------------------------------------------------------------------------------------------------------------------------------------|---|-----------------------------------------|---------|-----------------------------------------|----------------------------|----------------------|---|----------------------------|-----------|---|----------------------------|------------|---|----------------------------|-------------|---|----------------------------|------|
| 517 | upper_limit_ptt<br>Show the field ONLY if:<br>[new_coagulopathy] = '1'             | Upper reference limit of normal for PTT (seconds) at your hospital's lab                                                                                                                                                                                                                                                                                                                                                                                                                                                                                                                                              | text (number, Min: 28, Max: 80), Required                                                                                                                                                                                                                                                                                                                                                                                                                                                                                              |   |                                         |         |                                         |                            |                      |   |                            |           |   |                            |            |   |                            |             |   |                            |      |
| 518 | peak_inr<br>Show the field ONLY if:<br>[new_coagulopathy] = '1'                    | Peak INR in the absence of therapeutic anticoagulationIf none available, enter "N/A"                                                                                                                                                                                                                                                                                                                                                                                                                                                                                                                                  | text, Required                                                                                                                                                                                                                                                                                                                                                                                                                                                                                                                         |   |                                         |         |                                         |                            |                      |   |                            |           |   |                            |            |   |                            |             |   |                            |      |
| 519 | dic                                                                                | New disseminated intravascular coagulation (DIC) in the first 14 days following ICU admission?                                                                                                                                                                                                                                                                                                                                                                                                                                                                                                                        | yesno, Required<br><table border="1"> <tr> <td>1</td> <td>Yes</td> </tr> <tr> <td>0</td> <td>No</td> </tr> </table>                                                                                                                                                                                                                                                                                                                                                                                                                    | 1 | Yes                                     | 0       | No                                      |                            |                      |   |                            |           |   |                            |            |   |                            |             |   |                            |      |
| 1   | Yes                                                                                |                                                                                                                                                                                                                                                                                                                                                                                                                                                                                                                                                                                                                       |                                                                                                                                                                                                                                                                                                                                                                                                                                                                                                                                        |   |                                         |         |                                         |                            |                      |   |                            |           |   |                            |            |   |                            |             |   |                            |      |
| 0   | No                                                                                 |                                                                                                                                                                                                                                                                                                                                                                                                                                                                                                                                                                                                                       |                                                                                                                                                                                                                                                                                                                                                                                                                                                                                                                                        |   |                                         |         |                                         |                            |                      |   |                            |           |   |                            |            |   |                            |             |   |                            |      |
| 520 | date_dic<br>Show the field ONLY if:<br>[dic] = '1'                                 | Date DIC developedDo not enter any dates prior to ICU Day1; if the DIC started prior to ICU Day1 and was still present on ICU Day1, enter the ICU Day1 date                                                                                                                                                                                                                                                                                                                                                                                                                                                           | text (date_mdy), Required                                                                                                                                                                                                                                                                                                                                                                                                                                                                                                              |   |                                         |         |                                         |                            |                      |   |                            |           |   |                            |            |   |                            |             |   |                            |      |
| 521 | major_bleed                                                                        | New major bleed in the first 14 days following ICU admission?Defined as bleeding in a critical area or organ (e.g., intracranial, retroperitoneal, pericardial, or intramuscular bleeding with compartment syndrome) or bleeding requiring a procedural intervention (e.g., EGD or IR embolization). "Requiring" a procedural intervention could include situations where an intervention would regularly be performed, but was not actually performed because the patient was too unstable, or because of logistical/other concerns related to COVID-19.Blood transfusion alone does not qualify as an intervention. | yesno, Required<br><table border="1"> <tr> <td>1</td> <td>Yes</td> </tr> <tr> <td>0</td> <td>No</td> </tr> </table>                                                                                                                                                                                                                                                                                                                                                                                                                    | 1 | Yes                                     | 0       | No                                      |                            |                      |   |                            |           |   |                            |            |   |                            |             |   |                            |      |
| 1   | Yes                                                                                |                                                                                                                                                                                                                                                                                                                                                                                                                                                                                                                                                                                                                       |                                                                                                                                                                                                                                                                                                                                                                                                                                                                                                                                        |   |                                         |         |                                         |                            |                      |   |                            |           |   |                            |            |   |                            |             |   |                            |      |
| 0   | No                                                                                 |                                                                                                                                                                                                                                                                                                                                                                                                                                                                                                                                                                                                                       |                                                                                                                                                                                                                                                                                                                                                                                                                                                                                                                                        |   |                                         |         |                                         |                            |                      |   |                            |           |   |                            |            |   |                            |             |   |                            |      |
| 522 | date_major_bleed<br>Show the field ONLY if:<br>[major_bleed] = '1'                 | Date major bleed occurredDo not enter any dates prior to ICU Day1; if the major bleed started prior to ICU Day1 and was still present on ICU Day1, enter the ICU Day1 date                                                                                                                                                                                                                                                                                                                                                                                                                                            | text (date_mdy), Required                                                                                                                                                                                                                                                                                                                                                                                                                                                                                                              |   |                                         |         |                                         |                            |                      |   |                            |           |   |                            |            |   |                            |             |   |                            |      |
| 523 | bleed_from_anticoag<br>Show the field ONLY if:<br>[major_bleed] = '1'              | Did the major bleed occur in the presence of therapeutic anticoagulation?Do not include DVT prophylaxis (e.g., unfractionated heparin 5,000 units SC or lovenox 30-40 mg SC)                                                                                                                                                                                                                                                                                                                                                                                                                                          | yesno, Required<br><table border="1"> <tr> <td>1</td> <td>Yes</td> </tr> <tr> <td>0</td> <td>No</td> </tr> </table>                                                                                                                                                                                                                                                                                                                                                                                                                    | 1 | Yes                                     | 0       | No                                      |                            |                      |   |                            |           |   |                            |            |   |                            |             |   |                            |      |
| 1   | Yes                                                                                |                                                                                                                                                                                                                                                                                                                                                                                                                                                                                                                                                                                                                       |                                                                                                                                                                                                                                                                                                                                                                                                                                                                                                                                        |   |                                         |         |                                         |                            |                      |   |                            |           |   |                            |            |   |                            |             |   |                            |      |
| 0   | No                                                                                 |                                                                                                                                                                                                                                                                                                                                                                                                                                                                                                                                                                                                                       |                                                                                                                                                                                                                                                                                                                                                                                                                                                                                                                                        |   |                                         |         |                                         |                            |                      |   |                            |           |   |                            |            |   |                            |             |   |                            |      |
| 524 | bleed_ppx_or_intermed_ac<br>Show the field ONLY if:<br>[bleed_from_anticoag] = '0' | Did the major bleed occur in the presence of prophylactic- or intermediate-dose anticoagulation received within 24 hours prior to the bleed?Prophylactic dose anticoagulation includes subcutaneous unfractionated heparin, enoxaparin (LMWH) 30-40mg once daily, or dalteparin 5,000 units once daily Intermediate-dose anticoagulation refers to enoxaparin (LMWH) 30-40 mg twice daily or dalteparin 5,000 units twice daily                                                                                                                                                                                       | radio, Required<br><table border="1"> <tr> <td>1</td> <td>Yes - prophylactic dose anticoagulation</td> </tr> <tr> <td>2</td> <td>Yes - intermediate-dose anticoagulation</td> </tr> <tr> <td>3</td> <td>No</td> </tr> </table>                                                                                                                                                                                                                                                                                                         | 1 | Yes - prophylactic dose anticoagulation | 2       | Yes - intermediate-dose anticoagulation | 3                          | No                   |   |                            |           |   |                            |            |   |                            |             |   |                            |      |
| 1   | Yes - prophylactic dose anticoagulation                                            |                                                                                                                                                                                                                                                                                                                                                                                                                                                                                                                                                                                                                       |                                                                                                                                                                                                                                                                                                                                                                                                                                                                                                                                        |   |                                         |         |                                         |                            |                      |   |                            |           |   |                            |            |   |                            |             |   |                            |      |
| 2   | Yes - intermediate-dose anticoagulation                                            |                                                                                                                                                                                                                                                                                                                                                                                                                                                                                                                                                                                                                       |                                                                                                                                                                                                                                                                                                                                                                                                                                                                                                                                        |   |                                         |         |                                         |                            |                      |   |                            |           |   |                            |            |   |                            |             |   |                            |      |
| 3   | No                                                                                 |                                                                                                                                                                                                                                                                                                                                                                                                                                                                                                                                                                                                                       |                                                                                                                                                                                                                                                                                                                                                                                                                                                                                                                                        |   |                                         |         |                                         |                            |                      |   |                            |           |   |                            |            |   |                            |             |   |                            |      |
| 525 | bleed_from_antiplatelet<br>Show the field ONLY if:<br>[major_bleed] = '1'          | Did the major bleed occur in the presence of any of the following antiplatelet agents received within 24 hours prior to the bleed? (select all that apply)                                                                                                                                                                                                                                                                                                                                                                                                                                                            | checkbox, Required<br><table border="1"> <tr> <td>1</td> <td>bleed_from_antiplatelet__1</td> <td>Aspirin</td> </tr> <tr> <td>2</td> <td>bleed_from_antiplatelet__2</td> <td>Clopidogrel (Plavix)</td> </tr> <tr> <td>3</td> <td>bleed_from_antiplatelet__3</td> <td>Prasugrel</td> </tr> <tr> <td>4</td> <td>bleed_from_antiplatelet__4</td> <td>Ticagrelor</td> </tr> <tr> <td>5</td> <td>bleed_from_antiplatelet__5</td> <td>Ticlopidine</td> </tr> <tr> <td>6</td> <td>bleed_from_antiplatelet__6</td> <td>None</td> </tr> </table> | 1 | bleed_from_antiplatelet__1              | Aspirin | 2                                       | bleed_from_antiplatelet__2 | Clopidogrel (Plavix) | 3 | bleed_from_antiplatelet__3 | Prasugrel | 4 | bleed_from_antiplatelet__4 | Ticagrelor | 5 | bleed_from_antiplatelet__5 | Ticlopidine | 6 | bleed_from_antiplatelet__6 | None |
| 1   | bleed_from_antiplatelet__1                                                         | Aspirin                                                                                                                                                                                                                                                                                                                                                                                                                                                                                                                                                                                                               |                                                                                                                                                                                                                                                                                                                                                                                                                                                                                                                                        |   |                                         |         |                                         |                            |                      |   |                            |           |   |                            |            |   |                            |             |   |                            |      |
| 2   | bleed_from_antiplatelet__2                                                         | Clopidogrel (Plavix)                                                                                                                                                                                                                                                                                                                                                                                                                                                                                                                                                                                                  |                                                                                                                                                                                                                                                                                                                                                                                                                                                                                                                                        |   |                                         |         |                                         |                            |                      |   |                            |           |   |                            |            |   |                            |             |   |                            |      |
| 3   | bleed_from_antiplatelet__3                                                         | Prasugrel                                                                                                                                                                                                                                                                                                                                                                                                                                                                                                                                                                                                             |                                                                                                                                                                                                                                                                                                                                                                                                                                                                                                                                        |   |                                         |         |                                         |                            |                      |   |                            |           |   |                            |            |   |                            |             |   |                            |      |
| 4   | bleed_from_antiplatelet__4                                                         | Ticagrelor                                                                                                                                                                                                                                                                                                                                                                                                                                                                                                                                                                                                            |                                                                                                                                                                                                                                                                                                                                                                                                                                                                                                                                        |   |                                         |         |                                         |                            |                      |   |                            |           |   |                            |            |   |                            |             |   |                            |      |
| 5   | bleed_from_antiplatelet__5                                                         | Ticlopidine                                                                                                                                                                                                                                                                                                                                                                                                                                                                                                                                                                                                           |                                                                                                                                                                                                                                                                                                                                                                                                                                                                                                                                        |   |                                         |         |                                         |                            |                      |   |                            |           |   |                            |            |   |                            |             |   |                            |      |
| 6   | bleed_from_antiplatelet__6                                                         | None                                                                                                                                                                                                                                                                                                                                                                                                                                                                                                                                                                                                                  |                                                                                                                                                                                                                                                                                                                                                                                                                                                                                                                                        |   |                                         |         |                                         |                            |                      |   |                            |           |   |                            |            |   |                            |             |   |                            |      |

|     |                                                                               |                                                                                                                                                                                                                         |                                                                                                                                                                                                                                                                                                                                                                                                                                                                                                                                                                                                                                                                                                                                                                             |   |                   |                  |            |                   |          |   |                   |             |   |                   |            |   |                   |                 |   |                   |                        |   |                   |                  |   |                   |               |   |                   |                                 |    |                    |       |
|-----|-------------------------------------------------------------------------------|-------------------------------------------------------------------------------------------------------------------------------------------------------------------------------------------------------------------------|-----------------------------------------------------------------------------------------------------------------------------------------------------------------------------------------------------------------------------------------------------------------------------------------------------------------------------------------------------------------------------------------------------------------------------------------------------------------------------------------------------------------------------------------------------------------------------------------------------------------------------------------------------------------------------------------------------------------------------------------------------------------------------|---|-------------------|------------------|------------|-------------------|----------|---|-------------------|-------------|---|-------------------|------------|---|-------------------|-----------------|---|-------------------|------------------------|---|-------------------|------------------|---|-------------------|---------------|---|-------------------|---------------------------------|----|--------------------|-------|
| 526 | bleed_location<br>Show the field ONLY if:<br>[major_bleed] = '1'              | Location of major bleeding event(s) (select all that apply)                                                                                                                                                             | checkbox, Required<br><table border="1"> <tr><td>1</td><td>bleed_location__1</td><td>Bronchopulmonary</td></tr> <tr><td>2</td><td>bleed_location__2</td><td>Pleural</td></tr> <tr><td>3</td><td>bleed_location__3</td><td>Pericardial</td></tr> <tr><td>4</td><td>bleed_location__4</td><td>Peritoneal</td></tr> <tr><td>5</td><td>bleed_location__5</td><td>Retroperitoneal</td></tr> <tr><td>6</td><td>bleed_location__6</td><td>Central nervous system</td></tr> <tr><td>7</td><td>bleed_location__7</td><td>Gastrointestinal</td></tr> <tr><td>8</td><td>bleed_location__8</td><td>Genitourinary</td></tr> <tr><td>9</td><td>bleed_location__9</td><td>Musculoskeletal and soft tissue</td></tr> <tr><td>10</td><td>bleed_location__10</td><td>Other</td></tr> </table> | 1 | bleed_location__1 | Bronchopulmonary | 2          | bleed_location__2 | Pleural  | 3 | bleed_location__3 | Pericardial | 4 | bleed_location__4 | Peritoneal | 5 | bleed_location__5 | Retroperitoneal | 6 | bleed_location__6 | Central nervous system | 7 | bleed_location__7 | Gastrointestinal | 8 | bleed_location__8 | Genitourinary | 9 | bleed_location__9 | Musculoskeletal and soft tissue | 10 | bleed_location__10 | Other |
| 1   | bleed_location__1                                                             | Bronchopulmonary                                                                                                                                                                                                        |                                                                                                                                                                                                                                                                                                                                                                                                                                                                                                                                                                                                                                                                                                                                                                             |   |                   |                  |            |                   |          |   |                   |             |   |                   |            |   |                   |                 |   |                   |                        |   |                   |                  |   |                   |               |   |                   |                                 |    |                    |       |
| 2   | bleed_location__2                                                             | Pleural                                                                                                                                                                                                                 |                                                                                                                                                                                                                                                                                                                                                                                                                                                                                                                                                                                                                                                                                                                                                                             |   |                   |                  |            |                   |          |   |                   |             |   |                   |            |   |                   |                 |   |                   |                        |   |                   |                  |   |                   |               |   |                   |                                 |    |                    |       |
| 3   | bleed_location__3                                                             | Pericardial                                                                                                                                                                                                             |                                                                                                                                                                                                                                                                                                                                                                                                                                                                                                                                                                                                                                                                                                                                                                             |   |                   |                  |            |                   |          |   |                   |             |   |                   |            |   |                   |                 |   |                   |                        |   |                   |                  |   |                   |               |   |                   |                                 |    |                    |       |
| 4   | bleed_location__4                                                             | Peritoneal                                                                                                                                                                                                              |                                                                                                                                                                                                                                                                                                                                                                                                                                                                                                                                                                                                                                                                                                                                                                             |   |                   |                  |            |                   |          |   |                   |             |   |                   |            |   |                   |                 |   |                   |                        |   |                   |                  |   |                   |               |   |                   |                                 |    |                    |       |
| 5   | bleed_location__5                                                             | Retroperitoneal                                                                                                                                                                                                         |                                                                                                                                                                                                                                                                                                                                                                                                                                                                                                                                                                                                                                                                                                                                                                             |   |                   |                  |            |                   |          |   |                   |             |   |                   |            |   |                   |                 |   |                   |                        |   |                   |                  |   |                   |               |   |                   |                                 |    |                    |       |
| 6   | bleed_location__6                                                             | Central nervous system                                                                                                                                                                                                  |                                                                                                                                                                                                                                                                                                                                                                                                                                                                                                                                                                                                                                                                                                                                                                             |   |                   |                  |            |                   |          |   |                   |             |   |                   |            |   |                   |                 |   |                   |                        |   |                   |                  |   |                   |               |   |                   |                                 |    |                    |       |
| 7   | bleed_location__7                                                             | Gastrointestinal                                                                                                                                                                                                        |                                                                                                                                                                                                                                                                                                                                                                                                                                                                                                                                                                                                                                                                                                                                                                             |   |                   |                  |            |                   |          |   |                   |             |   |                   |            |   |                   |                 |   |                   |                        |   |                   |                  |   |                   |               |   |                   |                                 |    |                    |       |
| 8   | bleed_location__8                                                             | Genitourinary                                                                                                                                                                                                           |                                                                                                                                                                                                                                                                                                                                                                                                                                                                                                                                                                                                                                                                                                                                                                             |   |                   |                  |            |                   |          |   |                   |             |   |                   |            |   |                   |                 |   |                   |                        |   |                   |                  |   |                   |               |   |                   |                                 |    |                    |       |
| 9   | bleed_location__9                                                             | Musculoskeletal and soft tissue                                                                                                                                                                                         |                                                                                                                                                                                                                                                                                                                                                                                                                                                                                                                                                                                                                                                                                                                                                                             |   |                   |                  |            |                   |          |   |                   |             |   |                   |            |   |                   |                 |   |                   |                        |   |                   |                  |   |                   |               |   |                   |                                 |    |                    |       |
| 10  | bleed_location__10                                                            | Other                                                                                                                                                                                                                   |                                                                                                                                                                                                                                                                                                                                                                                                                                                                                                                                                                                                                                                                                                                                                                             |   |                   |                  |            |                   |          |   |                   |             |   |                   |            |   |                   |                 |   |                   |                        |   |                   |                  |   |                   |               |   |                   |                                 |    |                    |       |
| 527 | bleed_location_other<br>Show the field ONLY if:<br>[bleed_location(10)] = '1' | Enter the other location of the major bleed                                                                                                                                                                             | text, Required                                                                                                                                                                                                                                                                                                                                                                                                                                                                                                                                                                                                                                                                                                                                                              |   |                   |                  |            |                   |          |   |                   |             |   |                   |            |   |                   |                 |   |                   |                        |   |                   |                  |   |                   |               |   |                   |                                 |    |                    |       |
| 528 | pt_bleed<br>Show the field ONLY if:<br>[major_bleed] = '1'                    | PT (seconds) within 24 hours prior to the major bleed-If more than one value is available within 24 hours prior to the bleed, use the value closest to and prior to the bleed-If unavailable, enter, "N/A"              | text, Required                                                                                                                                                                                                                                                                                                                                                                                                                                                                                                                                                                                                                                                                                                                                                              |   |                   |                  |            |                   |          |   |                   |             |   |                   |            |   |                   |                 |   |                   |                        |   |                   |                  |   |                   |               |   |                   |                                 |    |                    |       |
| 529 | ptt_bleed<br>Show the field ONLY if:<br>[major_bleed] = '1'                   | PTT (seconds) within 24 hours prior to the major bleed-If more than one value is available within 24 hours prior to the bleed, use the value closest to and prior to the bleed-If unavailable, enter, "N/A"             | text, Required                                                                                                                                                                                                                                                                                                                                                                                                                                                                                                                                                                                                                                                                                                                                                              |   |                   |                  |            |                   |          |   |                   |             |   |                   |            |   |                   |                 |   |                   |                        |   |                   |                  |   |                   |               |   |                   |                                 |    |                    |       |
| 530 | inr_bleed<br>Show the field ONLY if:<br>[major_bleed] = '1'                   | INR within 24 hours prior to the major bleed-If more than one value is available within 24 hours prior to the bleed, use the value closest to and prior to the bleed-If unavailable, enter, "N/A"                       | text, Required                                                                                                                                                                                                                                                                                                                                                                                                                                                                                                                                                                                                                                                                                                                                                              |   |                   |                  |            |                   |          |   |                   |             |   |                   |            |   |                   |                 |   |                   |                        |   |                   |                  |   |                   |               |   |                   |                                 |    |                    |       |
| 531 | prbcs<br>Show the field ONLY if:<br>[major_bleed] = '1'                       | Did the patient require transfusion of packed red blood cells (pRBCs) for the major bleed?-Enter the total number of units of pRBCs received within 48 hours following the bleed-If no pRBCs were transfused, enter "0" | text (number, Min: 0, Max: 20), Required                                                                                                                                                                                                                                                                                                                                                                                                                                                                                                                                                                                                                                                                                                                                    |   |                   |                  |            |                   |          |   |                   |             |   |                   |            |   |                   |                 |   |                   |                        |   |                   |                  |   |                   |               |   |                   |                                 |    |                    |       |
| 532 | procedure_for_bleed<br>Show the field ONLY if:<br>[major_bleed] = '1'         | Was a procedure or invasive intervention required to stop the major bleed? (e.g., endoscopy, interventional radiology, or surgery)?                                                                                     | yesno, Required<br><table border="1"> <tr><td>1</td><td>Yes</td></tr> <tr><td>0</td><td>No</td></tr> </table>                                                                                                                                                                                                                                                                                                                                                                                                                                                                                                                                                                                                                                                               | 1 | Yes               | 0                | No         |                   |          |   |                   |             |   |                   |            |   |                   |                 |   |                   |                        |   |                   |                  |   |                   |               |   |                   |                                 |    |                    |       |
| 1   | Yes                                                                           |                                                                                                                                                                                                                         |                                                                                                                                                                                                                                                                                                                                                                                                                                                                                                                                                                                                                                                                                                                                                                             |   |                   |                  |            |                   |          |   |                   |             |   |                   |            |   |                   |                 |   |                   |                        |   |                   |                  |   |                   |               |   |                   |                                 |    |                    |       |
| 0   | No                                                                            |                                                                                                                                                                                                                         |                                                                                                                                                                                                                                                                                                                                                                                                                                                                                                                                                                                                                                                                                                                                                                             |   |                   |                  |            |                   |          |   |                   |             |   |                   |            |   |                   |                 |   |                   |                        |   |                   |                  |   |                   |               |   |                   |                                 |    |                    |       |
| 533 | bleed_fatal<br>Show the field ONLY if:<br>[major_bleed] = '1'                 | Was the major bleed clearly fatal, an important contributor to death, or a factor in the decision to withdraw care?                                                                                                     | yesno, Required<br><table border="1"> <tr><td>1</td><td>Yes</td></tr> <tr><td>0</td><td>No</td></tr> </table>                                                                                                                                                                                                                                                                                                                                                                                                                                                                                                                                                                                                                                                               | 1 | Yes               | 0                | No         |                   |          |   |                   |             |   |                   |            |   |                   |                 |   |                   |                        |   |                   |                  |   |                   |               |   |                   |                                 |    |                    |       |
| 1   | Yes                                                                           |                                                                                                                                                                                                                         |                                                                                                                                                                                                                                                                                                                                                                                                                                                                                                                                                                                                                                                                                                                                                                             |   |                   |                  |            |                   |          |   |                   |             |   |                   |            |   |                   |                 |   |                   |                        |   |                   |                  |   |                   |               |   |                   |                                 |    |                    |       |
| 0   | No                                                                            |                                                                                                                                                                                                                         |                                                                                                                                                                                                                                                                                                                                                                                                                                                                                                                                                                                                                                                                                                                                                                             |   |                   |                  |            |                   |          |   |                   |             |   |                   |            |   |                   |                 |   |                   |                        |   |                   |                  |   |                   |               |   |                   |                                 |    |                    |       |
| 534 | notes_organ                                                                   | Additional Notes (if any)                                                                                                                                                                                               | notes                                                                                                                                                                                                                                                                                                                                                                                                                                                                                                                                                                                                                                                                                                                                                                       |   |                   |                  |            |                   |          |   |                   |             |   |                   |            |   |                   |                 |   |                   |                        |   |                   |                  |   |                   |               |   |                   |                                 |    |                    |       |
| 535 | acute_organ_injury_in_the_first_14_days_following_completion                  | Section Header: <i>Form Status</i><br>Complete?                                                                                                                                                                         | dropdown<br><table border="1"> <tr><td>0</td><td>Incomplete</td></tr> <tr><td>1</td><td>Unverified</td></tr> <tr><td>2</td><td>Complete</td></tr> </table>                                                                                                                                                                                                                                                                                                                                                                                                                                                                                                                                                                                                                  | 0 | Incomplete        | 1                | Unverified | 2                 | Complete |   |                   |             |   |                   |            |   |                   |                 |   |                   |                        |   |                   |                  |   |                   |               |   |                   |                                 |    |                    |       |
| 0   | Incomplete                                                                    |                                                                                                                                                                                                                         |                                                                                                                                                                                                                                                                                                                                                                                                                                                                                                                                                                                                                                                                                                                                                                             |   |                   |                  |            |                   |          |   |                   |             |   |                   |            |   |                   |                 |   |                   |                        |   |                   |                  |   |                   |               |   |                   |                                 |    |                    |       |
| 1   | Unverified                                                                    |                                                                                                                                                                                                                         |                                                                                                                                                                                                                                                                                                                                                                                                                                                                                                                                                                                                                                                                                                                                                                             |   |                   |                  |            |                   |          |   |                   |             |   |                   |            |   |                   |                 |   |                   |                        |   |                   |                  |   |                   |               |   |                   |                                 |    |                    |       |
| 2   | Complete                                                                      |                                                                                                                                                                                                                         |                                                                                                                                                                                                                                                                                                                                                                                                                                                                                                                                                                                                                                                                                                                                                                             |   |                   |                  |            |                   |          |   |                   |             |   |                   |            |   |                   |                 |   |                   |                        |   |                   |                  |   |                   |               |   |                   |                                 |    |                    |       |

Instrument: **Medications and Clinical Trials** (medications\_and\_clinical\_trials)

[^ Collapse](#)

|     |                                                                          |                                                                                                                                                                                                                                                                                                                                                                                                                                                                                                                                                                                                                                                                                                                                                                                                                                                                                                                                                                                                                                                                     |                                                                                                                                                                                                                                                                                                                                                                                                                                                                                                                                                                                                                                                                                                                                                            |   |                  |                |   |                  |                    |   |                  |              |   |                  |            |   |                  |                       |   |                  |                               |   |                  |                         |   |                  |                      |   |                |                   |
|-----|--------------------------------------------------------------------------|---------------------------------------------------------------------------------------------------------------------------------------------------------------------------------------------------------------------------------------------------------------------------------------------------------------------------------------------------------------------------------------------------------------------------------------------------------------------------------------------------------------------------------------------------------------------------------------------------------------------------------------------------------------------------------------------------------------------------------------------------------------------------------------------------------------------------------------------------------------------------------------------------------------------------------------------------------------------------------------------------------------------------------------------------------------------|------------------------------------------------------------------------------------------------------------------------------------------------------------------------------------------------------------------------------------------------------------------------------------------------------------------------------------------------------------------------------------------------------------------------------------------------------------------------------------------------------------------------------------------------------------------------------------------------------------------------------------------------------------------------------------------------------------------------------------------------------------|---|------------------|----------------|---|------------------|--------------------|---|------------------|--------------|---|------------------|------------|---|------------------|-----------------------|---|------------------|-------------------------------|---|------------------|-------------------------|---|------------------|----------------------|---|----------------|-------------------|
| 536 | abx_antiviral                                                            | <p>Section Header: <i>The questions below refer to the first 14 days following ICU admission. Even if the patient was in the ICU for less than 14 days and was transferred to the hospital floor, continue to enter data for the full 14 days or until discharged from the hospital (whichever occurs first)</i></p> <p>Antibiotics, antivirals, and antimalarials received at any time within 14 days following ICU admission (check all that apply)-Only include meds received as part of a clinical trial if the patient definitely received the med (e.g., if they were in an open-label trial of chloroquine, or even a randomized double-blind trial of chloroquine at dose X versus chloroquine at dose Y, select chloroquine; however, if the patient was in a randomized, double-blind study of chloroquine versus placebo, do not select chloroquine)*This only refers to other antivirals, not other antibiotics. We are not collecting data on antibiotics other than the ones on the checklist (chloroquine, hydroxychloroquine, and azithromycin)</p> | <p>checkbox, Required</p> <table border="1" data-bbox="1040 111 1502 432"> <tr><td>1</td><td>abx_antiviral__1</td><td>Chloroquine</td></tr> <tr><td>2</td><td>abx_antiviral__2</td><td>Hydroxychloroquine</td></tr> <tr><td>3</td><td>abx_antiviral__3</td><td>Azithromycin</td></tr> <tr><td>4</td><td>abx_antiviral__4</td><td>Remdesivir</td></tr> <tr><td>5</td><td>abx_antiviral__5</td><td>Ribavirin</td></tr> <tr><td>6</td><td>abx_antiviral__6</td><td>Lopinavir/ritonavir (Kaletra)</td></tr> <tr><td>7</td><td>abx_antiviral__7</td><td>Other antiviral*</td></tr> <tr><td>8</td><td>abx_antiviral__8</td><td>None of the above</td></tr> </table> <p>Field Annotation: @NONEOFTHEABOVE=8</p>                                                   | 1 | abx_antiviral__1 | Chloroquine    | 2 | abx_antiviral__2 | Hydroxychloroquine | 3 | abx_antiviral__3 | Azithromycin | 4 | abx_antiviral__4 | Remdesivir | 5 | abx_antiviral__5 | Ribavirin             | 6 | abx_antiviral__6 | Lopinavir/ritonavir (Kaletra) | 7 | abx_antiviral__7 | Other antiviral*        | 8 | abx_antiviral__8 | None of the above    |   |                |                   |
| 1   | abx_antiviral__1                                                         | Chloroquine                                                                                                                                                                                                                                                                                                                                                                                                                                                                                                                                                                                                                                                                                                                                                                                                                                                                                                                                                                                                                                                         |                                                                                                                                                                                                                                                                                                                                                                                                                                                                                                                                                                                                                                                                                                                                                            |   |                  |                |   |                  |                    |   |                  |              |   |                  |            |   |                  |                       |   |                  |                               |   |                  |                         |   |                  |                      |   |                |                   |
| 2   | abx_antiviral__2                                                         | Hydroxychloroquine                                                                                                                                                                                                                                                                                                                                                                                                                                                                                                                                                                                                                                                                                                                                                                                                                                                                                                                                                                                                                                                  |                                                                                                                                                                                                                                                                                                                                                                                                                                                                                                                                                                                                                                                                                                                                                            |   |                  |                |   |                  |                    |   |                  |              |   |                  |            |   |                  |                       |   |                  |                               |   |                  |                         |   |                  |                      |   |                |                   |
| 3   | abx_antiviral__3                                                         | Azithromycin                                                                                                                                                                                                                                                                                                                                                                                                                                                                                                                                                                                                                                                                                                                                                                                                                                                                                                                                                                                                                                                        |                                                                                                                                                                                                                                                                                                                                                                                                                                                                                                                                                                                                                                                                                                                                                            |   |                  |                |   |                  |                    |   |                  |              |   |                  |            |   |                  |                       |   |                  |                               |   |                  |                         |   |                  |                      |   |                |                   |
| 4   | abx_antiviral__4                                                         | Remdesivir                                                                                                                                                                                                                                                                                                                                                                                                                                                                                                                                                                                                                                                                                                                                                                                                                                                                                                                                                                                                                                                          |                                                                                                                                                                                                                                                                                                                                                                                                                                                                                                                                                                                                                                                                                                                                                            |   |                  |                |   |                  |                    |   |                  |              |   |                  |            |   |                  |                       |   |                  |                               |   |                  |                         |   |                  |                      |   |                |                   |
| 5   | abx_antiviral__5                                                         | Ribavirin                                                                                                                                                                                                                                                                                                                                                                                                                                                                                                                                                                                                                                                                                                                                                                                                                                                                                                                                                                                                                                                           |                                                                                                                                                                                                                                                                                                                                                                                                                                                                                                                                                                                                                                                                                                                                                            |   |                  |                |   |                  |                    |   |                  |              |   |                  |            |   |                  |                       |   |                  |                               |   |                  |                         |   |                  |                      |   |                |                   |
| 6   | abx_antiviral__6                                                         | Lopinavir/ritonavir (Kaletra)                                                                                                                                                                                                                                                                                                                                                                                                                                                                                                                                                                                                                                                                                                                                                                                                                                                                                                                                                                                                                                       |                                                                                                                                                                                                                                                                                                                                                                                                                                                                                                                                                                                                                                                                                                                                                            |   |                  |                |   |                  |                    |   |                  |              |   |                  |            |   |                  |                       |   |                  |                               |   |                  |                         |   |                  |                      |   |                |                   |
| 7   | abx_antiviral__7                                                         | Other antiviral*                                                                                                                                                                                                                                                                                                                                                                                                                                                                                                                                                                                                                                                                                                                                                                                                                                                                                                                                                                                                                                                    |                                                                                                                                                                                                                                                                                                                                                                                                                                                                                                                                                                                                                                                                                                                                                            |   |                  |                |   |                  |                    |   |                  |              |   |                  |            |   |                  |                       |   |                  |                               |   |                  |                         |   |                  |                      |   |                |                   |
| 8   | abx_antiviral__8                                                         | None of the above                                                                                                                                                                                                                                                                                                                                                                                                                                                                                                                                                                                                                                                                                                                                                                                                                                                                                                                                                                                                                                                   |                                                                                                                                                                                                                                                                                                                                                                                                                                                                                                                                                                                                                                                                                                                                                            |   |                  |                |   |                  |                    |   |                  |              |   |                  |            |   |                  |                       |   |                  |                               |   |                  |                         |   |                  |                      |   |                |                   |
| 537 | date_chloroquine<br>Show the field ONLY if: [abx_antiviral(1)] = '1'     | Enter the date chloroquine was initiatedIf initiated prior to ICU Day1, enter the date for ICU Day1                                                                                                                                                                                                                                                                                                                                                                                                                                                                                                                                                                                                                                                                                                                                                                                                                                                                                                                                                                 | text (date_mdy), Required                                                                                                                                                                                                                                                                                                                                                                                                                                                                                                                                                                                                                                                                                                                                  |   |                  |                |   |                  |                    |   |                  |              |   |                  |            |   |                  |                       |   |                  |                               |   |                  |                         |   |                  |                      |   |                |                   |
| 538 | date_hydroxy<br>Show the field ONLY if: [abx_antiviral(2)] = '1'         | Enter the date hydroxychloroquine was initiatedIf initiated prior to ICU Day1, enter the date for ICU Day1                                                                                                                                                                                                                                                                                                                                                                                                                                                                                                                                                                                                                                                                                                                                                                                                                                                                                                                                                          | text (date_mdy), Required                                                                                                                                                                                                                                                                                                                                                                                                                                                                                                                                                                                                                                                                                                                                  |   |                  |                |   |                  |                    |   |                  |              |   |                  |            |   |                  |                       |   |                  |                               |   |                  |                         |   |                  |                      |   |                |                   |
| 539 | date_azithro<br>Show the field ONLY if: [abx_antiviral(3)] = '1'         | Enter the date azithromycin was initiatedIf initiated prior to ICU Day1, enter the date for ICU Day1                                                                                                                                                                                                                                                                                                                                                                                                                                                                                                                                                                                                                                                                                                                                                                                                                                                                                                                                                                | text (date_mdy), Required                                                                                                                                                                                                                                                                                                                                                                                                                                                                                                                                                                                                                                                                                                                                  |   |                  |                |   |                  |                    |   |                  |              |   |                  |            |   |                  |                       |   |                  |                               |   |                  |                         |   |                  |                      |   |                |                   |
| 540 | date_remdesivir<br>Show the field ONLY if: [abx_antiviral(4)] = '1'      | Enter the date remdesivir was initiatedIf initiated prior to ICU Day1, enter the date for ICU Day1                                                                                                                                                                                                                                                                                                                                                                                                                                                                                                                                                                                                                                                                                                                                                                                                                                                                                                                                                                  | text (date_mdy), Required                                                                                                                                                                                                                                                                                                                                                                                                                                                                                                                                                                                                                                                                                                                                  |   |                  |                |   |                  |                    |   |                  |              |   |                  |            |   |                  |                       |   |                  |                               |   |                  |                         |   |                  |                      |   |                |                   |
| 541 | date_ribavirin<br>Show the field ONLY if: [abx_antiviral(5)] = '1'       | Enter the date ribavirin was initiatedIf initiated prior to ICU Day1, enter the date for ICU Day1                                                                                                                                                                                                                                                                                                                                                                                                                                                                                                                                                                                                                                                                                                                                                                                                                                                                                                                                                                   | text (date_mdy), Required                                                                                                                                                                                                                                                                                                                                                                                                                                                                                                                                                                                                                                                                                                                                  |   |                  |                |   |                  |                    |   |                  |              |   |                  |            |   |                  |                       |   |                  |                               |   |                  |                         |   |                  |                      |   |                |                   |
| 542 | date_kaletra<br>Show the field ONLY if: [abx_antiviral(6)] = '1'         | Enter the date lopinavir/ritonavir (Kaletra) was initiatedIf initiated prior to ICU Day1, enter the date for ICU Day1                                                                                                                                                                                                                                                                                                                                                                                                                                                                                                                                                                                                                                                                                                                                                                                                                                                                                                                                               | text (date_mdy), Required                                                                                                                                                                                                                                                                                                                                                                                                                                                                                                                                                                                                                                                                                                                                  |   |                  |                |   |                  |                    |   |                  |              |   |                  |            |   |                  |                       |   |                  |                               |   |                  |                         |   |                  |                      |   |                |                   |
| 543 | other_antiviral<br>Show the field ONLY if: [abx_antiviral(7)] = '1'      | Enter the other antiviral                                                                                                                                                                                                                                                                                                                                                                                                                                                                                                                                                                                                                                                                                                                                                                                                                                                                                                                                                                                                                                           | text, Required                                                                                                                                                                                                                                                                                                                                                                                                                                                                                                                                                                                                                                                                                                                                             |   |                  |                |   |                  |                    |   |                  |              |   |                  |            |   |                  |                       |   |                  |                               |   |                  |                         |   |                  |                      |   |                |                   |
| 544 | date_other_antiviral<br>Show the field ONLY if: [abx_antiviral(7)] = '1' | Enter the date the other antiviral was initiatedIf initiated prior to ICU Day1, enter the date for ICU Day1                                                                                                                                                                                                                                                                                                                                                                                                                                                                                                                                                                                                                                                                                                                                                                                                                                                                                                                                                         | text (date_mdy), Required                                                                                                                                                                                                                                                                                                                                                                                                                                                                                                                                                                                                                                                                                                                                  |   |                  |                |   |                  |                    |   |                  |              |   |                  |            |   |                  |                       |   |                  |                               |   |                  |                         |   |                  |                      |   |                |                   |
| 545 | anti_inflam                                                              | <p>Anti-inflammatory medications received at any time within 14 days following ICU admission (check all that apply)Include meds received as part of a clinical trial as long as the patient definitely received the med (i.e., do not include drug "X" if the patient was in a randomized, double-blind study of drug "X" versus placebo)Do not include acetaminophen (Tylenol) as an "other anti-inflammatory" agent</p>                                                                                                                                                                                                                                                                                                                                                                                                                                                                                                                                                                                                                                           | <p>checkbox, Required</p> <table border="1" data-bbox="1040 1440 1461 1793"> <tr><td>1</td><td>anti_inflam__1</td><td>Corticosteroid</td></tr> <tr><td>2</td><td>anti_inflam__2</td><td>NSAID</td></tr> <tr><td>3</td><td>anti_inflam__3</td><td>Aspirin</td></tr> <tr><td>4</td><td>anti_inflam__4</td><td>Statin</td></tr> <tr><td>5</td><td>anti_inflam__5</td><td>Tocilizumab (Actemra)</td></tr> <tr><td>6</td><td>anti_inflam__6</td><td>Other IL-6 antagonist</td></tr> <tr><td>7</td><td>anti_inflam__7</td><td>Other anti-inflammatory</td></tr> <tr><td>8</td><td>anti_inflam__8</td><td>Vitamin C (IV or PO)</td></tr> <tr><td>9</td><td>anti_inflam__9</td><td>None of the above</td></tr> </table> <p>Field Annotation: @NONEOFTHEABOVE=9</p> | 1 | anti_inflam__1   | Corticosteroid | 2 | anti_inflam__2   | NSAID              | 3 | anti_inflam__3   | Aspirin      | 4 | anti_inflam__4   | Statin     | 5 | anti_inflam__5   | Tocilizumab (Actemra) | 6 | anti_inflam__6   | Other IL-6 antagonist         | 7 | anti_inflam__7   | Other anti-inflammatory | 8 | anti_inflam__8   | Vitamin C (IV or PO) | 9 | anti_inflam__9 | None of the above |
| 1   | anti_inflam__1                                                           | Corticosteroid                                                                                                                                                                                                                                                                                                                                                                                                                                                                                                                                                                                                                                                                                                                                                                                                                                                                                                                                                                                                                                                      |                                                                                                                                                                                                                                                                                                                                                                                                                                                                                                                                                                                                                                                                                                                                                            |   |                  |                |   |                  |                    |   |                  |              |   |                  |            |   |                  |                       |   |                  |                               |   |                  |                         |   |                  |                      |   |                |                   |
| 2   | anti_inflam__2                                                           | NSAID                                                                                                                                                                                                                                                                                                                                                                                                                                                                                                                                                                                                                                                                                                                                                                                                                                                                                                                                                                                                                                                               |                                                                                                                                                                                                                                                                                                                                                                                                                                                                                                                                                                                                                                                                                                                                                            |   |                  |                |   |                  |                    |   |                  |              |   |                  |            |   |                  |                       |   |                  |                               |   |                  |                         |   |                  |                      |   |                |                   |
| 3   | anti_inflam__3                                                           | Aspirin                                                                                                                                                                                                                                                                                                                                                                                                                                                                                                                                                                                                                                                                                                                                                                                                                                                                                                                                                                                                                                                             |                                                                                                                                                                                                                                                                                                                                                                                                                                                                                                                                                                                                                                                                                                                                                            |   |                  |                |   |                  |                    |   |                  |              |   |                  |            |   |                  |                       |   |                  |                               |   |                  |                         |   |                  |                      |   |                |                   |
| 4   | anti_inflam__4                                                           | Statin                                                                                                                                                                                                                                                                                                                                                                                                                                                                                                                                                                                                                                                                                                                                                                                                                                                                                                                                                                                                                                                              |                                                                                                                                                                                                                                                                                                                                                                                                                                                                                                                                                                                                                                                                                                                                                            |   |                  |                |   |                  |                    |   |                  |              |   |                  |            |   |                  |                       |   |                  |                               |   |                  |                         |   |                  |                      |   |                |                   |
| 5   | anti_inflam__5                                                           | Tocilizumab (Actemra)                                                                                                                                                                                                                                                                                                                                                                                                                                                                                                                                                                                                                                                                                                                                                                                                                                                                                                                                                                                                                                               |                                                                                                                                                                                                                                                                                                                                                                                                                                                                                                                                                                                                                                                                                                                                                            |   |                  |                |   |                  |                    |   |                  |              |   |                  |            |   |                  |                       |   |                  |                               |   |                  |                         |   |                  |                      |   |                |                   |
| 6   | anti_inflam__6                                                           | Other IL-6 antagonist                                                                                                                                                                                                                                                                                                                                                                                                                                                                                                                                                                                                                                                                                                                                                                                                                                                                                                                                                                                                                                               |                                                                                                                                                                                                                                                                                                                                                                                                                                                                                                                                                                                                                                                                                                                                                            |   |                  |                |   |                  |                    |   |                  |              |   |                  |            |   |                  |                       |   |                  |                               |   |                  |                         |   |                  |                      |   |                |                   |
| 7   | anti_inflam__7                                                           | Other anti-inflammatory                                                                                                                                                                                                                                                                                                                                                                                                                                                                                                                                                                                                                                                                                                                                                                                                                                                                                                                                                                                                                                             |                                                                                                                                                                                                                                                                                                                                                                                                                                                                                                                                                                                                                                                                                                                                                            |   |                  |                |   |                  |                    |   |                  |              |   |                  |            |   |                  |                       |   |                  |                               |   |                  |                         |   |                  |                      |   |                |                   |
| 8   | anti_inflam__8                                                           | Vitamin C (IV or PO)                                                                                                                                                                                                                                                                                                                                                                                                                                                                                                                                                                                                                                                                                                                                                                                                                                                                                                                                                                                                                                                |                                                                                                                                                                                                                                                                                                                                                                                                                                                                                                                                                                                                                                                                                                                                                            |   |                  |                |   |                  |                    |   |                  |              |   |                  |            |   |                  |                       |   |                  |                               |   |                  |                         |   |                  |                      |   |                |                   |
| 9   | anti_inflam__9                                                           | None of the above                                                                                                                                                                                                                                                                                                                                                                                                                                                                                                                                                                                                                                                                                                                                                                                                                                                                                                                                                                                                                                                   |                                                                                                                                                                                                                                                                                                                                                                                                                                                                                                                                                                                                                                                                                                                                                            |   |                  |                |   |                  |                    |   |                  |              |   |                  |            |   |                  |                       |   |                  |                               |   |                  |                         |   |                  |                      |   |                |                   |
| 546 | steroid_name_dose<br>Show the field ONLY if: [anti_inflam(1)] = '1'      | Enter the name and initial cumulative daily dose of the corticosteroidFor example, if a patient was started on methylprednisolone 125mg twice per day, enter, "methylprednisolone 250 mg"                                                                                                                                                                                                                                                                                                                                                                                                                                                                                                                                                                                                                                                                                                                                                                                                                                                                           | text, Required                                                                                                                                                                                                                                                                                                                                                                                                                                                                                                                                                                                                                                                                                                                                             |   |                  |                |   |                  |                    |   |                  |              |   |                  |            |   |                  |                       |   |                  |                               |   |                  |                         |   |                  |                      |   |                |                   |

|     |                                                                              |                                                                                                                                                                                                                                                                                      |                                                                                                                                                                                                                                                                                                                                                                                                                                                                                                                                    |   |                     |                         |   |                     |                                          |   |                     |                            |   |                     |                 |   |                     |                   |
|-----|------------------------------------------------------------------------------|--------------------------------------------------------------------------------------------------------------------------------------------------------------------------------------------------------------------------------------------------------------------------------------|------------------------------------------------------------------------------------------------------------------------------------------------------------------------------------------------------------------------------------------------------------------------------------------------------------------------------------------------------------------------------------------------------------------------------------------------------------------------------------------------------------------------------------|---|---------------------|-------------------------|---|---------------------|------------------------------------------|---|---------------------|----------------------------|---|---------------------|-----------------|---|---------------------|-------------------|
| 547 | date_steroid<br>Show the field ONLY if:<br>[anti_inflam(1)] = '1'            | Enter the date the corticosteroid was initiatedIf initiated prior to ICU Day1, enter the date for ICU Day1                                                                                                                                                                           | text (date_mdy), Required                                                                                                                                                                                                                                                                                                                                                                                                                                                                                                          |   |                     |                         |   |                     |                                          |   |                     |                            |   |                     |                 |   |                     |                   |
| 548 | date_nsaid<br>Show the field ONLY if:<br>[anti_inflam(2)] = '1'              | Enter the date the NSAID was initiatedIf initiated prior to ICU Day1, enter the date for ICU Day1                                                                                                                                                                                    | text (date_mdy), Required                                                                                                                                                                                                                                                                                                                                                                                                                                                                                                          |   |                     |                         |   |                     |                                          |   |                     |                            |   |                     |                 |   |                     |                   |
| 549 | date_aspirin<br>Show the field ONLY if:<br>[anti_inflam(3)] = '1'            | Enter the date the aspirin was initiatedIf initiated prior to ICU Day1, enter the date for ICU Day1                                                                                                                                                                                  | text (date_mdy), Required                                                                                                                                                                                                                                                                                                                                                                                                                                                                                                          |   |                     |                         |   |                     |                                          |   |                     |                            |   |                     |                 |   |                     |                   |
| 550 | date_statin<br>Show the field ONLY if:<br>[anti_inflam(4)] = '1'             | Enter the date the statin was initiatedIf initiated prior to ICU Day1, enter the date for ICU Day1                                                                                                                                                                                   | text (date_mdy), Required                                                                                                                                                                                                                                                                                                                                                                                                                                                                                                          |   |                     |                         |   |                     |                                          |   |                     |                            |   |                     |                 |   |                     |                   |
| 551 | date_toci<br>Show the field ONLY if:<br>[anti_inflam(5)] = '1'               | Enter the date the tocilizumab was initiatedIf initiated prior to ICU Day1, enter the date for ICU Day1                                                                                                                                                                              | text (date_mdy), Required                                                                                                                                                                                                                                                                                                                                                                                                                                                                                                          |   |                     |                         |   |                     |                                          |   |                     |                            |   |                     |                 |   |                     |                   |
| 552 | date_other_il_6<br>Show the field ONLY if:<br>[anti_inflam(6)] = '1'         | Enter the date the other IL-6 antagonist was initiatedIf initiated prior to ICU Day1, enter the date for ICU Day1                                                                                                                                                                    | text (date_mdy), Required                                                                                                                                                                                                                                                                                                                                                                                                                                                                                                          |   |                     |                         |   |                     |                                          |   |                     |                            |   |                     |                 |   |                     |                   |
| 553 | other_anti_inflamm<br>Show the field ONLY if:<br>[anti_inflam(7)] = '1'      | Enter the other anti-inflammatory medication                                                                                                                                                                                                                                         | text, Required                                                                                                                                                                                                                                                                                                                                                                                                                                                                                                                     |   |                     |                         |   |                     |                                          |   |                     |                            |   |                     |                 |   |                     |                   |
| 554 | date_other_anti_inflamm<br>Show the field ONLY if:<br>[anti_inflam(7)] = '1' | Enter the date the other anti-inflammatory medication was initiatedIf initiated prior to ICU Day1, enter the date for ICU Day1                                                                                                                                                       | text (date_mdy), Required                                                                                                                                                                                                                                                                                                                                                                                                                                                                                                          |   |                     |                         |   |                     |                                          |   |                     |                            |   |                     |                 |   |                     |                   |
| 555 | date_vit_c<br>Show the field ONLY if:<br>[anti_inflam(8)] = '1'              | Enter the date the vitamin C was initiatedIf initiated prior to ICU Day1, enter the date for ICU Day1                                                                                                                                                                                | text (date_mdy), Required                                                                                                                                                                                                                                                                                                                                                                                                                                                                                                          |   |                     |                         |   |                     |                                          |   |                     |                            |   |                     |                 |   |                     |                   |
| 556 | ards_meds_interv                                                             | ARDS/hypoxemia-specific medications/interventions received at any time within 14 days following ICU admission (check all that apply)*Includes cisatracurium (Nimbex) and others, but do not include short acting paralytics (e.g., rocuronium) used only for induction of intubation | checkbox, Required<br><table border="1"> <tr> <td>1</td> <td>ards_meds_interv__1</td> <td>Neuromuscular blockade*</td> </tr> <tr> <td>2</td> <td>ards_meds_interv__2</td> <td>Inhaled epoprostenol (Veletri or Flolan)</td> </tr> <tr> <td>3</td> <td>ards_meds_interv__3</td> <td>Inhaled nitric oxide (iNO)</td> </tr> <tr> <td>4</td> <td>ards_meds_interv__4</td> <td>Proned position</td> </tr> <tr> <td>5</td> <td>ards_meds_interv__5</td> <td>None of the above</td> </tr> </table><br>Field Annotation: @NONEOFTHEABOVE=5 | 1 | ards_meds_interv__1 | Neuromuscular blockade* | 2 | ards_meds_interv__2 | Inhaled epoprostenol (Veletri or Flolan) | 3 | ards_meds_interv__3 | Inhaled nitric oxide (iNO) | 4 | ards_meds_interv__4 | Proned position | 5 | ards_meds_interv__5 | None of the above |
| 1   | ards_meds_interv__1                                                          | Neuromuscular blockade*                                                                                                                                                                                                                                                              |                                                                                                                                                                                                                                                                                                                                                                                                                                                                                                                                    |   |                     |                         |   |                     |                                          |   |                     |                            |   |                     |                 |   |                     |                   |
| 2   | ards_meds_interv__2                                                          | Inhaled epoprostenol (Veletri or Flolan)                                                                                                                                                                                                                                             |                                                                                                                                                                                                                                                                                                                                                                                                                                                                                                                                    |   |                     |                         |   |                     |                                          |   |                     |                            |   |                     |                 |   |                     |                   |
| 3   | ards_meds_interv__3                                                          | Inhaled nitric oxide (iNO)                                                                                                                                                                                                                                                           |                                                                                                                                                                                                                                                                                                                                                                                                                                                                                                                                    |   |                     |                         |   |                     |                                          |   |                     |                            |   |                     |                 |   |                     |                   |
| 4   | ards_meds_interv__4                                                          | Proned position                                                                                                                                                                                                                                                                      |                                                                                                                                                                                                                                                                                                                                                                                                                                                                                                                                    |   |                     |                         |   |                     |                                          |   |                     |                            |   |                     |                 |   |                     |                   |
| 5   | ards_meds_interv__5                                                          | None of the above                                                                                                                                                                                                                                                                    |                                                                                                                                                                                                                                                                                                                                                                                                                                                                                                                                    |   |                     |                         |   |                     |                                          |   |                     |                            |   |                     |                 |   |                     |                   |
| 557 | date_neuromus<br>Show the field ONLY if:<br>[ards_meds_interv(1)] = '1'      | Enter the date the neuromuscular blockade was initiatedIf initiated prior to ICU Day1, enter the date for ICU Day1                                                                                                                                                                   | text (date_mdy), Required                                                                                                                                                                                                                                                                                                                                                                                                                                                                                                          |   |                     |                         |   |                     |                                          |   |                     |                            |   |                     |                 |   |                     |                   |
| 558 | date_inh_epo<br>Show the field ONLY if:<br>[ards_meds_interv(2)] = '1'       | Enter the date inhaled epoprostenol (Veletri or Flolan) was initiatedIf initiated prior to ICU Day1, enter the date for ICU Day1                                                                                                                                                     | text (date_mdy), Required                                                                                                                                                                                                                                                                                                                                                                                                                                                                                                          |   |                     |                         |   |                     |                                          |   |                     |                            |   |                     |                 |   |                     |                   |
| 559 | date_ino<br>Show the field ONLY if:<br>[ards_meds_interv(3)] = '1'           | Enter the date the inhaled nitric oxide (iNO) was initiatedIf initiated prior to ICU Day1, enter the date for ICU Day1                                                                                                                                                               | text (date_mdy), Required                                                                                                                                                                                                                                                                                                                                                                                                                                                                                                          |   |                     |                         |   |                     |                                          |   |                     |                            |   |                     |                 |   |                     |                   |
| 560 | proned_date<br>Show the field ONLY if:<br>[ards_meds_interv(4)] = '1'        | Enter the date the patient was first proned                                                                                                                                                                                                                                          | text (date_mdy), Required                                                                                                                                                                                                                                                                                                                                                                                                                                                                                                          |   |                     |                         |   |                     |                                          |   |                     |                            |   |                     |                 |   |                     |                   |

|     |                                                                  |                                                                                                                                                                                                                                                                                                                                                                                                                                                                                                                                                                                                                                                                                                                                                                                                                                                                                                                                                                                                                                                                      |                                                                                                                                                                                                                                                                                                                                                                                                                                                              |   |                  |                    |    |                  |                                  |   |                  |                        |   |                  |                                      |   |                  |                   |
|-----|------------------------------------------------------------------|----------------------------------------------------------------------------------------------------------------------------------------------------------------------------------------------------------------------------------------------------------------------------------------------------------------------------------------------------------------------------------------------------------------------------------------------------------------------------------------------------------------------------------------------------------------------------------------------------------------------------------------------------------------------------------------------------------------------------------------------------------------------------------------------------------------------------------------------------------------------------------------------------------------------------------------------------------------------------------------------------------------------------------------------------------------------|--------------------------------------------------------------------------------------------------------------------------------------------------------------------------------------------------------------------------------------------------------------------------------------------------------------------------------------------------------------------------------------------------------------------------------------------------------------|---|------------------|--------------------|----|------------------|----------------------------------|---|------------------|------------------------|---|------------------|--------------------------------------|---|------------------|-------------------|
| 561 | other_meds                                                       | Other medications received at any time within 14 days following ICU admission (check all that apply)Include meds received as part of a clinical trial as long as the patient definitely received the med*ACE-Is include lisinopril, fosinopril, captopril, and others*ARBs include losartan, valsartan, irbesartan, and others**Systemic tPA only (does not apply to tPA infused into indwelling catheters or locally delivered intra-arterial tPA used for stroke)                                                                                                                                                                                                                                                                                                                                                                                                                                                                                                                                                                                                  | checkbox, Required<br><table border="1"> <tr> <td>1</td> <td>other_meds__1</td> <td>Convalescent serum</td> </tr> <tr> <td>2</td> <td>other_meds__2</td> <td>ACE-I*</td> </tr> <tr> <td>3</td> <td>other_meds__3</td> <td>ARB*</td> </tr> <tr> <td>4</td> <td>other_meds__4</td> <td>tissue Plasminogen Activator (tPA)**</td> </tr> <tr> <td>5</td> <td>other_meds__5</td> <td>None of the above</td> </tr> </table><br>Field Annotation: @NONEOFTHEABOVE=5 | 1 | other_meds__1    | Convalescent serum | 2  | other_meds__2    | ACE-I*                           | 3 | other_meds__3    | ARB*                   | 4 | other_meds__4    | tissue Plasminogen Activator (tPA)** | 5 | other_meds__5    | None of the above |
| 1   | other_meds__1                                                    | Convalescent serum                                                                                                                                                                                                                                                                                                                                                                                                                                                                                                                                                                                                                                                                                                                                                                                                                                                                                                                                                                                                                                                   |                                                                                                                                                                                                                                                                                                                                                                                                                                                              |   |                  |                    |    |                  |                                  |   |                  |                        |   |                  |                                      |   |                  |                   |
| 2   | other_meds__2                                                    | ACE-I*                                                                                                                                                                                                                                                                                                                                                                                                                                                                                                                                                                                                                                                                                                                                                                                                                                                                                                                                                                                                                                                               |                                                                                                                                                                                                                                                                                                                                                                                                                                                              |   |                  |                    |    |                  |                                  |   |                  |                        |   |                  |                                      |   |                  |                   |
| 3   | other_meds__3                                                    | ARB*                                                                                                                                                                                                                                                                                                                                                                                                                                                                                                                                                                                                                                                                                                                                                                                                                                                                                                                                                                                                                                                                 |                                                                                                                                                                                                                                                                                                                                                                                                                                                              |   |                  |                    |    |                  |                                  |   |                  |                        |   |                  |                                      |   |                  |                   |
| 4   | other_meds__4                                                    | tissue Plasminogen Activator (tPA)**                                                                                                                                                                                                                                                                                                                                                                                                                                                                                                                                                                                                                                                                                                                                                                                                                                                                                                                                                                                                                                 |                                                                                                                                                                                                                                                                                                                                                                                                                                                              |   |                  |                    |    |                  |                                  |   |                  |                        |   |                  |                                      |   |                  |                   |
| 5   | other_meds__5                                                    | None of the above                                                                                                                                                                                                                                                                                                                                                                                                                                                                                                                                                                                                                                                                                                                                                                                                                                                                                                                                                                                                                                                    |                                                                                                                                                                                                                                                                                                                                                                                                                                                              |   |                  |                    |    |                  |                                  |   |                  |                        |   |                  |                                      |   |                  |                   |
| 562 | date_conv_serum<br>Show the field ONLY if: [other_meds(1)] = '1' | Enter the date the convalescent serum was initiatedIf initiated prior to ICU Day1, enter the date for ICU Day1                                                                                                                                                                                                                                                                                                                                                                                                                                                                                                                                                                                                                                                                                                                                                                                                                                                                                                                                                       | text (date_mdy), Required                                                                                                                                                                                                                                                                                                                                                                                                                                    |   |                  |                    |    |                  |                                  |   |                  |                        |   |                  |                                      |   |                  |                   |
| 563 | date_ace_i<br>Show the field ONLY if: [other_meds(2)] = '1'      | Enter the date the ACE-I was initiatedIf initiated prior to ICU Day1, enter the date for ICU Day1                                                                                                                                                                                                                                                                                                                                                                                                                                                                                                                                                                                                                                                                                                                                                                                                                                                                                                                                                                    | text (date_mdy), Required                                                                                                                                                                                                                                                                                                                                                                                                                                    |   |                  |                    |    |                  |                                  |   |                  |                        |   |                  |                                      |   |                  |                   |
| 564 | date_arb<br>Show the field ONLY if: [other_meds(3)] = '1'        | Enter the date the ARB was initiatedIf initiated prior to ICU Day1, enter the date for ICU Day1                                                                                                                                                                                                                                                                                                                                                                                                                                                                                                                                                                                                                                                                                                                                                                                                                                                                                                                                                                      | text (date_mdy), Required                                                                                                                                                                                                                                                                                                                                                                                                                                    |   |                  |                    |    |                  |                                  |   |                  |                        |   |                  |                                      |   |                  |                   |
| 565 | date_tpa<br>Show the field ONLY if: [other_meds(4)] = '1'        | Enter the date the tPA was initiatedIf initiated prior to ICU Day1, enter the date for ICU Day1                                                                                                                                                                                                                                                                                                                                                                                                                                                                                                                                                                                                                                                                                                                                                                                                                                                                                                                                                                      | text (date_mdy), Required                                                                                                                                                                                                                                                                                                                                                                                                                                    |   |                  |                    |    |                  |                                  |   |                  |                        |   |                  |                                      |   |                  |                   |
| 566 | anticoag                                                         | Therapeutic anticoagulation received at any time within 14 days following ICU admission?Do not include DVT prophylaxis (e.g., unfractionated heparin 5,000 units SC or lovenox 30-40 mg SC)In patients receiving anticoagulation prior to ICU or hospital admission, continuation of this anticoagulation or conversion to an alternative therapeutic type means the answer to this question is, "Yes", and the date entered for anticoagulation initiation (for the following question) should be the date of ICU admission. Therapeutic anticoagulation includes any of the following categories:1) Continuous drips (infusions) of heparin, argatroban, or bilvalirudin2) Subcutaneous regimens:Enoxaparin (Lovenox) 1mg/kg twice per dayEnoxaparin (Lovenox) 1.5mg/kg once per dayDalteparin (Fragmin) 150-200 units/kg once per dayDalteparin (Fragmin) 100 units/kg twice per dayFondaparinux (Aristra) at doses of 5mg or more daily3) Oral anticoagulants: warfarin (Coumadin), apixaban (Eliquis), rivaroxaban (Xarelto), edoxaban, or dabigatran (Pradaxa) | yesno, Required<br><table border="1"> <tr> <td>1</td> <td>Yes</td> </tr> <tr> <td>0</td> <td>No</td> </tr> </table>                                                                                                                                                                                                                                                                                                                                          | 1 | Yes              | 0                  | No |                  |                                  |   |                  |                        |   |                  |                                      |   |                  |                   |
| 1   | Yes                                                              |                                                                                                                                                                                                                                                                                                                                                                                                                                                                                                                                                                                                                                                                                                                                                                                                                                                                                                                                                                                                                                                                      |                                                                                                                                                                                                                                                                                                                                                                                                                                                              |   |                  |                    |    |                  |                                  |   |                  |                        |   |                  |                                      |   |                  |                   |
| 0   | No                                                               |                                                                                                                                                                                                                                                                                                                                                                                                                                                                                                                                                                                                                                                                                                                                                                                                                                                                                                                                                                                                                                                                      |                                                                                                                                                                                                                                                                                                                                                                                                                                                              |   |                  |                    |    |                  |                                  |   |                  |                        |   |                  |                                      |   |                  |                   |
| 567 | type_anticoag<br>Show the field ONLY if: [anticoag] = '1'        | Anticoagulation type                                                                                                                                                                                                                                                                                                                                                                                                                                                                                                                                                                                                                                                                                                                                                                                                                                                                                                                                                                                                                                                 | checkbox, Required<br><table border="1"> <tr> <td>1</td> <td>type_anticoag__1</td> <td>Heparin drip</td> </tr> <tr> <td>2</td> <td>type_anticoag__2</td> <td>Therapeutic enoxaparin (Lovenox)</td> </tr> <tr> <td>3</td> <td>type_anticoag__3</td> <td>Bivalirudin (Angiomax)</td> </tr> <tr> <td>4</td> <td>type_anticoag__4</td> <td>Argatroban</td> </tr> <tr> <td>5</td> <td>type_anticoag__5</td> <td>Other</td> </tr> </table>                         | 1 | type_anticoag__1 | Heparin drip       | 2  | type_anticoag__2 | Therapeutic enoxaparin (Lovenox) | 3 | type_anticoag__3 | Bivalirudin (Angiomax) | 4 | type_anticoag__4 | Argatroban                           | 5 | type_anticoag__5 | Other             |
| 1   | type_anticoag__1                                                 | Heparin drip                                                                                                                                                                                                                                                                                                                                                                                                                                                                                                                                                                                                                                                                                                                                                                                                                                                                                                                                                                                                                                                         |                                                                                                                                                                                                                                                                                                                                                                                                                                                              |   |                  |                    |    |                  |                                  |   |                  |                        |   |                  |                                      |   |                  |                   |
| 2   | type_anticoag__2                                                 | Therapeutic enoxaparin (Lovenox)                                                                                                                                                                                                                                                                                                                                                                                                                                                                                                                                                                                                                                                                                                                                                                                                                                                                                                                                                                                                                                     |                                                                                                                                                                                                                                                                                                                                                                                                                                                              |   |                  |                    |    |                  |                                  |   |                  |                        |   |                  |                                      |   |                  |                   |
| 3   | type_anticoag__3                                                 | Bivalirudin (Angiomax)                                                                                                                                                                                                                                                                                                                                                                                                                                                                                                                                                                                                                                                                                                                                                                                                                                                                                                                                                                                                                                               |                                                                                                                                                                                                                                                                                                                                                                                                                                                              |   |                  |                    |    |                  |                                  |   |                  |                        |   |                  |                                      |   |                  |                   |
| 4   | type_anticoag__4                                                 | Argatroban                                                                                                                                                                                                                                                                                                                                                                                                                                                                                                                                                                                                                                                                                                                                                                                                                                                                                                                                                                                                                                                           |                                                                                                                                                                                                                                                                                                                                                                                                                                                              |   |                  |                    |    |                  |                                  |   |                  |                        |   |                  |                                      |   |                  |                   |
| 5   | type_anticoag__5                                                 | Other                                                                                                                                                                                                                                                                                                                                                                                                                                                                                                                                                                                                                                                                                                                                                                                                                                                                                                                                                                                                                                                                |                                                                                                                                                                                                                                                                                                                                                                                                                                                              |   |                  |                    |    |                  |                                  |   |                  |                        |   |                  |                                      |   |                  |                   |
| 568 | date_anticoag<br>Show the field ONLY if: [anticoag] = '1'        | Enter the date therapeutic anticoagulation was startedIf already on therapeutic anticoagulation on arrival to the ICU, enter the date of ICU admission here                                                                                                                                                                                                                                                                                                                                                                                                                                                                                                                                                                                                                                                                                                                                                                                                                                                                                                          | text (date_mdy), Required                                                                                                                                                                                                                                                                                                                                                                                                                                    |   |                  |                    |    |                  |                                  |   |                  |                        |   |                  |                                      |   |                  |                   |

|     |                                                                          |                                                                                                                                                                                                                                                                                                                                                                                                                                                |                                                                                                                                                                                                                                                                                                                                                                                                                                                                                                                                                                                                          |   |                    |                             |            |                    |                                               |   |                    |        |   |                    |                                                |   |                    |                                                |   |                    |       |
|-----|--------------------------------------------------------------------------|------------------------------------------------------------------------------------------------------------------------------------------------------------------------------------------------------------------------------------------------------------------------------------------------------------------------------------------------------------------------------------------------------------------------------------------------|----------------------------------------------------------------------------------------------------------------------------------------------------------------------------------------------------------------------------------------------------------------------------------------------------------------------------------------------------------------------------------------------------------------------------------------------------------------------------------------------------------------------------------------------------------------------------------------------------------|---|--------------------|-----------------------------|------------|--------------------|-----------------------------------------------|---|--------------------|--------|---|--------------------|------------------------------------------------|---|--------------------|------------------------------------------------|---|--------------------|-------|
| 569 | anticoag_reason<br>Show the field ONLY if: [anticoag] = '1'              | Enter the indication(s) for anticoagulation (select all that apply)                                                                                                                                                                                                                                                                                                                                                                            | checkbox, Required<br><table border="1"> <tr> <td>1</td> <td>anticoag_reason__1</td> <td>Atrial fibrillation/flutter</td> </tr> <tr> <td>2</td> <td>anticoag_reason__2</td> <td>Acute coronary syndrome/myocardial infarction</td> </tr> <tr> <td>3</td> <td>anticoag_reason__3</td> <td>DVT/PE</td> </tr> <tr> <td>4</td> <td>anticoag_reason__4</td> <td>For extracorporeal circuit (e.g., ECMO or RRT)</td> </tr> <tr> <td>5</td> <td>anticoag_reason__5</td> <td>Hypercoagulable state associated with COVID-19</td> </tr> <tr> <td>6</td> <td>anticoag_reason__6</td> <td>Other</td> </tr> </table> | 1 | anticoag_reason__1 | Atrial fibrillation/flutter | 2          | anticoag_reason__2 | Acute coronary syndrome/myocardial infarction | 3 | anticoag_reason__3 | DVT/PE | 4 | anticoag_reason__4 | For extracorporeal circuit (e.g., ECMO or RRT) | 5 | anticoag_reason__5 | Hypercoagulable state associated with COVID-19 | 6 | anticoag_reason__6 | Other |
| 1   | anticoag_reason__1                                                       | Atrial fibrillation/flutter                                                                                                                                                                                                                                                                                                                                                                                                                    |                                                                                                                                                                                                                                                                                                                                                                                                                                                                                                                                                                                                          |   |                    |                             |            |                    |                                               |   |                    |        |   |                    |                                                |   |                    |                                                |   |                    |       |
| 2   | anticoag_reason__2                                                       | Acute coronary syndrome/myocardial infarction                                                                                                                                                                                                                                                                                                                                                                                                  |                                                                                                                                                                                                                                                                                                                                                                                                                                                                                                                                                                                                          |   |                    |                             |            |                    |                                               |   |                    |        |   |                    |                                                |   |                    |                                                |   |                    |       |
| 3   | anticoag_reason__3                                                       | DVT/PE                                                                                                                                                                                                                                                                                                                                                                                                                                         |                                                                                                                                                                                                                                                                                                                                                                                                                                                                                                                                                                                                          |   |                    |                             |            |                    |                                               |   |                    |        |   |                    |                                                |   |                    |                                                |   |                    |       |
| 4   | anticoag_reason__4                                                       | For extracorporeal circuit (e.g., ECMO or RRT)                                                                                                                                                                                                                                                                                                                                                                                                 |                                                                                                                                                                                                                                                                                                                                                                                                                                                                                                                                                                                                          |   |                    |                             |            |                    |                                               |   |                    |        |   |                    |                                                |   |                    |                                                |   |                    |       |
| 5   | anticoag_reason__5                                                       | Hypercoagulable state associated with COVID-19                                                                                                                                                                                                                                                                                                                                                                                                 |                                                                                                                                                                                                                                                                                                                                                                                                                                                                                                                                                                                                          |   |                    |                             |            |                    |                                               |   |                    |        |   |                    |                                                |   |                    |                                                |   |                    |       |
| 6   | anticoag_reason__6                                                       | Other                                                                                                                                                                                                                                                                                                                                                                                                                                          |                                                                                                                                                                                                                                                                                                                                                                                                                                                                                                                                                                                                          |   |                    |                             |            |                    |                                               |   |                    |        |   |                    |                                                |   |                    |                                                |   |                    |       |
| 570 | trial                                                                    | Enrolled in a clinical trial for COVID-19?Includes not only clinical trials of medications but any clinical trial, including devices or other interventions                                                                                                                                                                                                                                                                                    | yesno, Required<br><table border="1"> <tr> <td>1</td> <td>Yes</td> </tr> <tr> <td>0</td> <td>No</td> </tr> </table>                                                                                                                                                                                                                                                                                                                                                                                                                                                                                      | 1 | Yes                | 0                           | No         |                    |                                               |   |                    |        |   |                    |                                                |   |                    |                                                |   |                    |       |
| 1   | Yes                                                                      |                                                                                                                                                                                                                                                                                                                                                                                                                                                |                                                                                                                                                                                                                                                                                                                                                                                                                                                                                                                                                                                                          |   |                    |                             |            |                    |                                               |   |                    |        |   |                    |                                                |   |                    |                                                |   |                    |       |
| 0   | No                                                                       |                                                                                                                                                                                                                                                                                                                                                                                                                                                |                                                                                                                                                                                                                                                                                                                                                                                                                                                                                                                                                                                                          |   |                    |                             |            |                    |                                               |   |                    |        |   |                    |                                                |   |                    |                                                |   |                    |       |
| 571 | nct_number<br>Show the field ONLY if: [trial] = '1'                      | Enter the ClinicalTrials.gov Identifier, if known (otherwise enter, "N/A")-The identifier always begins with "NCT", followed by several digits (e.g., NCT12345678). Enter the entire identifier, including the "NCT". The identifier can be easily found at the top of the ClinicalTrials.gov website for the trial-FYI, the ClinicalTrials.gov webpage for the trial is a good resource to answer the subsequent questions about study design | text, Required                                                                                                                                                                                                                                                                                                                                                                                                                                                                                                                                                                                           |   |                    |                             |            |                    |                                               |   |                    |        |   |                    |                                                |   |                    |                                                |   |                    |       |
| 572 | single_arm_trial<br>Show the field ONLY if: [trial] = '1'                | Was the trial single-arm?One intervention only, with no active comparator group                                                                                                                                                                                                                                                                                                                                                                | yesno, Required<br><table border="1"> <tr> <td>1</td> <td>Yes</td> </tr> <tr> <td>0</td> <td>No</td> </tr> </table>                                                                                                                                                                                                                                                                                                                                                                                                                                                                                      | 1 | Yes                | 0                           | No         |                    |                                               |   |                    |        |   |                    |                                                |   |                    |                                                |   |                    |       |
| 1   | Yes                                                                      |                                                                                                                                                                                                                                                                                                                                                                                                                                                |                                                                                                                                                                                                                                                                                                                                                                                                                                                                                                                                                                                                          |   |                    |                             |            |                    |                                               |   |                    |        |   |                    |                                                |   |                    |                                                |   |                    |       |
| 0   | No                                                                       |                                                                                                                                                                                                                                                                                                                                                                                                                                                |                                                                                                                                                                                                                                                                                                                                                                                                                                                                                                                                                                                                          |   |                    |                             |            |                    |                                               |   |                    |        |   |                    |                                                |   |                    |                                                |   |                    |       |
| 573 | intervent_single_arm<br>Show the field ONLY if: [single_arm_trial] = '1' | What intervention did the patient receive?Be as specific as possible (e.g., drug X at X mg BID for X days)                                                                                                                                                                                                                                                                                                                                     | notes, Required                                                                                                                                                                                                                                                                                                                                                                                                                                                                                                                                                                                          |   |                    |                             |            |                    |                                               |   |                    |        |   |                    |                                                |   |                    |                                                |   |                    |       |
| 574 | noblind_tx<br>Show the field ONLY if: [single_arm_trial] = '0'           | What intervention(s) did the patient receive? Or, if unknown, what interventions were being tested?-Be as specific as possible (e.g., drug X at X mg BID for X days versus drug Y; or drug X versus placebo)-Include details on study design, including whether the study was randomized, double-blinded, and placebo-controlled                                                                                                               | notes, Required                                                                                                                                                                                                                                                                                                                                                                                                                                                                                                                                                                                          |   |                    |                             |            |                    |                                               |   |                    |        |   |                    |                                                |   |                    |                                                |   |                    |       |
| 575 | second_trial<br>Show the field ONLY if: [trial] = '1'                    | Was the patient enrolled in a second clinical trial?                                                                                                                                                                                                                                                                                                                                                                                           | yesno, Required<br><table border="1"> <tr> <td>1</td> <td>Yes</td> </tr> <tr> <td>0</td> <td>No</td> </tr> </table>                                                                                                                                                                                                                                                                                                                                                                                                                                                                                      | 1 | Yes                | 0                           | No         |                    |                                               |   |                    |        |   |                    |                                                |   |                    |                                                |   |                    |       |
| 1   | Yes                                                                      |                                                                                                                                                                                                                                                                                                                                                                                                                                                |                                                                                                                                                                                                                                                                                                                                                                                                                                                                                                                                                                                                          |   |                    |                             |            |                    |                                               |   |                    |        |   |                    |                                                |   |                    |                                                |   |                    |       |
| 0   | No                                                                       |                                                                                                                                                                                                                                                                                                                                                                                                                                                |                                                                                                                                                                                                                                                                                                                                                                                                                                                                                                                                                                                                          |   |                    |                             |            |                    |                                               |   |                    |        |   |                    |                                                |   |                    |                                                |   |                    |       |
| 576 | second_trial_details<br>Show the field ONLY if: [second_trial] = '1'     | Enter the details of the second clinical trialInclude if the trial was single- versus double-arm, if it was randomized, double-blinded, and/or placebo-controlled, and what the intervention(s) were                                                                                                                                                                                                                                           | notes, Required                                                                                                                                                                                                                                                                                                                                                                                                                                                                                                                                                                                          |   |                    |                             |            |                    |                                               |   |                    |        |   |                    |                                                |   |                    |                                                |   |                    |       |
| 577 | notes_meds                                                               | Additional notes (if any)Do not use this space to write about meds that were not asked about above                                                                                                                                                                                                                                                                                                                                             | notes                                                                                                                                                                                                                                                                                                                                                                                                                                                                                                                                                                                                    |   |                    |                             |            |                    |                                               |   |                    |        |   |                    |                                                |   |                    |                                                |   |                    |       |
| 578 | medications_and_clinical_trial_s_complete                                | Section Header: <i>Form Status</i><br>Complete?                                                                                                                                                                                                                                                                                                                                                                                                | dropdown<br><table border="1"> <tr> <td>0</td> <td>Incomplete</td> </tr> <tr> <td>1</td> <td>Unverified</td> </tr> <tr> <td>2</td> <td>Complete</td> </tr> </table>                                                                                                                                                                                                                                                                                                                                                                                                                                      | 0 | Incomplete         | 1                           | Unverified | 2                  | Complete                                      |   |                    |        |   |                    |                                                |   |                    |                                                |   |                    |       |
| 0   | Incomplete                                                               |                                                                                                                                                                                                                                                                                                                                                                                                                                                |                                                                                                                                                                                                                                                                                                                                                                                                                                                                                                                                                                                                          |   |                    |                             |            |                    |                                               |   |                    |        |   |                    |                                                |   |                    |                                                |   |                    |       |
| 1   | Unverified                                                               |                                                                                                                                                                                                                                                                                                                                                                                                                                                |                                                                                                                                                                                                                                                                                                                                                                                                                                                                                                                                                                                                          |   |                    |                             |            |                    |                                               |   |                    |        |   |                    |                                                |   |                    |                                                |   |                    |       |
| 2   | Complete                                                                 |                                                                                                                                                                                                                                                                                                                                                                                                                                                |                                                                                                                                                                                                                                                                                                                                                                                                                                                                                                                                                                                                          |   |                    |                             |            |                    |                                               |   |                    |        |   |                    |                                                |   |                    |                                                |   |                    |       |

Instrument: **Mortality and Length of Stay** (mortality\_and\_length\_of\_stay)

[^ Collapse](#)

|     |                                                                                                                                                                                                                        |                                                                                                                                                                                              |                                                                                                                                                                                                                                                                                                                                                                           |   |     |   |    |   |                                                                                                                                                                                                                        |
|-----|------------------------------------------------------------------------------------------------------------------------------------------------------------------------------------------------------------------------|----------------------------------------------------------------------------------------------------------------------------------------------------------------------------------------------|---------------------------------------------------------------------------------------------------------------------------------------------------------------------------------------------------------------------------------------------------------------------------------------------------------------------------------------------------------------------------|---|-----|---|----|---|------------------------------------------------------------------------------------------------------------------------------------------------------------------------------------------------------------------------|
| 579 | icu_discharge                                                                                                                                                                                                          | Discharged from the ICU?-If the patient died in the ICU, select "no"-Enter the date the patient was first discharged from the ICU, even if they were subsequently readmitted back to the ICU | radio, Required<br><table border="1"> <tr> <td>1</td> <td>Yes</td> </tr> <tr> <td>2</td> <td>No</td> </tr> <tr> <td>3</td> <td>N/A because the patient was in a non-ICU bed converted into an ICU bed for surge capacity, and these patients typically do not get transferred. They either die or are discharged home directly from the "non-ICU" bed</td> </tr> </table> | 1 | Yes | 2 | No | 3 | N/A because the patient was in a non-ICU bed converted into an ICU bed for surge capacity, and these patients typically do not get transferred. They either die or are discharged home directly from the "non-ICU" bed |
| 1   | Yes                                                                                                                                                                                                                    |                                                                                                                                                                                              |                                                                                                                                                                                                                                                                                                                                                                           |   |     |   |    |   |                                                                                                                                                                                                                        |
| 2   | No                                                                                                                                                                                                                     |                                                                                                                                                                                              |                                                                                                                                                                                                                                                                                                                                                                           |   |     |   |    |   |                                                                                                                                                                                                                        |
| 3   | N/A because the patient was in a non-ICU bed converted into an ICU bed for surge capacity, and these patients typically do not get transferred. They either die or are discharged home directly from the "non-ICU" bed |                                                                                                                                                                                              |                                                                                                                                                                                                                                                                                                                                                                           |   |     |   |    |   |                                                                                                                                                                                                                        |

|     |                                                                                        |                                                                                                                                                                                                                                                                                                                                                                                                                   |                                                                                                                                                                                                                                                                                                                                                                                                                                                            |   |                                           |                          |                                                                                  |                |                                                                       |   |                          |              |   |                |                |   |                |               |   |                |       |
|-----|----------------------------------------------------------------------------------------|-------------------------------------------------------------------------------------------------------------------------------------------------------------------------------------------------------------------------------------------------------------------------------------------------------------------------------------------------------------------------------------------------------------------|------------------------------------------------------------------------------------------------------------------------------------------------------------------------------------------------------------------------------------------------------------------------------------------------------------------------------------------------------------------------------------------------------------------------------------------------------------|---|-------------------------------------------|--------------------------|----------------------------------------------------------------------------------|----------------|-----------------------------------------------------------------------|---|--------------------------|--------------|---|----------------|----------------|---|----------------|---------------|---|----------------|-------|
| 580 | date_icu_discharge<br>Show the field ONLY if: [icu_discharge] = '1'                    | Date of discharge from the ICU                                                                                                                                                                                                                                                                                                                                                                                    | text (date_mdy), Required                                                                                                                                                                                                                                                                                                                                                                                                                                  |   |                                           |                          |                                                                                  |                |                                                                       |   |                          |              |   |                |                |   |                |               |   |                |       |
| 581 | mortality_status                                                                       | Hospital mortality status                                                                                                                                                                                                                                                                                                                                                                                         | radio, Required<br><table border="1"> <tr><td>1</td><td>Survived and discharged from the hospital</td></tr> <tr><td>2</td><td>Died during hospitalization</td></tr> <tr><td>3</td><td>Patient is still hospitalized at the time of data entry</td></tr> </table>                                                                                                                                                                                           | 1 | Survived and discharged from the hospital | 2                        | Died during hospitalization                                                      | 3              | Patient is still hospitalized at the time of data entry               |   |                          |              |   |                |                |   |                |               |   |                |       |
| 1   | Survived and discharged from the hospital                                              |                                                                                                                                                                                                                                                                                                                                                                                                                   |                                                                                                                                                                                                                                                                                                                                                                                                                                                            |   |                                           |                          |                                                                                  |                |                                                                       |   |                          |              |   |                |                |   |                |               |   |                |       |
| 2   | Died during hospitalization                                                            |                                                                                                                                                                                                                                                                                                                                                                                                                   |                                                                                                                                                                                                                                                                                                                                                                                                                                                            |   |                                           |                          |                                                                                  |                |                                                                       |   |                          |              |   |                |                |   |                |               |   |                |       |
| 3   | Patient is still hospitalized at the time of data entry                                |                                                                                                                                                                                                                                                                                                                                                                                                                   |                                                                                                                                                                                                                                                                                                                                                                                                                                                            |   |                                           |                          |                                                                                  |                |                                                                       |   |                          |              |   |                |                |   |                |               |   |                |       |
| 582 | date_dead<br>Show the field ONLY if: [mortality_status] = '2'                          | Date of death                                                                                                                                                                                                                                                                                                                                                                                                     | text (date_mdy), Required, Identifier                                                                                                                                                                                                                                                                                                                                                                                                                      |   |                                           |                          |                                                                                  |                |                                                                       |   |                          |              |   |                |                |   |                |               |   |                |       |
| 583 | cause_death<br>Show the field ONLY if: [mortality_status] = '2'                        | Cause(s) of death (select all that apply)                                                                                                                                                                                                                                                                                                                                                                         | checkbox, Required<br><table border="1"> <tr><td>1</td><td>cause_death__1</td><td>ARDS/respiratory failure</td></tr> <tr><td>2</td><td>cause_death__2</td><td>Heart failure</td></tr> <tr><td>3</td><td>cause_death__3</td><td>Septic shock</td></tr> <tr><td>4</td><td>cause_death__4</td><td>Kidney failure</td></tr> <tr><td>5</td><td>cause_death__5</td><td>Liver failure</td></tr> <tr><td>6</td><td>cause_death__6</td><td>Other</td></tr> </table> | 1 | cause_death__1                            | ARDS/respiratory failure | 2                                                                                | cause_death__2 | Heart failure                                                         | 3 | cause_death__3           | Septic shock | 4 | cause_death__4 | Kidney failure | 5 | cause_death__5 | Liver failure | 6 | cause_death__6 | Other |
| 1   | cause_death__1                                                                         | ARDS/respiratory failure                                                                                                                                                                                                                                                                                                                                                                                          |                                                                                                                                                                                                                                                                                                                                                                                                                                                            |   |                                           |                          |                                                                                  |                |                                                                       |   |                          |              |   |                |                |   |                |               |   |                |       |
| 2   | cause_death__2                                                                         | Heart failure                                                                                                                                                                                                                                                                                                                                                                                                     |                                                                                                                                                                                                                                                                                                                                                                                                                                                            |   |                                           |                          |                                                                                  |                |                                                                       |   |                          |              |   |                |                |   |                |               |   |                |       |
| 3   | cause_death__3                                                                         | Septic shock                                                                                                                                                                                                                                                                                                                                                                                                      |                                                                                                                                                                                                                                                                                                                                                                                                                                                            |   |                                           |                          |                                                                                  |                |                                                                       |   |                          |              |   |                |                |   |                |               |   |                |       |
| 4   | cause_death__4                                                                         | Kidney failure                                                                                                                                                                                                                                                                                                                                                                                                    |                                                                                                                                                                                                                                                                                                                                                                                                                                                            |   |                                           |                          |                                                                                  |                |                                                                       |   |                          |              |   |                |                |   |                |               |   |                |       |
| 5   | cause_death__5                                                                         | Liver failure                                                                                                                                                                                                                                                                                                                                                                                                     |                                                                                                                                                                                                                                                                                                                                                                                                                                                            |   |                                           |                          |                                                                                  |                |                                                                       |   |                          |              |   |                |                |   |                |               |   |                |       |
| 6   | cause_death__6                                                                         | Other                                                                                                                                                                                                                                                                                                                                                                                                             |                                                                                                                                                                                                                                                                                                                                                                                                                                                            |   |                                           |                          |                                                                                  |                |                                                                       |   |                          |              |   |                |                |   |                |               |   |                |       |
| 584 | cause_death_other<br>Show the field ONLY if: [cause_death(6)] = '1'                    | Enter the other cause(s) of death-Do not simply write, "cardiopulmonary arrest" or "Comfort Measures Only". Rather, provide the immediate underlying cause(s) of death in addition to those already listed above (e.g., pulmonary embolism, stroke, etc.) -Would also mention here if the patient needed life-sustaining therapy (e.g., mechanical ventilation, RRT) but that it was unavailable due to shortages | notes, Required                                                                                                                                                                                                                                                                                                                                                                                                                                            |   |                                           |                          |                                                                                  |                |                                                                       |   |                          |              |   |                |                |   |                |               |   |                |       |
| 585 | date_fu<br>Show the field ONLY if: [mortality_status] = '3'                            | Date of last follow-up                                                                                                                                                                                                                                                                                                                                                                                            | text (date_mdy), Required                                                                                                                                                                                                                                                                                                                                                                                                                                  |   |                                           |                          |                                                                                  |                |                                                                       |   |                          |              |   |                |                |   |                |               |   |                |       |
| 586 | date_dchosp<br>Show the field ONLY if: [mortality_status] = '1'                        | Date discharged from the hospital                                                                                                                                                                                                                                                                                                                                                                                 | text (date_mdy), Required                                                                                                                                                                                                                                                                                                                                                                                                                                  |   |                                           |                          |                                                                                  |                |                                                                       |   |                          |              |   |                |                |   |                |               |   |                |       |
| 587 | neuro_dc_after_cpr<br>Show the field ONLY if: [cpr] = '1' and [mortality_status] = '1' | Neurologic status at hospital discharge<br>Normal refers to patients who are alert, conscious, and have either no neurological deficits or only mild deficits<br>Severe disability refers to being dependent on others for activities of daily living due to neurological impairment                                                                                                                              | radio, Required<br><table border="1"> <tr><td>1</td><td>Normal</td></tr> <tr><td>2</td><td>Moderate disability, able to accomplish activities of daily living independently</td></tr> <tr><td>3</td><td>Severe disability, dependent on others for activities of daily living</td></tr> <tr><td>4</td><td>Coma or vegetative state</td></tr> </table>                                                                                                      | 1 | Normal                                    | 2                        | Moderate disability, able to accomplish activities of daily living independently | 3              | Severe disability, dependent on others for activities of daily living | 4 | Coma or vegetative state |              |   |                |                |   |                |               |   |                |       |
| 1   | Normal                                                                                 |                                                                                                                                                                                                                                                                                                                                                                                                                   |                                                                                                                                                                                                                                                                                                                                                                                                                                                            |   |                                           |                          |                                                                                  |                |                                                                       |   |                          |              |   |                |                |   |                |               |   |                |       |
| 2   | Moderate disability, able to accomplish activities of daily living independently       |                                                                                                                                                                                                                                                                                                                                                                                                                   |                                                                                                                                                                                                                                                                                                                                                                                                                                                            |   |                                           |                          |                                                                                  |                |                                                                       |   |                          |              |   |                |                |   |                |               |   |                |       |
| 3   | Severe disability, dependent on others for activities of daily living                  |                                                                                                                                                                                                                                                                                                                                                                                                                   |                                                                                                                                                                                                                                                                                                                                                                                                                                                            |   |                                           |                          |                                                                                  |                |                                                                       |   |                          |              |   |                |                |   |                |               |   |                |       |
| 4   | Coma or vegetative state                                                               |                                                                                                                                                                                                                                                                                                                                                                                                                   |                                                                                                                                                                                                                                                                                                                                                                                                                                                            |   |                                           |                          |                                                                                  |                |                                                                       |   |                          |              |   |                |                |   |                |               |   |                |       |
| 588 | notes_death                                                                            | Additional Notes (if any)Do NOT use this space to write about the cause of death. Cause of death should be provided above. Also, do not provide details about DNR/DNI status, comfort measures only, family meetings, etc.                                                                                                                                                                                        | notes                                                                                                                                                                                                                                                                                                                                                                                                                                                      |   |                                           |                          |                                                                                  |                |                                                                       |   |                          |              |   |                |                |   |                |               |   |                |       |
| 589 | mortality_and_length_of_stay_complete                                                  | Section Header: <i>Form Status</i><br>Complete?                                                                                                                                                                                                                                                                                                                                                                   | dropdown<br><table border="1"> <tr><td>0</td><td>Incomplete</td></tr> <tr><td>1</td><td>Unverified</td></tr> <tr><td>2</td><td>Complete</td></tr> </table>                                                                                                                                                                                                                                                                                                 | 0 | Incomplete                                | 1                        | Unverified                                                                       | 2              | Complete                                                              |   |                          |              |   |                |                |   |                |               |   |                |       |
| 0   | Incomplete                                                                             |                                                                                                                                                                                                                                                                                                                                                                                                                   |                                                                                                                                                                                                                                                                                                                                                                                                                                                            |   |                                           |                          |                                                                                  |                |                                                                       |   |                          |              |   |                |                |   |                |               |   |                |       |
| 1   | Unverified                                                                             |                                                                                                                                                                                                                                                                                                                                                                                                                   |                                                                                                                                                                                                                                                                                                                                                                                                                                                            |   |                                           |                          |                                                                                  |                |                                                                       |   |                          |              |   |                |                |   |                |               |   |                |       |
| 2   | Complete                                                                               |                                                                                                                                                                                                                                                                                                                                                                                                                   |                                                                                                                                                                                                                                                                                                                                                                                                                                                            |   |                                           |                          |                                                                                  |                |                                                                       |   |                          |              |   |                |                |   |                |               |   |                |       |

Instrument: **Additional Lab Data** (additional\_lab\_data)

[^ Collapse](#)

|     |                                                                        |                                                                                                                                                                                                                                                                                                                                 |                                                                                                                                                                                                                                                                                                                                              |   |                |   |                 |   |          |   |    |   |     |   |     |   |    |   |    |   |         |
|-----|------------------------------------------------------------------------|---------------------------------------------------------------------------------------------------------------------------------------------------------------------------------------------------------------------------------------------------------------------------------------------------------------------------------|----------------------------------------------------------------------------------------------------------------------------------------------------------------------------------------------------------------------------------------------------------------------------------------------------------------------------------------------|---|----------------|---|-----------------|---|----------|---|----|---|-----|---|-----|---|----|---|----|---|---------|
| 590 | type_blood                                                             | Section Header: <i>The questions below refer to the first 14 days following ICU admission. Even if the patient was in the ICU for less than 14 days and was transferred to the hospital floor, continue to enter data for the full 14 days or until discharged from the hospital (whichever occurs first)</i><br><br>Blood Type | radio, Required<br><table border="1"> <tr><td>1</td><td>A+</td></tr> <tr><td>2</td><td>A-</td></tr> <tr><td>3</td><td>B+</td></tr> <tr><td>4</td><td>B-</td></tr> <tr><td>5</td><td>AB+</td></tr> <tr><td>6</td><td>AB-</td></tr> <tr><td>7</td><td>O+</td></tr> <tr><td>8</td><td>O-</td></tr> <tr><td>9</td><td>Unknown</td></tr> </table> | 1 | A+             | 2 | A-              | 3 | B+       | 4 | B- | 5 | AB+ | 6 | AB- | 7 | O+ | 8 | O- | 9 | Unknown |
| 1   | A+                                                                     |                                                                                                                                                                                                                                                                                                                                 |                                                                                                                                                                                                                                                                                                                                              |   |                |   |                 |   |          |   |    |   |     |   |     |   |    |   |    |   |         |
| 2   | A-                                                                     |                                                                                                                                                                                                                                                                                                                                 |                                                                                                                                                                                                                                                                                                                                              |   |                |   |                 |   |          |   |    |   |     |   |     |   |    |   |    |   |         |
| 3   | B+                                                                     |                                                                                                                                                                                                                                                                                                                                 |                                                                                                                                                                                                                                                                                                                                              |   |                |   |                 |   |          |   |    |   |     |   |     |   |    |   |    |   |         |
| 4   | B-                                                                     |                                                                                                                                                                                                                                                                                                                                 |                                                                                                                                                                                                                                                                                                                                              |   |                |   |                 |   |          |   |    |   |     |   |     |   |    |   |    |   |         |
| 5   | AB+                                                                    |                                                                                                                                                                                                                                                                                                                                 |                                                                                                                                                                                                                                                                                                                                              |   |                |   |                 |   |          |   |    |   |     |   |     |   |    |   |    |   |         |
| 6   | AB-                                                                    |                                                                                                                                                                                                                                                                                                                                 |                                                                                                                                                                                                                                                                                                                                              |   |                |   |                 |   |          |   |    |   |     |   |     |   |    |   |    |   |         |
| 7   | O+                                                                     |                                                                                                                                                                                                                                                                                                                                 |                                                                                                                                                                                                                                                                                                                                              |   |                |   |                 |   |          |   |    |   |     |   |     |   |    |   |    |   |         |
| 8   | O-                                                                     |                                                                                                                                                                                                                                                                                                                                 |                                                                                                                                                                                                                                                                                                                                              |   |                |   |                 |   |          |   |    |   |     |   |     |   |    |   |    |   |         |
| 9   | Unknown                                                                |                                                                                                                                                                                                                                                                                                                                 |                                                                                                                                                                                                                                                                                                                                              |   |                |   |                 |   |          |   |    |   |     |   |     |   |    |   |    |   |         |
| 591 | cr_hosp_discharge<br>Show the field ONLY if: [mortality_status] = '1'  | Serum creatinine (mg/dl) on hospital discharge if none available on the day of hospital discharge, enter the value closest to hospital discharge                                                                                                                                                                                | text (number, Min: .3, Max: 10), Required                                                                                                                                                                                                                                                                                                    |   |                |   |                 |   |          |   |    |   |     |   |     |   |    |   |    |   |         |
| 592 | rrt_hosp_discharge<br>Show the field ONLY if: [mortality_status] = '1' | Dialysis-dependent on hospital discharge?                                                                                                                                                                                                                                                                                       | radio, Required<br><table border="1"> <tr><td>1</td><td>Yes - from AKI</td></tr> <tr><td>2</td><td>Yes - from ESRD</td></tr> <tr><td>3</td><td>No</td></tr> </table>                                                                                                                                                                         | 1 | Yes - from AKI | 2 | Yes - from ESRD | 3 | No       |   |    |   |     |   |     |   |    |   |    |   |         |
| 1   | Yes - from AKI                                                         |                                                                                                                                                                                                                                                                                                                                 |                                                                                                                                                                                                                                                                                                                                              |   |                |   |                 |   |          |   |    |   |     |   |     |   |    |   |    |   |         |
| 2   | Yes - from ESRD                                                        |                                                                                                                                                                                                                                                                                                                                 |                                                                                                                                                                                                                                                                                                                                              |   |                |   |                 |   |          |   |    |   |     |   |     |   |    |   |    |   |         |
| 3   | No                                                                     |                                                                                                                                                                                                                                                                                                                                 |                                                                                                                                                                                                                                                                                                                                              |   |                |   |                 |   |          |   |    |   |     |   |     |   |    |   |    |   |         |
| 593 | kidney_bx                                                              | Did the patient have a kidney biopsy performed?                                                                                                                                                                                                                                                                                 | yesno, Required<br><table border="1"> <tr><td>1</td><td>Yes</td></tr> <tr><td>0</td><td>No</td></tr> </table>                                                                                                                                                                                                                                | 1 | Yes            | 0 | No              |   |          |   |    |   |     |   |     |   |    |   |    |   |         |
| 1   | Yes                                                                    |                                                                                                                                                                                                                                                                                                                                 |                                                                                                                                                                                                                                                                                                                                              |   |                |   |                 |   |          |   |    |   |     |   |     |   |    |   |    |   |         |
| 0   | No                                                                     |                                                                                                                                                                                                                                                                                                                                 |                                                                                                                                                                                                                                                                                                                                              |   |                |   |                 |   |          |   |    |   |     |   |     |   |    |   |    |   |         |
| 594 | kidney_bx_report<br>Show the field ONLY if: [kidney_bx] = '1'          | Copy and paste the entire biopsy report Be sure to remove identifiers, like name and MRN                                                                                                                                                                                                                                        | notes, Required                                                                                                                                                                                                                                                                                                                              |   |                |   |                 |   |          |   |    |   |     |   |     |   |    |   |    |   |         |
| 595 | additional_lab_data_complete                                           | Section Header: <i>Form Status</i><br>Complete?                                                                                                                                                                                                                                                                                 | dropdown<br><table border="1"> <tr><td>0</td><td>Incomplete</td></tr> <tr><td>1</td><td>Unverified</td></tr> <tr><td>2</td><td>Complete</td></tr> </table>                                                                                                                                                                                   | 0 | Incomplete     | 1 | Unverified      | 2 | Complete |   |    |   |     |   |     |   |    |   |    |   |         |
| 0   | Incomplete                                                             |                                                                                                                                                                                                                                                                                                                                 |                                                                                                                                                                                                                                                                                                                                              |   |                |   |                 |   |          |   |    |   |     |   |     |   |    |   |    |   |         |
| 1   | Unverified                                                             |                                                                                                                                                                                                                                                                                                                                 |                                                                                                                                                                                                                                                                                                                                              |   |                |   |                 |   |          |   |    |   |     |   |     |   |    |   |    |   |         |
| 2   | Complete                                                               |                                                                                                                                                                                                                                                                                                                                 |                                                                                                                                                                                                                                                                                                                                              |   |                |   |                 |   |          |   |    |   |     |   |     |   |    |   |    |   |         |

Instrument: **Additional Data for ECMO Patients** (additional\_ecmo\_data)

[^ Collapse](#)

|     |                                                                                                                                                                                                                                                                                                                                  |                                                                                                                                                                                                                                       |                                                                                                               |   |     |   |    |
|-----|----------------------------------------------------------------------------------------------------------------------------------------------------------------------------------------------------------------------------------------------------------------------------------------------------------------------------------|---------------------------------------------------------------------------------------------------------------------------------------------------------------------------------------------------------------------------------------|---------------------------------------------------------------------------------------------------------------|---|-----|---|----|
| 596 | ecmo_fyi                                                                                                                                                                                                                                                                                                                         | This instrument is only meant for patients who initiated ECMO in the first 14 days following ICU admission. If the patient did not initiate ECMO in the first 14 days, no questions will appear below, and you may skip this section. | descriptive, Required                                                                                         |   |     |   |    |
| 597 | bicarb_b4_ecmo_2<br>Show the field ONLY if: [ecmo(1)] = '1' or [ecmo(2)] = '1' or [ecmo(3)] = '1' or [ecmo(4)] = '1' or [ecmo(5)] = '1' or [ecmo(6)] = '1' or [ecmo(7)] = '1' or [ecmo_2(1)] = '1' or [ecmo_2(2)] = '1' or [ecmo_2(3)] = '1' or [ecmo_2(4)] = '1' or [ecmo_2(5)] = '1' or [ecmo_2(6)] = '1' or [ecmo_2(7)] = '1' | Was sodium bicarbonate administered intravenously (either as a drip or bolus infusion) within 24 hours prior to ECMO cannulation?                                                                                                     | yesno, Required<br><table border="1"> <tr><td>1</td><td>Yes</td></tr> <tr><td>0</td><td>No</td></tr> </table> | 1 | Yes | 0 | No |
| 1   | Yes                                                                                                                                                                                                                                                                                                                              |                                                                                                                                                                                                                                       |                                                                                                               |   |     |   |    |
| 0   | No                                                                                                                                                                                                                                                                                                                               |                                                                                                                                                                                                                                       |                                                                                                               |   |     |   |    |
| 598 | cns_dys_b4_ecmo<br>Show the field ONLY if: [ecmo(1)] = '1' or [ecmo(2)] = '1' or [ecmo(3)] = '1' or [ecmo(4)] = '1' or [ecmo(5)] = '1' or [ecmo(6)] = '1' or [ecmo(7)] = '1' or [ecmo_2(1)] = '1' or [ecmo_2(2)] = '1' or [ecmo_2(3)] = '1' or [ecmo_2(4)] = '1' or [ecmo_2(5)] = '1' or [ecmo_2(6)] = '1' or [ecmo_2(7)] = '1'  | History of CNS dysfunction within 30 days prior to ECMO cannulation? Defined as neurotrauma, stroke, encephalopathy/altered mental status, or seizure                                                                                 | yesno, Required<br><table border="1"> <tr><td>1</td><td>Yes</td></tr> <tr><td>0</td><td>No</td></tr> </table> | 1 | Yes | 0 | No |
| 1   | Yes                                                                                                                                                                                                                                                                                                                              |                                                                                                                                                                                                                                       |                                                                                                               |   |     |   |    |
| 0   | No                                                                                                                                                                                                                                                                                                                               |                                                                                                                                                                                                                                       |                                                                                                               |   |     |   |    |



|     |                                                                                                                                                                                                                                                                                                                                                                    |                                                                                                                                                                                                                                                           |                                                                                                                                                                                                                                                                                            |   |                |   |                  |   |      |   |      |   |      |
|-----|--------------------------------------------------------------------------------------------------------------------------------------------------------------------------------------------------------------------------------------------------------------------------------------------------------------------------------------------------------------------|-----------------------------------------------------------------------------------------------------------------------------------------------------------------------------------------------------------------------------------------------------------|--------------------------------------------------------------------------------------------------------------------------------------------------------------------------------------------------------------------------------------------------------------------------------------------|---|----------------|---|------------------|---|------|---|------|---|------|
| 599 | <p>peak_insp_press</p> <p>Show the field ONLY if:<br/>                 [ecmo(1)] = '1' or [ecmo(2)] = '1' or [ecmo(3)] = '1' or [ecmo(4)] = '1' or [ecmo(5)] = '1' or [ecmo(6)] = '1' or [ecmo(7)] = '1' or [ecmo_2(1)] = '1' or [ecmo_2(2)] = '1' or [ecmo_2(3)] = '1' or [ecmo_2(4)] = '1' or [ecmo_2(5)] = '1' or [ecmo_2(6)] = '1' or [ecmo_2(7)] = '1'</p>    | <p>Was peak inspiratory pressure on the ventilator <math>\geq</math>42 cm H<sub>2</sub>O at any time during the 48 hours prior to ECMO cannulation?</p>                                                                                                   | <p>yesno, Required</p> <table border="1" data-bbox="1040 113 1118 191"> <tr> <td>1</td> <td>Yes</td> </tr> <tr> <td>0</td> <td>No</td> </tr> </table>                                                                                                                                      | 1 | Yes            | 0 | No               |   |      |   |      |   |      |
| 1   | Yes                                                                                                                                                                                                                                                                                                                                                                |                                                                                                                                                                                                                                                           |                                                                                                                                                                                                                                                                                            |   |                |   |                  |   |      |   |      |   |      |
| 0   | No                                                                                                                                                                                                                                                                                                                                                                 |                                                                                                                                                                                                                                                           |                                                                                                                                                                                                                                                                                            |   |                |   |                  |   |      |   |      |   |      |
| 600 | <p>pre_ecmo_mode</p> <p>Show the field ONLY if:<br/>                 [ecmo(1)] = '1' or [ecmo(2)] = '1' or [ecmo(3)] = '1' or [ecmo(4)] = '1' or [ecmo(5)] = '1' or [ecmo(6)] = '1' or [ecmo(7)] = '1' or [ecmo_2(1)] = '1' or [ecmo_2(2)] = '1' or [ecmo_2(3)] = '1' or [ecmo_2(4)] = '1' or [ecmo_2(5)] = '1' or [ecmo_2(6)] = '1' or [ecmo_2(7)] = '1'</p>      | <p>Select the mode of mechanical ventilation documented closest to, but no more than 24 hours prior to ECMO cannulation</p>                                                                                                                               | <p>radio, Required</p> <table border="1" data-bbox="1040 432 1235 636"> <tr> <td>1</td> <td>Volume control</td> </tr> <tr> <td>2</td> <td>Pressure control</td> </tr> <tr> <td>3</td> <td>SIMV</td> </tr> <tr> <td>4</td> <td>APRV</td> </tr> <tr> <td>5</td> <td>HFOV</td> </tr> </table> | 1 | Volume control | 2 | Pressure control | 3 | SIMV | 4 | APRV | 5 | HFOV |
| 1   | Volume control                                                                                                                                                                                                                                                                                                                                                     |                                                                                                                                                                                                                                                           |                                                                                                                                                                                                                                                                                            |   |                |   |                  |   |      |   |      |   |      |
| 2   | Pressure control                                                                                                                                                                                                                                                                                                                                                   |                                                                                                                                                                                                                                                           |                                                                                                                                                                                                                                                                                            |   |                |   |                  |   |      |   |      |   |      |
| 3   | SIMV                                                                                                                                                                                                                                                                                                                                                               |                                                                                                                                                                                                                                                           |                                                                                                                                                                                                                                                                                            |   |                |   |                  |   |      |   |      |   |      |
| 4   | APRV                                                                                                                                                                                                                                                                                                                                                               |                                                                                                                                                                                                                                                           |                                                                                                                                                                                                                                                                                            |   |                |   |                  |   |      |   |      |   |      |
| 5   | HFOV                                                                                                                                                                                                                                                                                                                                                               |                                                                                                                                                                                                                                                           |                                                                                                                                                                                                                                                                                            |   |                |   |                  |   |      |   |      |   |      |
| 601 | <p>pre_ecmo_tv</p> <p>Show the field ONLY if:<br/>                 [ecmo(1)] = '1' or [ecmo(2)] = '1' or [ecmo(3)] = '1' or [ecmo(4)] = '1' or [ecmo(5)] = '1' or [ecmo(6)] = '1' or [ecmo(7)] = '1' or [ecmo_2(1)] = '1' or [ecmo_2(2)] = '1' or [ecmo_2(3)] = '1' or [ecmo_2(4)] = '1' or [ecmo_2(5)] = '1' or [ecmo_2(6)] = '1' or [ecmo_2(7)] = '1'</p>        | <p>Enter the tidal volume (mL) immediately prior to ECMO cannulation</p>                                                                                                                                                                                  | <p>text (integer, Min: 100, Max: 1000), Required</p>                                                                                                                                                                                                                                       |   |                |   |                  |   |      |   |      |   |      |
| 602 | <p>pre_ecmo_rr</p> <p>Show the field ONLY if:<br/>                 [ecmo(1)] = '1' or [ecmo(2)] = '1' or [ecmo(3)] = '1' or [ecmo(4)] = '1' or [ecmo(5)] = '1' or [ecmo(6)] = '1' or [ecmo(7)] = '1' or [ecmo_2(1)] = '1' or [ecmo_2(2)] = '1' or [ecmo_2(3)] = '1' or [ecmo_2(4)] = '1' or [ecmo_2(5)] = '1' or [ecmo_2(6)] = '1' or [ecmo_2(7)] = '1'</p>        | <p>Enter the respiratory rate (per minute) immediately prior to ECMO cannulation<br/>                 Enter the respiratory rate set on the mechanical ventilator, which not may not necessarily be the same as the patient's actual respiratory rate</p> | <p>text (integer, Min: 10, Max: 40), Required</p>                                                                                                                                                                                                                                          |   |                |   |                  |   |      |   |      |   |      |
| 603 | <p>pre_ecmo_plat_pres</p> <p>Show the field ONLY if:<br/>                 [ecmo(1)] = '1' or [ecmo(2)] = '1' or [ecmo(3)] = '1' or [ecmo(4)] = '1' or [ecmo(5)] = '1' or [ecmo(6)] = '1' or [ecmo(7)] = '1' or [ecmo_2(1)] = '1' or [ecmo_2(2)] = '1' or [ecmo_2(3)] = '1' or [ecmo_2(4)] = '1' or [ecmo_2(5)] = '1' or [ecmo_2(6)] = '1' or [ecmo_2(7)] = '1'</p> | <p>Enter the plateau pressure (cm H<sub>2</sub>O) immediately prior to ECMO cannulation<br/>                 If not available, enter "N/A"</p>                                                                                                            | <p>text, Required</p>                                                                                                                                                                                                                                                                      |   |                |   |                  |   |      |   |      |   |      |
| 604 | <p>pco2_pre_ecmo</p> <p>Show the field ONLY if:<br/>                 [ecmo(1)] = '1' or [ecmo(2)] = '1' or [ecmo(3)] = '1' or [ecmo(4)] = '1' or [ecmo(5)] = '1' or [ecmo(6)] = '1' or [ecmo(7)] = '1' or [ecmo_2(1)] = '1' or [ecmo_2(2)] = '1' or [ecmo_2(3)] = '1' or [ecmo_2(4)] = '1' or [ecmo_2(5)] = '1' or [ecmo_2(6)] = '1' or [ecmo_2(7)] = '1'</p>      | <p>What was the PCO<sub>2</sub> on the arterial blood gas immediately prior to ECMO cannulation?-Do not enter values from more than 24 hours prior to ECMO cannulation-If none available, enter "N/A"</p>                                                 | <p>text, Required</p>                                                                                                                                                                                                                                                                      |   |                |   |                  |   |      |   |      |   |      |

|            |                                                                                                                                                                                                                                                                                                                                                                     |                                                                                                                                                                                                                                                                                                                                                               |                                                                                                                                                                                                                                                                                            |   |                |   |                  |   |      |   |      |   |      |
|------------|---------------------------------------------------------------------------------------------------------------------------------------------------------------------------------------------------------------------------------------------------------------------------------------------------------------------------------------------------------------------|---------------------------------------------------------------------------------------------------------------------------------------------------------------------------------------------------------------------------------------------------------------------------------------------------------------------------------------------------------------|--------------------------------------------------------------------------------------------------------------------------------------------------------------------------------------------------------------------------------------------------------------------------------------------|---|----------------|---|------------------|---|------|---|------|---|------|
| <p>605</p> | <p>post_ecmo_mode</p> <p>Show the field ONLY if:<br/>                 [ecmo(1)] = '1' or [ecmo(2)] = '1' or [ecmo(3)] = '1' or [ecmo(4)] = '1' or [ecmo(5)] = '1' or [ecmo(6)] = '1' or [ecmo(7)] = '1' or [ecmo_2(1)] = '1' or [ecmo_2(2)] = '1' or [ecmo_2(3)] = '1' or [ecmo_2(4)] = '1' or [ecmo_2(5)] = '1' or [ecmo_2(6)] = '1' or [ecmo_2(7)] = '1'</p>      | <p>Select the earliest documented mode of mechanical ventilation on postoperative day 1 after ECMO cannulation-Postoperative day 1 is defined as the next day (starting at midnight) after ECMO cannulation</p>                                                                                                                                               | <p>radio, Required</p> <table border="1" data-bbox="1044 111 1235 310"> <tr> <td>1</td> <td>Volume control</td> </tr> <tr> <td>2</td> <td>Pressure control</td> </tr> <tr> <td>3</td> <td>SIMV</td> </tr> <tr> <td>4</td> <td>APRV</td> </tr> <tr> <td>5</td> <td>HFOV</td> </tr> </table> | 1 | Volume control | 2 | Pressure control | 3 | SIMV | 4 | APRV | 5 | HFOV |
| 1          | Volume control                                                                                                                                                                                                                                                                                                                                                      |                                                                                                                                                                                                                                                                                                                                                               |                                                                                                                                                                                                                                                                                            |   |                |   |                  |   |      |   |      |   |      |
| 2          | Pressure control                                                                                                                                                                                                                                                                                                                                                    |                                                                                                                                                                                                                                                                                                                                                               |                                                                                                                                                                                                                                                                                            |   |                |   |                  |   |      |   |      |   |      |
| 3          | SIMV                                                                                                                                                                                                                                                                                                                                                                |                                                                                                                                                                                                                                                                                                                                                               |                                                                                                                                                                                                                                                                                            |   |                |   |                  |   |      |   |      |   |      |
| 4          | APRV                                                                                                                                                                                                                                                                                                                                                                |                                                                                                                                                                                                                                                                                                                                                               |                                                                                                                                                                                                                                                                                            |   |                |   |                  |   |      |   |      |   |      |
| 5          | HFOV                                                                                                                                                                                                                                                                                                                                                                |                                                                                                                                                                                                                                                                                                                                                               |                                                                                                                                                                                                                                                                                            |   |                |   |                  |   |      |   |      |   |      |
| <p>606</p> | <p>post_ecmo_tv</p> <p>Show the field ONLY if:<br/>                 [ecmo(1)] = '1' or [ecmo(2)] = '1' or [ecmo(3)] = '1' or [ecmo(4)] = '1' or [ecmo(5)] = '1' or [ecmo(6)] = '1' or [ecmo(7)] = '1' or [ecmo_2(1)] = '1' or [ecmo_2(2)] = '1' or [ecmo_2(3)] = '1' or [ecmo_2(4)] = '1' or [ecmo_2(5)] = '1' or [ecmo_2(6)] = '1' or [ecmo_2(7)] = '1'</p>        | <p>Enter the earliest documented tidal volume (mL) on postoperative day 1 after ECMO cannulation-Postoperative day 1 is defined as the next day (starting at midnight) after ECMO cannulation</p>                                                                                                                                                             | <p>text (integer, Min: 100, Max: 1000), Required</p>                                                                                                                                                                                                                                       |   |                |   |                  |   |      |   |      |   |      |
| <p>607</p> | <p>post_ecmo_rr</p> <p>Show the field ONLY if:<br/>                 [ecmo(1)] = '1' or [ecmo(2)] = '1' or [ecmo(3)] = '1' or [ecmo(4)] = '1' or [ecmo(5)] = '1' or [ecmo(6)] = '1' or [ecmo(7)] = '1' or [ecmo_2(1)] = '1' or [ecmo_2(2)] = '1' or [ecmo_2(3)] = '1' or [ecmo_2(4)] = '1' or [ecmo_2(5)] = '1' or [ecmo_2(6)] = '1' or [ecmo_2(7)] = '1'</p>        | <p>Enter the earliest documented respiratory rate (per minute) on postoperative day 1 after ECMO cannulation-Postoperative day 1 is defined as the next day (starting at midnight) after ECMO cannulation-Enter the respiratory rate set on the mechanical ventilator, which not may not necessarily be the same as the patient's actual respiratory rate</p> | <p>text (integer, Min: 10, Max: 40), Required</p>                                                                                                                                                                                                                                          |   |                |   |                  |   |      |   |      |   |      |
| <p>608</p> | <p>post_ecmo_plat_pres</p> <p>Show the field ONLY if:<br/>                 [ecmo(1)] = '1' or [ecmo(2)] = '1' or [ecmo(3)] = '1' or [ecmo(4)] = '1' or [ecmo(5)] = '1' or [ecmo(6)] = '1' or [ecmo(7)] = '1' or [ecmo_2(1)] = '1' or [ecmo_2(2)] = '1' or [ecmo_2(3)] = '1' or [ecmo_2(4)] = '1' or [ecmo_2(5)] = '1' or [ecmo_2(6)] = '1' or [ecmo_2(7)] = '1'</p> | <p>Enter the earliest documented plateau pressure (cm H2O) on postoperative day 1 after ECMO cannulation-Postoperative day 1 is defined as the next day (starting at midnight) after ECMO cannulation-If not available, enter "N/A"</p>                                                                                                                       | <p>text, Required</p>                                                                                                                                                                                                                                                                      |   |                |   |                  |   |      |   |      |   |      |
| <p>609</p> | <p>pco2_post_ecmo</p> <p>Show the field ONLY if:<br/>                 [ecmo(1)] = '1' or [ecmo(2)] = '1' or [ecmo(3)] = '1' or [ecmo(4)] = '1' or [ecmo(5)] = '1' or [ecmo(6)] = '1' or [ecmo(7)] = '1' or [ecmo_2(1)] = '1' or [ecmo_2(2)] = '1' or [ecmo_2(3)] = '1' or [ecmo_2(4)] = '1' or [ecmo_2(5)] = '1' or [ecmo_2(6)] = '1' or [ecmo_2(7)] = '1'</p>      | <p>What was the PCO2 on the first arterial blood gas on postoperative day 1 after ECMO cannulation?-Postoperative day 1 is defined as the next day (starting at midnight) after ECMO cannulation-If none available, enter "N/A"</p>                                                                                                                           | <p>text, Required</p>                                                                                                                                                                                                                                                                      |   |                |   |                  |   |      |   |      |   |      |
| <p>610</p> | <p>ecmo_blood_flow</p> <p>Show the field ONLY if:<br/>                 [ecmo(1)] = '1' or [ecmo(2)] = '1' or [ecmo(3)] = '1' or [ecmo(4)] = '1' or [ecmo(5)] = '1' or [ecmo(6)] = '1' or [ecmo(7)] = '1' or [ecmo_2(1)] = '1' or [ecmo_2(2)] = '1' or [ecmo_2(3)] = '1' or [ecmo_2(4)] = '1' or [ecmo_2(5)] = '1' or [ecmo_2(6)] = '1' or [ecmo_2(7)] = '1'</p>     | <p>Enter the earliest documented ECMO circuit blood flow (in liters per minute, LPM) on postoperative day 1 after ECMO cannulation-Postoperative day 1 is defined as the next day (starting at midnight) after ECMO cannulation-If not available, enter "N/A"</p>                                                                                             | <p>text, Required</p>                                                                                                                                                                                                                                                                      |   |                |   |                  |   |      |   |      |   |      |

|     |                                                                                                                                                                                                                                                                                                                                        |                                                                                                                                                                                                                                                         |                                                                                                                                                                                                                                                                                                                                                                                                                                                                                                                                                                                                |   |                        |                              |    |                        |                         |   |                        |        |   |                        |                                           |   |                        |                            |   |                        |                   |
|-----|----------------------------------------------------------------------------------------------------------------------------------------------------------------------------------------------------------------------------------------------------------------------------------------------------------------------------------------|---------------------------------------------------------------------------------------------------------------------------------------------------------------------------------------------------------------------------------------------------------|------------------------------------------------------------------------------------------------------------------------------------------------------------------------------------------------------------------------------------------------------------------------------------------------------------------------------------------------------------------------------------------------------------------------------------------------------------------------------------------------------------------------------------------------------------------------------------------------|---|------------------------|------------------------------|----|------------------------|-------------------------|---|------------------------|--------|---|------------------------|-------------------------------------------|---|------------------------|----------------------------|---|------------------------|-------------------|
| 611 | ecmo_decann_28<br>Show the field ONLY if:<br>[ecmo(1)] = '1' or [ecmo(2)] = '1' or [ecmo(3)] = '1' or [ecmo(4)] = '1' or [ecmo(5)] = '1' or [ecmo(6)] = '1' or [ecmo(7)] = '1' or [ecmo_2(1)] = '1' or [ecmo_2(2)] = '1' or [ecmo_2(3)] = '1' or [ecmo_2(4)] = '1' or [ecmo_2(5)] = '1' or [ecmo_2(6)] = '1' or [ecmo_2(7)] = '1'      | Was the ECMO successfully decannulated (removed) during the first 28 days following ICU admission? If the ECMO was decannulated for palliative purposes, select "no"                                                                                    | yesno, Required<br><table border="1"> <tr> <td>1</td> <td>Yes</td> </tr> <tr> <td>0</td> <td>No</td> </tr> </table>                                                                                                                                                                                                                                                                                                                                                                                                                                                                            | 1 | Yes                    | 0                            | No |                        |                         |   |                        |        |   |                        |                                           |   |                        |                            |   |                        |                   |
| 1   | Yes                                                                                                                                                                                                                                                                                                                                    |                                                                                                                                                                                                                                                         |                                                                                                                                                                                                                                                                                                                                                                                                                                                                                                                                                                                                |   |                        |                              |    |                        |                         |   |                        |        |   |                        |                                           |   |                        |                            |   |                        |                   |
| 0   | No                                                                                                                                                                                                                                                                                                                                     |                                                                                                                                                                                                                                                         |                                                                                                                                                                                                                                                                                                                                                                                                                                                                                                                                                                                                |   |                        |                              |    |                        |                         |   |                        |        |   |                        |                                           |   |                        |                            |   |                        |                   |
| 612 | date_ecmo_decann28<br>Show the field ONLY if:<br>[ecmo_decann_28] = '1'                                                                                                                                                                                                                                                                | Date ECMO was decannulated                                                                                                                                                                                                                              | text (date_mdy), Required                                                                                                                                                                                                                                                                                                                                                                                                                                                                                                                                                                      |   |                        |                              |    |                        |                         |   |                        |        |   |                        |                                           |   |                        |                            |   |                        |                   |
| 613 | lib_vent_after_ecmo<br>Show the field ONLY if:<br>[ecmo(1)] = '1' or [ecmo(2)] = '1' or [ecmo(3)] = '1' or [ecmo(4)] = '1' or [ecmo(5)] = '1' or [ecmo(6)] = '1' or [ecmo(7)] = '1' or [ecmo_2(1)] = '1' or [ecmo_2(2)] = '1' or [ecmo_2(3)] = '1' or [ecmo_2(4)] = '1' or [ecmo_2(5)] = '1' or [ecmo_2(6)] = '1' or [ecmo_2(7)] = '1' | Successfully liberated from ventilator? Defined as off the ventilator for at least 24 hours. If palliatively extubated, select "no"                                                                                                                     | yesno, Required<br><table border="1"> <tr> <td>1</td> <td>Yes</td> </tr> <tr> <td>0</td> <td>No</td> </tr> </table>                                                                                                                                                                                                                                                                                                                                                                                                                                                                            | 1 | Yes                    | 0                            | No |                        |                         |   |                        |        |   |                        |                                           |   |                        |                            |   |                        |                   |
| 1   | Yes                                                                                                                                                                                                                                                                                                                                    |                                                                                                                                                                                                                                                         |                                                                                                                                                                                                                                                                                                                                                                                                                                                                                                                                                                                                |   |                        |                              |    |                        |                         |   |                        |        |   |                        |                                           |   |                        |                            |   |                        |                   |
| 0   | No                                                                                                                                                                                                                                                                                                                                     |                                                                                                                                                                                                                                                         |                                                                                                                                                                                                                                                                                                                                                                                                                                                                                                                                                                                                |   |                        |                              |    |                        |                         |   |                        |        |   |                        |                                           |   |                        |                            |   |                        |                   |
| 614 | lib_vent_after_ecmo_date<br>Show the field ONLY if:<br>[lib_vent_after_ecmo] = '1'                                                                                                                                                                                                                                                     | Date liberated from ventilator                                                                                                                                                                                                                          | text (date_mdy), Required                                                                                                                                                                                                                                                                                                                                                                                                                                                                                                                                                                      |   |                        |                              |    |                        |                         |   |                        |        |   |                        |                                           |   |                        |                            |   |                        |                   |
| 615 | pntx_after_ecmo<br>Show the field ONLY if:<br>[ecmo(1)] = '1' or [ecmo(2)] = '1' or [ecmo(3)] = '1' or [ecmo(4)] = '1' or [ecmo(5)] = '1' or [ecmo(6)] = '1' or [ecmo(7)] = '1' or [ecmo_2(1)] = '1' or [ecmo_2(2)] = '1' or [ecmo_2(3)] = '1' or [ecmo_2(4)] = '1' or [ecmo_2(5)] = '1' or [ecmo_2(6)] = '1' or [ecmo_2(7)] = '1'     | Did the patient develop a pneumothorax requiring chest tube placement at anytime following ECMO cannulation?                                                                                                                                            | yesno, Required<br><table border="1"> <tr> <td>1</td> <td>Yes</td> </tr> <tr> <td>0</td> <td>No</td> </tr> </table>                                                                                                                                                                                                                                                                                                                                                                                                                                                                            | 1 | Yes                    | 0                            | No |                        |                         |   |                        |        |   |                        |                                           |   |                        |                            |   |                        |                   |
| 1   | Yes                                                                                                                                                                                                                                                                                                                                    |                                                                                                                                                                                                                                                         |                                                                                                                                                                                                                                                                                                                                                                                                                                                                                                                                                                                                |   |                        |                              |    |                        |                         |   |                        |        |   |                        |                                           |   |                        |                            |   |                        |                   |
| 0   | No                                                                                                                                                                                                                                                                                                                                     |                                                                                                                                                                                                                                                         |                                                                                                                                                                                                                                                                                                                                                                                                                                                                                                                                                                                                |   |                        |                              |    |                        |                         |   |                        |        |   |                        |                                           |   |                        |                            |   |                        |                   |
| 616 | date_pntx<br>Show the field ONLY if:<br>[pntx_after_ecmo] = '1'                                                                                                                                                                                                                                                                        | Date of pneumothorax requiring chest tube placement                                                                                                                                                                                                     | text (date_mdy), Required                                                                                                                                                                                                                                                                                                                                                                                                                                                                                                                                                                      |   |                        |                              |    |                        |                         |   |                        |        |   |                        |                                           |   |                        |                            |   |                        |                   |
| 617 | thrombosis_15_to_28<br>Show the field ONLY if:<br>[ecmo(1)] = '1' or [ecmo(2)] = '1' or [ecmo(3)] = '1' or [ecmo(4)] = '1' or [ecmo(5)] = '1' or [ecmo(6)] = '1' or [ecmo(7)] = '1' or [ecmo_2(1)] = '1' or [ecmo_2(2)] = '1' or [ecmo_2(3)] = '1' or [ecmo_2(4)] = '1' or [ecmo_2(5)] = '1' or [ecmo_2(6)] = '1' or [ecmo_2(7)] = '1' | New thromboembolic event in the 15-28 days following ICU admission (select all that apply)-Note, this question is limited to days 15-28 following ICU admission because the same question has already been asked on an earlier instrument for days 1-14 | checkbox, Required<br><table border="1"> <tr> <td>1</td> <td>thrombosis_15_to_28__1</td> <td>Deep venous thrombosis (DVT)</td> </tr> <tr> <td>2</td> <td>thrombosis_15_to_28__2</td> <td>Pulmonary embolism (PE)</td> </tr> <tr> <td>3</td> <td>thrombosis_15_to_28__3</td> <td>Stroke</td> </tr> <tr> <td>4</td> <td>thrombosis_15_to_28__4</td> <td>Heparin-induced thrombocytopenia (H.I.T.)</td> </tr> <tr> <td>5</td> <td>thrombosis_15_to_28__5</td> <td>Other thromboembolic event</td> </tr> <tr> <td>6</td> <td>thrombosis_15_to_28__6</td> <td>None of the above</td> </tr> </table> | 1 | thrombosis_15_to_28__1 | Deep venous thrombosis (DVT) | 2  | thrombosis_15_to_28__2 | Pulmonary embolism (PE) | 3 | thrombosis_15_to_28__3 | Stroke | 4 | thrombosis_15_to_28__4 | Heparin-induced thrombocytopenia (H.I.T.) | 5 | thrombosis_15_to_28__5 | Other thromboembolic event | 6 | thrombosis_15_to_28__6 | None of the above |
| 1   | thrombosis_15_to_28__1                                                                                                                                                                                                                                                                                                                 | Deep venous thrombosis (DVT)                                                                                                                                                                                                                            |                                                                                                                                                                                                                                                                                                                                                                                                                                                                                                                                                                                                |   |                        |                              |    |                        |                         |   |                        |        |   |                        |                                           |   |                        |                            |   |                        |                   |
| 2   | thrombosis_15_to_28__2                                                                                                                                                                                                                                                                                                                 | Pulmonary embolism (PE)                                                                                                                                                                                                                                 |                                                                                                                                                                                                                                                                                                                                                                                                                                                                                                                                                                                                |   |                        |                              |    |                        |                         |   |                        |        |   |                        |                                           |   |                        |                            |   |                        |                   |
| 3   | thrombosis_15_to_28__3                                                                                                                                                                                                                                                                                                                 | Stroke                                                                                                                                                                                                                                                  |                                                                                                                                                                                                                                                                                                                                                                                                                                                                                                                                                                                                |   |                        |                              |    |                        |                         |   |                        |        |   |                        |                                           |   |                        |                            |   |                        |                   |
| 4   | thrombosis_15_to_28__4                                                                                                                                                                                                                                                                                                                 | Heparin-induced thrombocytopenia (H.I.T.)                                                                                                                                                                                                               |                                                                                                                                                                                                                                                                                                                                                                                                                                                                                                                                                                                                |   |                        |                              |    |                        |                         |   |                        |        |   |                        |                                           |   |                        |                            |   |                        |                   |
| 5   | thrombosis_15_to_28__5                                                                                                                                                                                                                                                                                                                 | Other thromboembolic event                                                                                                                                                                                                                              |                                                                                                                                                                                                                                                                                                                                                                                                                                                                                                                                                                                                |   |                        |                              |    |                        |                         |   |                        |        |   |                        |                                           |   |                        |                            |   |                        |                   |
| 6   | thrombosis_15_to_28__6                                                                                                                                                                                                                                                                                                                 | None of the above                                                                                                                                                                                                                                       |                                                                                                                                                                                                                                                                                                                                                                                                                                                                                                                                                                                                |   |                        |                              |    |                        |                         |   |                        |        |   |                        |                                           |   |                        |                            |   |                        |                   |
| 618 | date_dvt_after_ecmo<br>Show the field ONLY if:<br>[thrombosis_15_to_28(1)] = '1'                                                                                                                                                                                                                                                       | Date of DVT                                                                                                                                                                                                                                             | text (date_mdy), Required                                                                                                                                                                                                                                                                                                                                                                                                                                                                                                                                                                      |   |                        |                              |    |                        |                         |   |                        |        |   |                        |                                           |   |                        |                            |   |                        |                   |

|     |                                                                                                                                                                                                                                                                                                                                           |                                                                                                                                                                                                                                                                                                                                                                                                                                                                                                                                                                                                                                                                                                                                                                                          |                                                                                                                                                                                                                                                                                                                                                                                                                                                                                                                                                                                                                                                                                                                                                                                                                                                                       |   |                        |                  |    |                        |         |   |                        |             |   |                        |            |   |                        |                 |   |                        |                        |   |                        |                  |   |                        |               |   |                        |                                 |    |                         |       |
|-----|-------------------------------------------------------------------------------------------------------------------------------------------------------------------------------------------------------------------------------------------------------------------------------------------------------------------------------------------|------------------------------------------------------------------------------------------------------------------------------------------------------------------------------------------------------------------------------------------------------------------------------------------------------------------------------------------------------------------------------------------------------------------------------------------------------------------------------------------------------------------------------------------------------------------------------------------------------------------------------------------------------------------------------------------------------------------------------------------------------------------------------------------|-----------------------------------------------------------------------------------------------------------------------------------------------------------------------------------------------------------------------------------------------------------------------------------------------------------------------------------------------------------------------------------------------------------------------------------------------------------------------------------------------------------------------------------------------------------------------------------------------------------------------------------------------------------------------------------------------------------------------------------------------------------------------------------------------------------------------------------------------------------------------|---|------------------------|------------------|----|------------------------|---------|---|------------------------|-------------|---|------------------------|------------|---|------------------------|-----------------|---|------------------------|------------------------|---|------------------------|------------------|---|------------------------|---------------|---|------------------------|---------------------------------|----|-------------------------|-------|
| 619 | date_pe_after_ecmo<br>Show the field ONLY if:<br>[thrombosis_15_to_28(2)] = '1'                                                                                                                                                                                                                                                           | Date of pulmonary embolism                                                                                                                                                                                                                                                                                                                                                                                                                                                                                                                                                                                                                                                                                                                                                               | text (date_mdy), Required                                                                                                                                                                                                                                                                                                                                                                                                                                                                                                                                                                                                                                                                                                                                                                                                                                             |   |                        |                  |    |                        |         |   |                        |             |   |                        |            |   |                        |                 |   |                        |                        |   |                        |                  |   |                        |               |   |                        |                                 |    |                         |       |
| 620 | date_stroke_after_ecmo<br>Show the field ONLY if:<br>[thrombosis_15_to_28(3)] = '1'                                                                                                                                                                                                                                                       | Date of stroke                                                                                                                                                                                                                                                                                                                                                                                                                                                                                                                                                                                                                                                                                                                                                                           | text (date_mdy), Required                                                                                                                                                                                                                                                                                                                                                                                                                                                                                                                                                                                                                                                                                                                                                                                                                                             |   |                        |                  |    |                        |         |   |                        |             |   |                        |            |   |                        |                 |   |                        |                        |   |                        |                  |   |                        |               |   |                        |                                 |    |                         |       |
| 621 | date_hit_after_ecmo<br>Show the field ONLY if:<br>[thrombosis_15_to_28(4)] = '1'                                                                                                                                                                                                                                                          | Date of Heparin-induced thrombocytopenia (H.I.T.)                                                                                                                                                                                                                                                                                                                                                                                                                                                                                                                                                                                                                                                                                                                                        | text (date_mdy), Required                                                                                                                                                                                                                                                                                                                                                                                                                                                                                                                                                                                                                                                                                                                                                                                                                                             |   |                        |                  |    |                        |         |   |                        |             |   |                        |            |   |                        |                 |   |                        |                        |   |                        |                  |   |                        |               |   |                        |                                 |    |                         |       |
| 622 | date_other_thromb<br>Show the field ONLY if:<br>[thrombosis_15_to_28(5)] = '1'                                                                                                                                                                                                                                                            | Date of other thromboembolic event                                                                                                                                                                                                                                                                                                                                                                                                                                                                                                                                                                                                                                                                                                                                                       | text (date_mdy), Required                                                                                                                                                                                                                                                                                                                                                                                                                                                                                                                                                                                                                                                                                                                                                                                                                                             |   |                        |                  |    |                        |         |   |                        |             |   |                        |            |   |                        |                 |   |                        |                        |   |                        |                  |   |                        |               |   |                        |                                 |    |                         |       |
| 623 | other_te_event_ecmo<br>Show the field ONLY if:<br>[thrombosis_15_to_28(5)] = '1'                                                                                                                                                                                                                                                          | Enter the other thromboembolic event                                                                                                                                                                                                                                                                                                                                                                                                                                                                                                                                                                                                                                                                                                                                                     | text, Required                                                                                                                                                                                                                                                                                                                                                                                                                                                                                                                                                                                                                                                                                                                                                                                                                                                        |   |                        |                  |    |                        |         |   |                        |             |   |                        |            |   |                        |                 |   |                        |                        |   |                        |                  |   |                        |               |   |                        |                                 |    |                         |       |
| 624 | major_bleed_after_ecmo<br>Show the field ONLY if:<br>[ecmo(1)] = '1' or [ecmo(2)] = '1' or [ecmo(3)] = '1' or [ecmo(4)] = '1' or [ecmo(5)] = '1' or [ecmo(6)] = '1' or [ecmo(7)] = '1' or [ecmo_2(1)] = '1' or [ecmo_2(2)] = '1' or [ecmo_2(3)] = '1' or [ecmo_2(4)] = '1' or [ecmo_2(5)] = '1' or [ecmo_2(6)] = '1' or [ecmo_2(7)] = '1' | New major bleed in the first 15-28 days following ICU admission?-Note, this question is limited to days 15-28 following ICU admission because the same question has already been asked on an earlier instrument for days 1-14. Defined as bleeding in a critical area or organ (e.g., intracranial, retroperitoneal, pericardial, or intramuscular bleeding with compartment syndrome) or bleeding requiring a procedural intervention (e.g., EGD or IR embolization). "Requiring" a procedural intervention could include situations where an intervention would regularly be performed, but was not actually performed because the patient was too unstable, or because of logistical/other concerns related to COVID-19. Blood transfusion alone does not qualify as an intervention. | yesno, Required<br><table border="1"> <tr> <td>1</td> <td>Yes</td> </tr> <tr> <td>0</td> <td>No</td> </tr> </table>                                                                                                                                                                                                                                                                                                                                                                                                                                                                                                                                                                                                                                                                                                                                                   | 1 | Yes                    | 0                | No |                        |         |   |                        |             |   |                        |            |   |                        |                 |   |                        |                        |   |                        |                  |   |                        |               |   |                        |                                 |    |                         |       |
| 1   | Yes                                                                                                                                                                                                                                                                                                                                       |                                                                                                                                                                                                                                                                                                                                                                                                                                                                                                                                                                                                                                                                                                                                                                                          |                                                                                                                                                                                                                                                                                                                                                                                                                                                                                                                                                                                                                                                                                                                                                                                                                                                                       |   |                        |                  |    |                        |         |   |                        |             |   |                        |            |   |                        |                 |   |                        |                        |   |                        |                  |   |                        |               |   |                        |                                 |    |                         |       |
| 0   | No                                                                                                                                                                                                                                                                                                                                        |                                                                                                                                                                                                                                                                                                                                                                                                                                                                                                                                                                                                                                                                                                                                                                                          |                                                                                                                                                                                                                                                                                                                                                                                                                                                                                                                                                                                                                                                                                                                                                                                                                                                                       |   |                        |                  |    |                        |         |   |                        |             |   |                        |            |   |                        |                 |   |                        |                        |   |                        |                  |   |                        |               |   |                        |                                 |    |                         |       |
| 625 | date_bleed_after_ecmo<br>Show the field ONLY if:<br>[major_bleed_after_ecmo] = '1'                                                                                                                                                                                                                                                        | Date major bleed occurred                                                                                                                                                                                                                                                                                                                                                                                                                                                                                                                                                                                                                                                                                                                                                                | text (date_mdy), Required                                                                                                                                                                                                                                                                                                                                                                                                                                                                                                                                                                                                                                                                                                                                                                                                                                             |   |                        |                  |    |                        |         |   |                        |             |   |                        |            |   |                        |                 |   |                        |                        |   |                        |                  |   |                        |               |   |                        |                                 |    |                         |       |
| 626 | bleed_location_ecmo<br>Show the field ONLY if:<br>[major_bleed_after_ecmo] = '1'                                                                                                                                                                                                                                                          | Location of major bleeding event(s) (select all that apply)                                                                                                                                                                                                                                                                                                                                                                                                                                                                                                                                                                                                                                                                                                                              | checkbox, Required<br><table border="1"> <tr> <td>1</td> <td>bleed_location_ecmo__1</td> <td>Bronchopulmonary</td> </tr> <tr> <td>2</td> <td>bleed_location_ecmo__2</td> <td>Pleural</td> </tr> <tr> <td>3</td> <td>bleed_location_ecmo__3</td> <td>Pericardial</td> </tr> <tr> <td>4</td> <td>bleed_location_ecmo__4</td> <td>Peritoneal</td> </tr> <tr> <td>5</td> <td>bleed_location_ecmo__5</td> <td>Retroperitoneal</td> </tr> <tr> <td>6</td> <td>bleed_location_ecmo__6</td> <td>Central nervous system</td> </tr> <tr> <td>7</td> <td>bleed_location_ecmo__7</td> <td>Gastrointestinal</td> </tr> <tr> <td>8</td> <td>bleed_location_ecmo__8</td> <td>Genitourinary</td> </tr> <tr> <td>9</td> <td>bleed_location_ecmo__9</td> <td>Musculoskeletal and soft tissue</td> </tr> <tr> <td>10</td> <td>bleed_location_ecmo__10</td> <td>Other</td> </tr> </table> | 1 | bleed_location_ecmo__1 | Bronchopulmonary | 2  | bleed_location_ecmo__2 | Pleural | 3 | bleed_location_ecmo__3 | Pericardial | 4 | bleed_location_ecmo__4 | Peritoneal | 5 | bleed_location_ecmo__5 | Retroperitoneal | 6 | bleed_location_ecmo__6 | Central nervous system | 7 | bleed_location_ecmo__7 | Gastrointestinal | 8 | bleed_location_ecmo__8 | Genitourinary | 9 | bleed_location_ecmo__9 | Musculoskeletal and soft tissue | 10 | bleed_location_ecmo__10 | Other |
| 1   | bleed_location_ecmo__1                                                                                                                                                                                                                                                                                                                    | Bronchopulmonary                                                                                                                                                                                                                                                                                                                                                                                                                                                                                                                                                                                                                                                                                                                                                                         |                                                                                                                                                                                                                                                                                                                                                                                                                                                                                                                                                                                                                                                                                                                                                                                                                                                                       |   |                        |                  |    |                        |         |   |                        |             |   |                        |            |   |                        |                 |   |                        |                        |   |                        |                  |   |                        |               |   |                        |                                 |    |                         |       |
| 2   | bleed_location_ecmo__2                                                                                                                                                                                                                                                                                                                    | Pleural                                                                                                                                                                                                                                                                                                                                                                                                                                                                                                                                                                                                                                                                                                                                                                                  |                                                                                                                                                                                                                                                                                                                                                                                                                                                                                                                                                                                                                                                                                                                                                                                                                                                                       |   |                        |                  |    |                        |         |   |                        |             |   |                        |            |   |                        |                 |   |                        |                        |   |                        |                  |   |                        |               |   |                        |                                 |    |                         |       |
| 3   | bleed_location_ecmo__3                                                                                                                                                                                                                                                                                                                    | Pericardial                                                                                                                                                                                                                                                                                                                                                                                                                                                                                                                                                                                                                                                                                                                                                                              |                                                                                                                                                                                                                                                                                                                                                                                                                                                                                                                                                                                                                                                                                                                                                                                                                                                                       |   |                        |                  |    |                        |         |   |                        |             |   |                        |            |   |                        |                 |   |                        |                        |   |                        |                  |   |                        |               |   |                        |                                 |    |                         |       |
| 4   | bleed_location_ecmo__4                                                                                                                                                                                                                                                                                                                    | Peritoneal                                                                                                                                                                                                                                                                                                                                                                                                                                                                                                                                                                                                                                                                                                                                                                               |                                                                                                                                                                                                                                                                                                                                                                                                                                                                                                                                                                                                                                                                                                                                                                                                                                                                       |   |                        |                  |    |                        |         |   |                        |             |   |                        |            |   |                        |                 |   |                        |                        |   |                        |                  |   |                        |               |   |                        |                                 |    |                         |       |
| 5   | bleed_location_ecmo__5                                                                                                                                                                                                                                                                                                                    | Retroperitoneal                                                                                                                                                                                                                                                                                                                                                                                                                                                                                                                                                                                                                                                                                                                                                                          |                                                                                                                                                                                                                                                                                                                                                                                                                                                                                                                                                                                                                                                                                                                                                                                                                                                                       |   |                        |                  |    |                        |         |   |                        |             |   |                        |            |   |                        |                 |   |                        |                        |   |                        |                  |   |                        |               |   |                        |                                 |    |                         |       |
| 6   | bleed_location_ecmo__6                                                                                                                                                                                                                                                                                                                    | Central nervous system                                                                                                                                                                                                                                                                                                                                                                                                                                                                                                                                                                                                                                                                                                                                                                   |                                                                                                                                                                                                                                                                                                                                                                                                                                                                                                                                                                                                                                                                                                                                                                                                                                                                       |   |                        |                  |    |                        |         |   |                        |             |   |                        |            |   |                        |                 |   |                        |                        |   |                        |                  |   |                        |               |   |                        |                                 |    |                         |       |
| 7   | bleed_location_ecmo__7                                                                                                                                                                                                                                                                                                                    | Gastrointestinal                                                                                                                                                                                                                                                                                                                                                                                                                                                                                                                                                                                                                                                                                                                                                                         |                                                                                                                                                                                                                                                                                                                                                                                                                                                                                                                                                                                                                                                                                                                                                                                                                                                                       |   |                        |                  |    |                        |         |   |                        |             |   |                        |            |   |                        |                 |   |                        |                        |   |                        |                  |   |                        |               |   |                        |                                 |    |                         |       |
| 8   | bleed_location_ecmo__8                                                                                                                                                                                                                                                                                                                    | Genitourinary                                                                                                                                                                                                                                                                                                                                                                                                                                                                                                                                                                                                                                                                                                                                                                            |                                                                                                                                                                                                                                                                                                                                                                                                                                                                                                                                                                                                                                                                                                                                                                                                                                                                       |   |                        |                  |    |                        |         |   |                        |             |   |                        |            |   |                        |                 |   |                        |                        |   |                        |                  |   |                        |               |   |                        |                                 |    |                         |       |
| 9   | bleed_location_ecmo__9                                                                                                                                                                                                                                                                                                                    | Musculoskeletal and soft tissue                                                                                                                                                                                                                                                                                                                                                                                                                                                                                                                                                                                                                                                                                                                                                          |                                                                                                                                                                                                                                                                                                                                                                                                                                                                                                                                                                                                                                                                                                                                                                                                                                                                       |   |                        |                  |    |                        |         |   |                        |             |   |                        |            |   |                        |                 |   |                        |                        |   |                        |                  |   |                        |               |   |                        |                                 |    |                         |       |
| 10  | bleed_location_ecmo__10                                                                                                                                                                                                                                                                                                                   | Other                                                                                                                                                                                                                                                                                                                                                                                                                                                                                                                                                                                                                                                                                                                                                                                    |                                                                                                                                                                                                                                                                                                                                                                                                                                                                                                                                                                                                                                                                                                                                                                                                                                                                       |   |                        |                  |    |                        |         |   |                        |             |   |                        |            |   |                        |                 |   |                        |                        |   |                        |                  |   |                        |               |   |                        |                                 |    |                         |       |
| 627 | other_bleed_ecmo<br>Show the field ONLY if:<br>[bleed_location_ecmo(10)] = '1'                                                                                                                                                                                                                                                            | Enter the location of the other bleed                                                                                                                                                                                                                                                                                                                                                                                                                                                                                                                                                                                                                                                                                                                                                    | text, Required                                                                                                                                                                                                                                                                                                                                                                                                                                                                                                                                                                                                                                                                                                                                                                                                                                                        |   |                        |                  |    |                        |         |   |                        |             |   |                        |            |   |                        |                 |   |                        |                        |   |                        |                  |   |                        |               |   |                        |                                 |    |                         |       |

|     |                                                                                                                                                                                                                                                                                                                                                        |                                                                                                                                                                                                                                                                                                                                                                                                                                                                                                                                                    |                                                                                                                                                                                                                                                                                                                                                                                                                                                                                  |   |                        |                                                       |            |                        |           |   |                        |                |   |                        |            |   |                        |       |
|-----|--------------------------------------------------------------------------------------------------------------------------------------------------------------------------------------------------------------------------------------------------------------------------------------------------------------------------------------------------------|----------------------------------------------------------------------------------------------------------------------------------------------------------------------------------------------------------------------------------------------------------------------------------------------------------------------------------------------------------------------------------------------------------------------------------------------------------------------------------------------------------------------------------------------------|----------------------------------------------------------------------------------------------------------------------------------------------------------------------------------------------------------------------------------------------------------------------------------------------------------------------------------------------------------------------------------------------------------------------------------------------------------------------------------|---|------------------------|-------------------------------------------------------|------------|------------------------|-----------|---|------------------------|----------------|---|------------------------|------------|---|------------------------|-------|
| 628 | <p>newinfection_after_ecmo</p> <p>Show the field ONLY if:<br/>[ecmo(1)] = '1' or [ecmo(2)] = '1' or [ecmo(3)] = '1' or [ecmo(4)] = '1' or [ecmo(5)] = '1' or [ecmo(6)] = '1' or [ecmo(7)] = '1' or [ecmo_2(1)] = '1' or [ecmo_2(2)] = '1' or [ecmo_2(3)] = '1' or [ecmo_2(4)] = '1' or [ecmo_2(5)] = '1' or [ecmo_2(6)] = '1' or [ecmo_2(7)] = '1'</p> | <p>New infection on days 15 to 28 following ICU admission?-Note, this question is limited to days 15-28 following ICU admission because the same question has already been asked on an earlier instrument for days 1-14. Defined as a suspected or confirmed new infection other than COVID-19. Should be primarily based on culture data (e.g., sputum, blood, urine, and stool), though other infections can also be included (e.g., cellulitis, abscess) if there was a strong clinical suspicion, even in the absence of positive cultures</p> | <p>yesno, Required</p> <table border="1"> <tr> <td>1</td> <td>Yes</td> </tr> <tr> <td>0</td> <td>No</td> </tr> </table>                                                                                                                                                                                                                                                                                                                                                          | 1 | Yes                    | 0                                                     | No         |                        |           |   |                        |                |   |                        |            |   |                        |       |
| 1   | Yes                                                                                                                                                                                                                                                                                                                                                    |                                                                                                                                                                                                                                                                                                                                                                                                                                                                                                                                                    |                                                                                                                                                                                                                                                                                                                                                                                                                                                                                  |   |                        |                                                       |            |                        |           |   |                        |                |   |                        |            |   |                        |       |
| 0   | No                                                                                                                                                                                                                                                                                                                                                     |                                                                                                                                                                                                                                                                                                                                                                                                                                                                                                                                                    |                                                                                                                                                                                                                                                                                                                                                                                                                                                                                  |   |                        |                                                       |            |                        |           |   |                        |                |   |                        |            |   |                        |       |
| 629 | <p>date_newinf_after_ecmo</p> <p>Show the field ONLY if:<br/>[newinfection_after_ecmo] = '1'</p>                                                                                                                                                                                                                                                       | <p>Date new infection occurred</p>                                                                                                                                                                                                                                                                                                                                                                                                                                                                                                                 | <p>text (date_mdy), Required</p>                                                                                                                                                                                                                                                                                                                                                                                                                                                 |   |                        |                                                       |            |                        |           |   |                        |                |   |                        |            |   |                        |       |
| 630 | <p>type_inf_after_ecmo</p> <p>Show the field ONLY if:<br/>[newinfection_after_ecmo] = '1'</p>                                                                                                                                                                                                                                                          | <p>What infection(s)?</p>                                                                                                                                                                                                                                                                                                                                                                                                                                                                                                                          | <p>checkbox, Required</p> <table border="1"> <tr> <td>1</td> <td>type_inf_after_ecmo__1</td> <td>Pneumonia (including ventilator-associated pneumonia)</td> </tr> <tr> <td>2</td> <td>type_inf_after_ecmo__2</td> <td>Urosepsis</td> </tr> <tr> <td>3</td> <td>type_inf_after_ecmo__3</td> <td>Biliary sepsis</td> </tr> <tr> <td>4</td> <td>type_inf_after_ecmo__4</td> <td>Bacteremia</td> </tr> <tr> <td>5</td> <td>type_inf_after_ecmo__5</td> <td>Other</td> </tr> </table> | 1 | type_inf_after_ecmo__1 | Pneumonia (including ventilator-associated pneumonia) | 2          | type_inf_after_ecmo__2 | Urosepsis | 3 | type_inf_after_ecmo__3 | Biliary sepsis | 4 | type_inf_after_ecmo__4 | Bacteremia | 5 | type_inf_after_ecmo__5 | Other |
| 1   | type_inf_after_ecmo__1                                                                                                                                                                                                                                                                                                                                 | Pneumonia (including ventilator-associated pneumonia)                                                                                                                                                                                                                                                                                                                                                                                                                                                                                              |                                                                                                                                                                                                                                                                                                                                                                                                                                                                                  |   |                        |                                                       |            |                        |           |   |                        |                |   |                        |            |   |                        |       |
| 2   | type_inf_after_ecmo__2                                                                                                                                                                                                                                                                                                                                 | Urosepsis                                                                                                                                                                                                                                                                                                                                                                                                                                                                                                                                          |                                                                                                                                                                                                                                                                                                                                                                                                                                                                                  |   |                        |                                                       |            |                        |           |   |                        |                |   |                        |            |   |                        |       |
| 3   | type_inf_after_ecmo__3                                                                                                                                                                                                                                                                                                                                 | Biliary sepsis                                                                                                                                                                                                                                                                                                                                                                                                                                                                                                                                     |                                                                                                                                                                                                                                                                                                                                                                                                                                                                                  |   |                        |                                                       |            |                        |           |   |                        |                |   |                        |            |   |                        |       |
| 4   | type_inf_after_ecmo__4                                                                                                                                                                                                                                                                                                                                 | Bacteremia                                                                                                                                                                                                                                                                                                                                                                                                                                                                                                                                         |                                                                                                                                                                                                                                                                                                                                                                                                                                                                                  |   |                        |                                                       |            |                        |           |   |                        |                |   |                        |            |   |                        |       |
| 5   | type_inf_after_ecmo__5                                                                                                                                                                                                                                                                                                                                 | Other                                                                                                                                                                                                                                                                                                                                                                                                                                                                                                                                              |                                                                                                                                                                                                                                                                                                                                                                                                                                                                                  |   |                        |                                                       |            |                        |           |   |                        |                |   |                        |            |   |                        |       |
| 631 | <p>rrt_after_ecmo</p> <p>Show the field ONLY if:<br/>[ecmo(1)] = '1' or [ecmo(2)] = '1' or [ecmo(3)] = '1' or [ecmo(4)] = '1' or [ecmo(5)] = '1' or [ecmo(6)] = '1' or [ecmo(7)] = '1' or [ecmo_2(1)] = '1' or [ecmo_2(2)] = '1' or [ecmo_2(3)] = '1' or [ecmo_2(4)] = '1' or [ecmo_2(5)] = '1' or [ecmo_2(6)] = '1' or [ecmo_2(7)] = '1'</p>          | <p>Requirement for new renal replacement therapy (dialysis) at any time on days 15-28 following ICU admission?-Note, this question is limited to days 15-28 following ICU admission because the same question has already been asked on an earlier instrument for days 1-14.-Only answer "yes" if the patient required new renal replacement therapy on any of days 15-28 and did NOT require it on days 1-14.</p>                                                                                                                                 | <p>yesno, Required</p> <table border="1"> <tr> <td>1</td> <td>Yes</td> </tr> <tr> <td>0</td> <td>No</td> </tr> </table>                                                                                                                                                                                                                                                                                                                                                          | 1 | Yes                    | 0                                                     | No         |                        |           |   |                        |                |   |                        |            |   |                        |       |
| 1   | Yes                                                                                                                                                                                                                                                                                                                                                    |                                                                                                                                                                                                                                                                                                                                                                                                                                                                                                                                                    |                                                                                                                                                                                                                                                                                                                                                                                                                                                                                  |   |                        |                                                       |            |                        |           |   |                        |                |   |                        |            |   |                        |       |
| 0   | No                                                                                                                                                                                                                                                                                                                                                     |                                                                                                                                                                                                                                                                                                                                                                                                                                                                                                                                                    |                                                                                                                                                                                                                                                                                                                                                                                                                                                                                  |   |                        |                                                       |            |                        |           |   |                        |                |   |                        |            |   |                        |       |
| 632 | <p>date_rrt_after_ecmo</p> <p>Show the field ONLY if:<br/>[rrt_after_ecmo] = '1'</p>                                                                                                                                                                                                                                                                   | <p>Date renal replacement therapy initiated</p>                                                                                                                                                                                                                                                                                                                                                                                                                                                                                                    | <p>text (date_mdy), Required</p>                                                                                                                                                                                                                                                                                                                                                                                                                                                 |   |                        |                                                       |            |                        |           |   |                        |                |   |                        |            |   |                        |       |
| 633 | <p>additional_ecmo_data_complete</p>                                                                                                                                                                                                                                                                                                                   | <p>Section Header: <i>Form Status</i><br/>Complete?</p>                                                                                                                                                                                                                                                                                                                                                                                                                                                                                            | <p>dropdown</p> <table border="1"> <tr> <td>0</td> <td>Incomplete</td> </tr> <tr> <td>1</td> <td>Unverified</td> </tr> <tr> <td>2</td> <td>Complete</td> </tr> </table>                                                                                                                                                                                                                                                                                                          | 0 | Incomplete             | 1                                                     | Unverified | 2                      | Complete  |   |                        |                |   |                        |            |   |                        |       |
| 0   | Incomplete                                                                                                                                                                                                                                                                                                                                             |                                                                                                                                                                                                                                                                                                                                                                                                                                                                                                                                                    |                                                                                                                                                                                                                                                                                                                                                                                                                                                                                  |   |                        |                                                       |            |                        |           |   |                        |                |   |                        |            |   |                        |       |
| 1   | Unverified                                                                                                                                                                                                                                                                                                                                             |                                                                                                                                                                                                                                                                                                                                                                                                                                                                                                                                                    |                                                                                                                                                                                                                                                                                                                                                                                                                                                                                  |   |                        |                                                       |            |                        |           |   |                        |                |   |                        |            |   |                        |       |
| 2   | Complete                                                                                                                                                                                                                                                                                                                                               |                                                                                                                                                                                                                                                                                                                                                                                                                                                                                                                                                    |                                                                                                                                                                                                                                                                                                                                                                                                                                                                                  |   |                        |                                                       |            |                        |           |   |                        |                |   |                        |            |   |                        |       |
